# Supplementary material for: Pearl Sac Gene Expression Profiles Associated With Pearl Attributes in the Silver-Lip Pearl Oyster, Pinctada maxima
Source: Front Genet. 2021 Jan 8;11:597459. doi: 10.3389/fgene.2020.597459 (PMC7820862; doi:10.3389/fgene.2020.597459)
Supplement: Supplementary Table 1 — Transcripts differentially expressed between sacs producing high vs low lustre pearls. [file Data_Sheet_4.xlsx]

## Sheet: Table S1 - Lustre
Table S1. Transcripts differentially expressed between sacs producing high vs low lustre pearls.
Transcript ID	Mean of normalised counts - all samples	High lustre vs low lustre					Trinotate transcript annotation
		log2 Fold change	log2 fold change standard error	Wald statistic	Wald test p-value	Adjusted P-value	Swissprot top BLASTX hit	Pfam domains	Gene Ontology - BLAST	Gene Ontology - Pfam	Shell matrix protein reciprocol hit?	Likely identified in Le Luyer et al 2019?	Likely signalling function?	Likely transcription factor?
c101215_g1_i1	115.042	-6.1171	1.17665	-5.19874	2.01e-07	0.00356084	.	.	.	.	No	No	No	No
c53363_g1_i1	126.276	-3.28372	0.648976	-5.05985	4.2e-07	0.00372326	WFD18_RAT^WFD18_RAT^Q:118-315,H:3-73^43.662%ID^E:7.73e-10^RecName: Full=WAP four-disulfide core domain protein 18;^Eukaryota; Metazoa; Chordata; Craniata; Vertebrata; Euteleostomi; Mammalia; Eutheria; Euarchontoglires; Glires; Rodentia; Sciurognathi; Muroidea; Muridae; Murinae; Rattus	.	GO:0005576^cellular_component^extracellular region`GO:0030414^molecular_function^peptidase inhibitor activity	.	No	No	No	No
c58764_g1_i2	63.1855	2.33802	0.483823	4.83238	1.35e-06	0.00798099	LAZA_SCHAM^LAZA_SCHAM^Q:85-558,H:1-157^34.591%ID^E:1.64e-22^RecName: Full=Lazarillo protein;^Eukaryota; Metazoa; Ecdysozoa; Arthropoda; Hexapoda; Insecta; Pterygota; Neoptera; Orthopteroidea; Orthoptera; Caelifera; Acridomorpha; Acridoidea; Acrididae; Cyrtacanthacridinae; Schistocerca	PF08212.11^Lipocalin_2^Lipocalin-like domain^39-159^E:9e-15`PF00061.22^Lipocalin^Lipocalin / cytosolic fatty-acid binding protein family^44-157^E:2.4e-08	GO:0031225^cellular_component^anchored component of membrane`GO:0005886^cellular_component^plasma membrane`GO:0031409^molecular_function^pigment binding`GO:0030154^biological_process^cell differentiation`GO:0007399^biological_process^nervous system development	.	No	No	No	No
c49420_g1_i1	77.997	4.44971	0.942893	4.71921	2.37e-06	0.00875993	.	.	.	.	No	No	No	No
c71948_g1_i2	83.1398	-3.28259	0.696829	-4.71076	2.47e-06	0.00875993	.	PF16977.4^ApeC^C-terminal domain of apextrin^209-416^E:1.9e-51	.	.	No	No	No	No
c67428_g1_i1	8.64901	4.19189	0.900134	4.65695	3.21e-06	0.0094923	.	.	.	.	No	No	No	No
c63138_g1_i3	100.453	-4.9142	1.0662	-4.6091	4.04e-06	0.0102531	SPON1_RAT^SPON1_RAT^Q:57-1010,H:352-714^24.409%ID^E:8.55e-11^RecName: Full=Spondin-1;^Eukaryota; Metazoa; Chordata; Craniata; Vertebrata; Euteleostomi; Mammalia; Eutheria; Euarchontoglires; Glires; Rodentia; Sciurognathi; Muroidea; Muridae; Murinae; Rattus`SPON1_RAT^SPON1_RAT^Q:21-914,H:438-765^25.217%ID^E:2.67e-10^RecName: Full=Spondin-1;^Eukaryota; Metazoa; Chordata; Craniata; Vertebrata; Eutel…	PF00090.18^TSP_1^Thrombospondin type 1 domain^81-119^E:0.066`PF00092.27^VWA^von Willebrand factor type A domain^194-381^E:2e-20`PF13519.5^VWA_2^von Willebrand factor type A domain^195-318^E:5.4e-12	GO:0005578^cellular_component^proteinaceous extracellular matrix`GO:0046872^molecular_function^metal ion binding`GO:0007155^biological_process^cell adhesion	.	No	No	No	No
c73844_g1_i2	33.6631	1.46041	0.324272	4.50366	6.68e-06	0.0148169	RERG_HUMAN^RERG_HUMAN^Q:938-1531,H:1-195^45.96%ID^E:1.33e-46^RecName: Full=Ras-related and estrogen-regulated growth inhibitor;^Eukaryota; Metazoa; Chordata; Craniata; Vertebrata; Euteleostomi; Mammalia; Eutheria; Euarchontoglires; Primates; Haplorrhini; Catarrhini; Hominidae; Homo	PF00025.20^Arf^ADP-ribosylation factor family^24-147^E:1.4e-05`PF00071.21^Ras^Ras family^28-178^E:1.2e-36`PF08477.12^Roc^Ras of Complex, Roc, domain of DAPkinase^28-141^E:4.9e-12	GO:0005829^cellular_component^cytosol`GO:0016020^cellular_component^membrane`GO:0005634^cellular_component^nucleus`GO:0030331^molecular_function^estrogen receptor binding`GO:0019003^molecular_function^GDP binding`GO:0005525^molecular_function^GTP binding`GO:0003924^molecular_function^GTPase activity`GO:0030308^biological_process^negative regulation of cell growth`GO:0008285^biological_process^neg…	GO:0005525^molecular_function^GTP binding`GO:0003924^molecular_function^GTPase activity`GO:0007264^biological_process^small GTPase mediated signal transduction	No	No	Yes	No
c131925_g1_i1	30.1068	-6.14248	1.40745	-4.36425	1.28e-05	0.0251533	.	.	.	.	No	No	No	No
c73128_g2_i3	1024.83	-1.59283	0.369636	-4.30919	1.64e-05	0.0290794	TBA3_RAT^TBA3_RAT^Q:130-1425,H:1-432^99.537%ID^E:0^RecName: Full=Tubulin alpha-3 chain;^Eukaryota; Metazoa; Chordata; Craniata; Vertebrata; Euteleostomi; Mammalia; Eutheria; Euarchontoglires; Glires; Rodentia; Sciurognathi; Muroidea; Muridae; Murinae; Rattus	PF00091.24^Tubulin^Tubulin/FtsZ family, GTPase domain^3-213^E:3.9e-68`PF03953.16^Tubulin_C^Tubulin C-terminal domain^263-391^E:2.9e-51	GO:0005881^cellular_component^cytoplasmic microtubule`GO:0036464^cellular_component^cytoplasmic ribonucleoprotein granule`GO:0070062^cellular_component^extracellular exosome`GO:0005874^cellular_component^microtubule`GO:0043209^cellular_component^myelin sheath`GO:0005634^cellular_component^nucleus`GO:0055037^cellular_component^recycling endosome`GO:0005525^molecular_function^GTP binding`GO:0003924…	GO:0003924^molecular_function^GTPase activity	Yes	No	No	No
c56514_g1_i1	4.36677	2.38665	0.55965	4.26454	2e-05	0.0291316	.	.	.	.	No	No	No	No
c31660_g1_i1	53.2279	5.68979	1.33865	4.25039	2.13e-05	0.0291316	.	PF00538.18^Linker_histone^linker histone H1 and H5 family^39-105^E:1.8e-15	GO:0000786^cellular_component^nucleosome`GO:0005634^cellular_component^nucleus`GO:0003677^molecular_function^DNA binding`GO:0030154^biological_process^cell differentiation`GO:0030261^biological_process^chromosome condensation`GO:0007275^biological_process^multicellular organism development`GO:0006334^biological_process^nucleosome assembly`GO:0007283^biological_process^spermatogenesis	GO:0003677^molecular_function^DNA binding`GO:0006334^biological_process^nucleosome assembly`GO:0000786^cellular_component^nucleosome`GO:0005634^cellular_component^nucleus	No	No	No	No
c67117_g1_i2	7.7844	-4.40153	1.03149	-4.26717	1.98e-05	0.0291316	NPT2B_RAT^NPT2B_RAT^Q:299-1912,H:109-612^51.386%ID^E:2.95e-146^RecName: Full=Sodium-dependent phosphate transport protein 2B;^Eukaryota; Metazoa; Chordata; Craniata; Vertebrata; Euteleostomi; Mammalia; Eutheria; Euarchontoglires; Glires; Rodentia; Sciurognathi; Muroidea; Muridae; Murinae; Rattus	PF02690.14^Na_Pi_cotrans^Na+/Pi-cotransporter^101-196^E:7.8e-22`PF02690.14^Na_Pi_cotrans^Na+/Pi-cotransporter^399-524^E:8.1e-13	GO:0016324^cellular_component^apical plasma membrane`GO:0031526^cellular_component^brush border membrane`GO:0005737^cellular_component^cytoplasm`GO:0016021^cellular_component^integral component of membrane`GO:0031528^cellular_component^microvillus membrane`GO:0031982^cellular_component^vesicle`GO:0019904^molecular_function^protein domain specific binding`GO:0015321^molecular_function^sodium-depen…	GO:0015321^molecular_function^sodium-dependent phosphate transmembrane transporter activity`GO:0044341^biological_process^sodium-dependent phosphate transport`GO:0016020^cellular_component^membrane	No	No	No	No
c38034_g1_i1	3.61153	-3.86809	0.929083	-4.16334	3.14e-05	0.0326732	.	.	.	.	No	No	No	No
c65999_g4_i9	82.5699	1.62434	0.391303	4.1511	3.31e-05	0.0326732	.	.	.	.	No	No	No	No
c70347_g5_i1	11.6528	0.979548	0.236038	4.14996	3.33e-05	0.0326732	.	.	.	.	No	No	No	No
c75218_g1_i2	6.2981	1.64012	0.396321	4.13836	3.5e-05	0.0326732	ANPRA_RAT^ANPRA_RAT^Q:412-3510,H:54-1052^35.674%ID^E:9.56e-172^RecName: Full=Atrial natriuretic peptide receptor 1;^Eukaryota; Metazoa; Chordata; Craniata; Vertebrata; Euteleostomi; Mammalia; Eutheria; Euarchontoglires; Glires; Rodentia; Sciurognathi; Muroidea; Muridae; Murinae; Rattus	PF01094.27^ANF_receptor^Receptor family ligand binding region^62-413^E:2.2e-37`PF00069.24^Pkinase^Protein kinase domain^592-836^E:5.8e-33`PF07714.16^Pkinase_Tyr^Protein tyrosine kinase^599-832^E:1.1e-34`PF07701.13^HNOBA^Heme NO binding associated^868-898^E:3.2e-05`PF00211.19^Guanylate_cyc^Adenylate and Guanylate cyclase catalytic domain^905-1089^E:5.8e-63	GO:0008074^cellular_component^guanylate cyclase complex, soluble`GO:0016021^cellular_component^integral component of membrane`GO:0005886^cellular_component^plasma membrane`GO:0043235^cellular_component^receptor complex`GO:0005524^molecular_function^ATP binding`GO:0005525^molecular_function^GTP binding`GO:0004383^molecular_function^guanylate cyclase activity`GO:0016941^molecular_function^natriuret…	GO:0004672^molecular_function^protein kinase activity`GO:0005524^molecular_function^ATP binding`GO:0006468^biological_process^protein phosphorylation`GO:0004383^molecular_function^guanylate cyclase activity`GO:0006182^biological_process^cGMP biosynthetic process`GO:0016849^molecular_function^phosphorus-oxygen lyase activity`GO:0009190^biological_process^cyclic nucleotide biosynthetic process`GO:0…	No	No	Yes	No
c73701_g1_i2	48.8554	2.99752	0.723789	4.14144	3.45e-05	0.0326732	PWAP_HALAI^PWAP_HALAI^Q:272-541,H:62-151^47.312%ID^E:3.9e-09^RecName: Full=Perlwapin {ECO:0000250|UniProtKB:P84811};^Eukaryota; Metazoa; Lophotrochozoa; Mollusca; Gastropoda; Vetigastropoda; Haliotoidea; Haliotidae; Haliotis	PF00095.20^WAP^WAP-type (Whey Acidic Protein) 'four-disulfide core'^71-112^E:4e-09`PF00095.20^WAP^WAP-type (Whey Acidic Protein) 'four-disulfide core'^114-154^E:1e-10	GO:0005576^cellular_component^extracellular region`GO:0030414^molecular_function^peptidase inhibitor activity	GO:0030414^molecular_function^peptidase inhibitor activity`GO:0005576^cellular_component^extracellular region	Yes	Yes	No	No
c64764_g1_i1	10.5258	-3.19844	0.771134	-4.14771	3.36e-05	0.0326732	SAXO1_HUMAN^SAXO1_HUMAN^Q:155-1486,H:4-446^32.589%ID^E:5.44e-61^RecName: Full=Stabilizer of axonemal microtubules 1 {ECO:0000303|PubMed:25673876};^Eukaryota; Metazoa; Chordata; Craniata; Vertebrata; Euteleostomi; Mammalia; Eutheria; Euarchontoglires; Primates; Haplorrhini; Catarrhini; Hominidae; Homo	.	GO:0005879^cellular_component^axonemal microtubule`GO:0005814^cellular_component^centriole`GO:0036064^cellular_component^ciliary basal body`GO:0031514^cellular_component^motile cilium`GO:0036126^cellular_component^sperm flagellum`GO:0008017^molecular_function^microtubule binding`GO:0030030^biological_process^cell projection organization`GO:0070417^biological_process^cellular response to cold`GO:0…	.	No	No	No	No
c73060_g1_i1	10.7525	1.46185	0.354311	4.12589	3.69e-05	0.0327707	ECE_LOCMI^ECE_LOCMI^Q:299-2509,H:7-727^25.665%ID^E:1.28e-67^RecName: Full=Endothelin-converting enzyme homolog {ECO:0000305|PubMed:12752656, ECO:0000312|EMBL:AAN73018.1};^Eukaryota; Metazoa; Ecdysozoa; Arthropoda; Hexapoda; Insecta; Pterygota; Neoptera; Orthopteroidea; Orthoptera; Caelifera; Acridomorpha; Acridoidea; Acrididae; Oedipodinae; Locusta	PF05649.12^Peptidase_M13_N^Peptidase family M13^95-496^E:1.5e-66`PF01431.20^Peptidase_M13^Peptidase family M13^564-768^E:2.3e-22	GO:0016021^cellular_component^integral component of membrane`GO:0005622^cellular_component^intracellular`GO:0046872^molecular_function^metal ion binding`GO:0004222^molecular_function^metalloendopeptidase activity`GO:0035556^biological_process^intracellular signal transduction`GO:0007218^biological_process^neuropeptide signaling pathway`GO:0003016^biological_process^respiratory system process	GO:0006508^biological_process^proteolysis`GO:0004222^molecular_function^metalloendopeptidase activity	No	No	Yes	No
c108456_g1_i1	5.37062	-4.85396	1.18552	-4.09436	4.23e-05	0.0341498	.	.	.	.	No	No	No	No
c51329_g1_i1	6.57706	-2.99613	0.730166	-4.10336	4.07e-05	0.0341498	.	.	.	.	No	No	No	No
c66983_g1_i1	39.4411	-0.570291	0.139863	-4.07751	4.55e-05	0.0349952	.	.	.	.	No	No	No	No
c67202_g2_i2	18.1487	0.762327	0.187375	4.06846	4.73e-05	0.0349952	.	.	.	.	No	No	No	No
c50906_g1_i1	5.42807	4.33088	1.08382	3.99594	6.44e-05	0.0386578	.	.	.	.	No	No	No	No
c54613_g1_i2	46.8932	-2.96317	0.742532	-3.99063	6.59e-05	0.0386578	.	.	.	.	No	No	No	No
c60664_g1_i2	115.695	2.82879	0.710414	3.9819	6.84e-05	0.0386578	.	.	.	.	No	No	No	No
c71079_g2_i1	77.3293	-2.28315	0.570025	-4.00536	6.19e-05	0.0386578	.	.	.	.	No	No	No	No
c72013_g3_i1	12.8831	2.14119	0.537784	3.9815	6.85e-05	0.0386578	CHIA_RAT^CHIA_RAT^Q:193-1371,H:4-388^44.081%ID^E:2.74e-113^RecName: Full=Acidic mammalian chitinase;^Eukaryota; Metazoa; Chordata; Craniata; Vertebrata; Euteleostomi; Mammalia; Eutheria; Euarchontoglires; Glires; Rodentia; Sciurognathi; Muroidea; Muridae; Murinae; Rattus	PF00704.27^Glyco_hydro_18^Glycosyl hydrolases family 18^28-370^E:3.2e-87	GO:0005737^cellular_component^cytoplasm`GO:0005576^cellular_component^extracellular region`GO:0005615^cellular_component^extracellular space`GO:0008061^molecular_function^chitin binding`GO:0004568^molecular_function^chitinase activity`GO:0006915^biological_process^apoptotic process`GO:0006032^biological_process^chitin catabolic process`GO:0002376^biological_process^immune system process`GO:000027…	GO:0005975^biological_process^carbohydrate metabolic process	Yes	Yes	No	No
c61743_g1_i2	234.134	-1.92148	0.483113	-3.97729	6.97e-05	0.0386578	PPIB_CHICK^PPIB_CHICK^Q:175-738,H:33-206^51.064%ID^E:1.73e-44^RecName: Full=Peptidyl-prolyl cis-trans isomerase B;^Eukaryota; Metazoa; Chordata; Craniata; Vertebrata; Euteleostomi; Archelosauria; Archosauria; Dinosauria; Saurischia; Theropoda; Coelurosauria; Aves; Neognathae; Galloanserae; Galliformes; Phasianidae; Phasianinae; Gallus	PF00160.20^Pro_isomerase^Cyclophilin type peptidyl-prolyl cis-trans isomerase/CLD^45-200^E:2e-43	GO:0005788^cellular_component^endoplasmic reticulum lumen`GO:0032991^cellular_component^macromolecular complex`GO:0042470^cellular_component^melanosome`GO:0003755^molecular_function^peptidyl-prolyl cis-trans isomerase activity`GO:0032403^molecular_function^protein complex binding`GO:0061077^biological_process^chaperone-mediated protein folding`GO:0000413^biological_process^protein peptidyl-prolyl…	GO:0003755^molecular_function^peptidyl-prolyl cis-trans isomerase activity`GO:0000413^biological_process^protein peptidyl-prolyl isomerization`GO:0006457^biological_process^protein folding	No	No	No	No
c73712_g1_i1	16.0565	1.83006	0.453962	4.03131	5.55e-05	0.0386578	TX31_CONTE^TX31_CONTE^Q:825-1628,H:24-296^37.153%ID^E:3.5e-37^RecName: Full=Cysteine-rich venom protein;^Eukaryota; Metazoa; Lophotrochozoa; Mollusca; Gastropoda; Caenogastropoda; Hypsogastropoda; Neogastropoda; Conoidea; Conidae; Conus	PF00188.25^CAP^Cysteine-rich secretory protein family^201-332^E:1e-22	GO:0005576^cellular_component^extracellular region`GO:0008233^molecular_function^peptidase activity	.	No	Yes	No	No
c73011_g1_i4	10.9017	-1.6929	0.421419	-4.01713	5.89e-05	0.0386578	VWA3B_HUMAN^VWA3B_HUMAN^Q:532-966,H:1033-1176^31.724%ID^E:7.52e-16^RecName: Full=von Willebrand factor A domain-containing protein 3B;^Eukaryota; Metazoa; Chordata; Craniata; Vertebrata; Euteleostomi; Mammalia; Eutheria; Euarchontoglires; Primates; Haplorrhini; Catarrhini; Hominidae; Homo	PF15057.5^DUF4537^Domain of unknown function (DUF4537)^91-218^E:5.9e-29`PF15057.5^DUF4537^Domain of unknown function (DUF4537)^555-673^E:2.9e-28`PF15057.5^DUF4537^Domain of unknown function (DUF4537)^682-797^E:2.6e-24	.	.	No	No	No	No
c72764_g3_i1	3.73406	-1.92354	0.484856	-3.96723	7.27e-05	0.0391041	.	.	.	.	No	No	No	No
c58716_g1_i1	9.57265	-2.08084	0.531115	-3.91786	8.93e-05	0.0417227	.	.	.	.	No	No	No	No
c60479_g1_i1	13.3229	2.62191	0.666957	3.93116	8.45e-05	0.0417227	.	.	.	.	Yes	Yes	No	No
c75731_g2_i11	82.8355	-2.1375	0.544701	-3.92416	8.7e-05	0.0417227	.	.	.	.	No	No	No	No
c63073_g1_i1	14.84	-2.30218	0.585258	-3.93362	8.37e-05	0.0417227	CQ098_HUMAN^CQ098_HUMAN^Q:394-816,H:6-146^49.645%ID^E:1.58e-31^RecName: Full=Uncharacterized protein C17orf98;^Eukaryota; Metazoa; Chordata; Craniata; Vertebrata; Euteleostomi; Mammalia; Eutheria; Euarchontoglires; Primates; Haplorrhini; Catarrhini; Hominidae; Homo	PF15075.5^DUF4542^Domain of unknown function (DUF4542)^36-169^E:5.8e-52	.	.	No	No	No	No
c75828_g1_i1	16.8624	-3.02812	0.771342	-3.92578	8.65e-05	0.0417227	PKHL1_MOUSE^PKHL1_MOUSE^Q:2-5914,H:2243-4186^41.733%ID^E:0^RecName: Full=Fibrocystin-L;^Eukaryota; Metazoa; Chordata; Craniata; Vertebrata; Euteleostomi; Mammalia; Eutheria; Euarchontoglires; Glires; Rodentia; Sciurognathi; Muroidea; Muridae; Murinae; Mus; Mus`PKHL1_MOUSE^PKHL1_MOUSE^Q:2369-3409,H:2176-2525^31.496%ID^E:3.25e-32^RecName: Full=Fibrocystin-L;^Eukaryota; Metazoa; Chordata; Craniata; …	PF10162.8^G8^G8 domain^1-60^E:4.1e-15`PF10162.8^G8^G8 domain^810-937^E:4.6e-26`PF13229.5^Beta_helix^Right handed beta helix region^1099-1267^E:4.3e-08	GO:0005929^cellular_component^cilium`GO:0016021^cellular_component^integral component of membrane	.	No	No	No	No
c66069_g1_i1	9.4184	2.42328	0.62386	3.88433	0.000102611	0.0455262	.	.	.	.	No	Yes	No	No
c71079_g1_i2	16.2882	-3.0791	0.792527	-3.88516	0.000102262	0.0455262	LMTD1_MACFA^LMTD1_MACFA^Q:2817-3620,H:110-383^35.714%ID^E:3.9e-44^RecName: Full=Lamin tail domain-containing protein 1;^Eukaryota; Metazoa; Chordata; Craniata; Vertebrata; Euteleostomi; Mammalia; Eutheria; Euarchontoglires; Primates; Haplorrhini; Catarrhini; Cercopithecidae; Cercopithecinae; Macaca	PF00038.20^Filament^Intermediate filament protein^73-435^E:1.3e-28`PF00932.18^LTD^Lamin Tail Domain^710-819^E:2.4e-14	GO:0005882^cellular_component^intermediate filament`GO:0005198^molecular_function^structural molecule activity	GO:0005198^molecular_function^structural molecule activity`GO:0005882^cellular_component^intermediate filament	No	No	No	No
c72083_g2_i2	6.3214	-2.78297	0.717706	-3.8776	0.000105494	0.0456633	CP135_HUMAN^CP135_HUMAN^Q:1108-3069,H:480-1126^41.985%ID^E:5.66e-155^RecName: Full=Centrosomal protein of 135 kDa;^Eukaryota; Metazoa; Chordata; Craniata; Vertebrata; Euteleostomi; Mammalia; Eutheria; Euarchontoglires; Primates; Haplorrhini; Catarrhini; Hominidae; Homo`CP135_HUMAN^CP135_HUMAN^Q:4-906,H:179-469^37.987%ID^E:1.21e-50^RecName: Full=Centrosomal protein of 135 kDa;^Eukaryota; Metazoa; …	.	GO:0005814^cellular_component^centriole`GO:0005813^cellular_component^centrosome`GO:0005829^cellular_component^cytosol`GO:0008022^molecular_function^protein C-terminus binding`GO:0007099^biological_process^centriole replication`GO:0010457^biological_process^centriole-centriole cohesion`GO:0097711^biological_process^ciliary basal body docking`GO:0000086^biological_process^G2/M transition of mitoti…	.	No	No	No	No
c59265_g1_i1	133.731	-3.14945	0.813963	-3.86928	0.000109158	0.0461245	.	.	.	.	No	No	No	No
c73898_g1_i1	14.6572	2.04308	0.530804	3.84903	0.000118588	0.0489437	.	.	.	.	No	No	No	No

## Sheet: Table S2 - Calcification
Table S2. Transcripts differentially expressed between sacs producing pearls with 'calcification' and those without
Transcript ID	Mean of normalised counts - all samples	No defect vs with defect					Trinotate transcript annotation
		log2 Fold change	log2 fold change standard error	Wald statistic	Wald test p-value	Adjusted P-value	Swissprot top BLASTX hit	Pfam domains	Gene Ontology - BLAST	Gene Ontology - Pfam	Shell matrix protein reciprocol hit?	Likely identified in Le Luyer et al 2019?	Likely signalling function?	Likely transcription factor?
c74302_g1_i5	33.8171	2.49489	0.460977	5.41218	6.23e-08	0.000775898	LRP1_HUMAN^LRP1_HUMAN^Q:147-1316,H:1156-1580^34.713%ID^E:3.56e-67^RecName: Full=Prolow-density lipoprotein receptor-related protein 1;^Eukaryota; Metazoa; Chordata; Craniata; Vertebrata; Euteleostomi; Mammalia; Eutheria; Euarchontoglires; Primates; Haplorrhini; Catarrhini; Hominidae; Homo`LRP1_HUMAN^LRP1_HUMAN^Q:129-1325,H:2909-3335^34.298%ID^E:4.75e-66^RecName: Full=Prolow-density lipoprotein re…	PF00057.17^Ldl_recept_a^Low-density lipoprotein receptor domain class A^84-120^E:6.7e-09`PF00058.16^Ldl_recept_b^Low-density lipoprotein receptor repeat class B^210-250^E:5.9e-12`PF00058.16^Ldl_recept_b^Low-density lipoprotein receptor repeat class B^255-295^E:0.00023`PF00058.16^Ldl_recept_b^Low-density lipoprotein receptor repeat class B^299-340^E:6.4e-09`PF00100.22^Zona_pellucida^Zona pellucida…	GO:0005905^cellular_component^clathrin-coated pit`GO:0030136^cellular_component^clathrin-coated vesicle`GO:0005829^cellular_component^cytosol`GO:0030425^cellular_component^dendrite`GO:0030666^cellular_component^endocytic vesicle membrane`GO:0005768^cellular_component^endosome`GO:0005925^cellular_component^focal adhesion`GO:0005887^cellular_component^integral component of plasma membrane`GO:000576…	GO:0005515^molecular_function^protein binding	No	No	Yes	No
c40712_g1_i2	8.89148	4.05394	0.839597	4.82843	1.38e-06	0.00326892	.	.	.	.	No	No	No	No
c53362_g1_i1	24.1566	-3.88576	0.830502	-4.67881	2.89e-06	0.00326892	TEKT4_XENLA^TEKT4_XENLA^Q:133-1488,H:1-446^53.846%ID^E:6.79e-154^RecName: Full=Tektin-4;^Eukaryota; Metazoa; Chordata; Craniata; Vertebrata; Euteleostomi; Amphibia; Batrachia; Anura; Pipoidea; Pipidae; Xenopodinae; Xenopus; Xenopus	PF03148.13^Tektin^Tektin family^61-443^E:1.3e-148	GO:0005929^cellular_component^cilium`GO:0005737^cellular_component^cytoplasm`GO:0005874^cellular_component^microtubule	.	No	No	No	No
c57004_g1_i1	20.2377	-3.43176	0.730934	-4.69504	2.67e-06	0.00326892	CF161_DANRE^CF161_DANRE^Q:118-939,H:4-275^41.786%ID^E:1.08e-64^RecName: Full=Cilia- and flagella-associated protein 161 {ECO:0000250|UniProtKB:Q6P656};^Eukaryota; Metazoa; Chordata; Craniata; Vertebrata; Euteleostomi; Actinopterygii; Neopterygii; Teleostei; Ostariophysi; Cypriniformes; Cyprinidae; Danio	.	GO:0031514^cellular_component^motile cilium`GO:0060271^biological_process^cilium assembly	.	No	No	No	No
c59743_g1_i1	102.233	-3.50965	0.735324	-4.77293	1.82e-06	0.00326892	CFA57_MOUSE^CFA57_MOUSE^Q:537-3719,H:153-1237^56.697%ID^E:0^RecName: Full=Cilia- and flagella-associated protein 57 {ECO:0000312|MGI:MGI:2686209};^Eukaryota; Metazoa; Chordata; Craniata; Vertebrata; Euteleostomi; Mammalia; Eutheria; Euarchontoglires; Glires; Rodentia; Sciurognathi; Muroidea; Muridae; Murinae; Mus; Mus`CFA57_MOUSE^CFA57_MOUSE^Q:83-517,H:1-148^54.73%ID^E:1.33e-42^RecName: Full=Cili…	PF00400.31^WD40^WD domain, G-beta repeat^168-198^E:0.017`PF00400.31^WD40^WD domain, G-beta repeat^284-321^E:0.007	.	GO:0005515^molecular_function^protein binding	No	No	No	No
c60429_g2_i1	34.5125	-3.27392	0.697779	-4.69191	2.71e-06	0.00326892	IQUB_MACFA^IQUB_MACFA^Q:636-2549,H:127-761^54.859%ID^E:0^RecName: Full=IQ and ubiquitin-like domain-containing protein;^Eukaryota; Metazoa; Chordata; Craniata; Vertebrata; Euteleostomi; Mammalia; Eutheria; Euarchontoglires; Primates; Haplorrhini; Catarrhini; Cercopithecidae; Cercopithecinae; Macaca	PF00240.22^ubiquitin^Ubiquitin family^197-258^E:3.4e-07	GO:0030030^biological_process^cell projection organization	GO:0005515^molecular_function^protein binding	No	No	No	No
c62532_g1_i1	88.581	-3.52995	0.747042	-4.72524	2.3e-06	0.00326892	THEGL_HUMAN^THEGL_HUMAN^Q:167-1072,H:168-465^30.408%ID^E:7.22e-22^RecName: Full=Testicular haploid expressed gene protein-like;^Eukaryota; Metazoa; Chordata; Craniata; Vertebrata; Euteleostomi; Mammalia; Eutheria; Euarchontoglires; Primates; Haplorrhini; Catarrhini; Hominidae; Homo	PF14912.5^THEG^Testicular haploid expressed repeat^19-70^E:0.081`PF14912.5^THEG^Testicular haploid expressed repeat^106-130^E:0.56`PF14912.5^THEG^Testicular haploid expressed repeat^141-199^E:1e-11`PF14912.5^THEG^Testicular haploid expressed repeat^211-268^E:4.1e-15`PF14912.5^THEG^Testicular haploid expressed repeat^247-305^E:1.6e-12	.	.	No	No	No	No
c64390_g1_i1	50.0737	-3.84304	0.783869	-4.90265	9.46e-07	0.00326892	CFA77_DANRE^CFA77_DANRE^Q:189-905,H:6-237^38.174%ID^E:6.77e-42^RecName: Full=Cilia- and flagella-associated protein 77 {ECO:0000305};^Eukaryota; Metazoa; Chordata; Craniata; Vertebrata; Euteleostomi; Actinopterygii; Neopterygii; Teleostei; Ostariophysi; Cypriniformes; Cyprinidae; Danio	PF14825.5^DUF4483^Domain of unknown function (DUF4483)^24-179^E:1.1e-49	GO:0005929^cellular_component^cilium	.	No	No	No	No
c65902_g1_i1	28.4962	-2.94951	0.593618	-4.96871	6.74e-07	0.00326892	KAD7_HUMAN^KAD7_HUMAN^Q:219-2303,H:16-721^51.061%ID^E:0^RecName: Full=Adenylate kinase 7;^Eukaryota; Metazoa; Chordata; Craniata; Vertebrata; Euteleostomi; Mammalia; Eutheria; Euarchontoglires; Primates; Haplorrhini; Catarrhini; Hominidae; Homo	PF00406.21^ADK^Adenylate kinase^439-559^E:7e-08`PF05186.12^Dpy-30^Dpy-30 motif^661-702^E:2e-18	GO:0005829^cellular_component^cytosol`GO:0004017^molecular_function^adenylate kinase activity`GO:0005524^molecular_function^ATP binding`GO:0004127^molecular_function^cytidylate kinase activity`GO:0004550^molecular_function^nucleoside diphosphate kinase activity`GO:0019206^molecular_function^nucleoside kinase activity`GO:0030030^biological_process^cell projection organization`GO:0015949^biological…	.	No	No	No	No
c66652_g3_i1	35.4216	-3.1435	0.653951	-4.80693	1.53e-06	0.00326892	DYHC_TRIGR^DYHC_TRIGR^Q:127-13494,H:6-4466^74.356%ID^E:0^RecName: Full=Dynein beta chain, ciliary;^Eukaryota; Metazoa; Echinodermata; Eleutherozoa; Echinozoa; Echinoidea; Euechinoidea; Echinacea; Temnopleuroida; Toxopneustidae; Tripneustes	PF08385.11^DHC_N1^Dynein heavy chain, N-terminal region 1^190-765^E:2.3e-176`PF08393.12^DHC_N2^Dynein heavy chain, N-terminal region 2^1269-1675^E:9.6e-134`PF12774.6^AAA_6^Hydrolytic ATP binding site of dynein motor region D1^1809-2039^E:4.2e-145`PF07728.13^AAA_5^AAA domain (dynein-related subfamily)^2124-2257^E:3.9e-10`PF12775.6^AAA_7^P-loop containing dynein motor region D3^2416-2686^E:5.8e-151…	GO:0005737^cellular_component^cytoplasm`GO:0030286^cellular_component^dynein complex`GO:0005874^cellular_component^microtubule`GO:0031514^cellular_component^motile cilium`GO:0005524^molecular_function^ATP binding`GO:0016887^molecular_function^ATPase activity`GO:0003777^molecular_function^microtubule motor activity`GO:0030030^biological_process^cell projection organization`GO:0007018^biological_pr…	GO:0005524^molecular_function^ATP binding`GO:0016887^molecular_function^ATPase activity`GO:0003777^molecular_function^microtubule motor activity`GO:0007018^biological_process^microtubule-based movement`GO:0030286^cellular_component^dynein complex	No	No	No	No
c67409_g1_i5	15.2163	-4.30864	0.905218	-4.75979	1.94e-06	0.00326892	.	.	.	.	No	No	No	No
c55108_g1_i1	55.1598	-2.9625	0.648965	-4.56496	5e-06	0.00329605	IDLC_STRPU^IDLC_STRPU^Q:81-851,H:1-259^86.1%ID^E:1.01e-143^RecName: Full=33 kDa inner dynein arm light chain, axonemal;^Eukaryota; Metazoa; Echinodermata; Eleutherozoa; Echinozoa; Echinoidea; Euechinoidea; Echinacea; Echinoida; Strongylocentrotidae; Strongylocentrotus	PF10211.8^Ax_dynein_light^Axonemal dynein light chain^66-250^E:2.1e-94	GO:0030286^cellular_component^dynein complex`GO:0003774^molecular_function^motor activity	.	No	No	No	No
c58275_g1_i1	98.0048	-3.05702	0.668623	-4.57211	4.83e-06	0.00329605	RIBC2_HUMAN^RIBC2_HUMAN^Q:322-1242,H:4-309^47.883%ID^E:6.83e-59^RecName: Full=RIB43A-like with coiled-coils protein 2;^Eukaryota; Metazoa; Chordata; Craniata; Vertebrata; Euteleostomi; Mammalia; Eutheria; Euarchontoglires; Primates; Haplorrhini; Catarrhini; Hominidae; Homo	PF05914.11^RIB43A^RIB43A^5-379^E:6.3e-154	GO:0005634^cellular_component^nucleus	.	No	No	No	No
c59763_g1_i1	33.5577	-3.80578	0.820586	-4.63788	3.52e-06	0.00329605	ROP1L_XENLA^ROP1L_XENLA^Q:336-986,H:3-219^57.604%ID^E:3.72e-85^RecName: Full=Ropporin-1-like protein;^Eukaryota; Metazoa; Chordata; Craniata; Vertebrata; Euteleostomi; Amphibia; Batrachia; Anura; Pipoidea; Pipidae; Xenopodinae; Xenopus; Xenopus	.	.	.	No	No	No	No
c60370_g1_i1	60.1173	-3.10772	0.680959	-4.56373	5.03e-06	0.00329605	DRC1_XENLA^DRC1_XENLA^Q:83-2257,H:14-686^51.515%ID^E:0^RecName: Full=Dynein regulatory complex protein 1;^Eukaryota; Metazoa; Chordata; Craniata; Vertebrata; Euteleostomi; Amphibia; Batrachia; Anura; Pipoidea; Pipidae; Xenopodinae; Xenopus; Xenopus	PF14772.5^NYD-SP28^Sperm tail^87-187^E:3.6e-30`PF14775.5^NYD-SP28_assoc^Sperm tail C-terminal domain^656-715^E:1.2e-23	GO:0005930^cellular_component^axoneme`GO:0005737^cellular_component^cytoplasm`GO:0070286^biological_process^axonemal dynein complex assembly`GO:0071973^biological_process^bacterial-type flagellum-dependent cell motility`GO:0060285^biological_process^cilium-dependent cell motility	.	No	No	No	No
c70379_g2_i1	121.496	-2.92246	0.629514	-4.6424	3.44e-06	0.00329605	RSH6A_HUMAN^RSH6A_HUMAN^Q:833-1657,H:419-694^61.733%ID^E:2.97e-89^RecName: Full=Radial spoke head protein 6 homolog A;^Eukaryota; Metazoa; Chordata; Craniata; Vertebrata; Euteleostomi; Mammalia; Eutheria; Euarchontoglires; Primates; Haplorrhini; Catarrhini; Hominidae; Homo`RSH6A_HUMAN^RSH6A_HUMAN^Q:167-655,H:194-358^40.606%ID^E:1.88e-28^RecName: Full=Radial spoke head protein 6 homolog A;^Eukaryo…	PF04712.11^Radial_spoke^Radial spokehead-like protein^62-551^E:2.8e-203	GO:0005930^cellular_component^axoneme`GO:0005737^cellular_component^cytoplasm`GO:0001534^cellular_component^radial spoke`GO:0035082^biological_process^axoneme assembly`GO:0003341^biological_process^cilium movement	.	No	No	No	No
c71241_g2_i1	40.6004	-3.25033	0.710337	-4.57576	4.75e-06	0.00329605	PACRG_MOUSE^PACRG_MOUSE^Q:434-1117,H:14-241^78.947%ID^E:1.83e-118^RecName: Full=Parkin coregulated gene protein homolog;^Eukaryota; Metazoa; Chordata; Craniata; Vertebrata; Euteleostomi; Mammalia; Eutheria; Euarchontoglires; Glires; Rodentia; Sciurognathi; Muroidea; Muridae; Murinae; Mus; Mus	PF10274.8^ParcG^Parkin co-regulated protein^59-242^E:6.9e-85	GO:0044297^cellular_component^cell body`GO:0005929^cellular_component^cilium`GO:0005829^cellular_component^cytosol`GO:0005739^cellular_component^mitochondrion`GO:0043005^cellular_component^neuron projection`GO:0005634^cellular_component^nucleus`GO:0097225^cellular_component^sperm midpiece`GO:0031982^cellular_component^vesicle`GO:0003779^molecular_function^actin binding`GO:0043014^molecular_functi…	.	No	No	No	No
c73670_g1_i1	41.1644	-2.9878	0.654664	-4.56387	5.02e-06	0.00329605	KIF9_MOUSE^KIF9_MOUSE^Q:401-2779,H:5-790^52.346%ID^E:0^RecName: Full=Kinesin-like protein KIF9;^Eukaryota; Metazoa; Chordata; Craniata; Vertebrata; Euteleostomi; Mammalia; Eutheria; Euarchontoglires; Glires; Rodentia; Sciurognathi; Muroidea; Muridae; Murinae; Mus; Mus	PF16796.4^Microtub_bd^Microtubule binding^31-177^E:1.1e-22`PF00225.22^Kinesin^Kinesin motor domain^36-367^E:1.5e-95	GO:0005829^cellular_component^cytosol`GO:0005871^cellular_component^kinesin complex`GO:0005874^cellular_component^microtubule`GO:0002102^cellular_component^podosome`GO:0031982^cellular_component^vesicle`GO:0005524^molecular_function^ATP binding`GO:0016887^molecular_function^ATPase activity`GO:0003777^molecular_function^microtubule motor activity`GO:0046983^molecular_function^protein dimerization …	GO:0008017^molecular_function^microtubule binding`GO:0003777^molecular_function^microtubule motor activity`GO:0005524^molecular_function^ATP binding`GO:0007018^biological_process^microtubule-based movement	No	No	No	No
c77224_g1_i4	36.4889	-2.59534	0.564331	-4.59897	4.25e-06	0.00329605	SPG17_HUMAN^SPG17_HUMAN^Q:131-1942,H:18-646^38.486%ID^E:8.36e-101^RecName: Full=Sperm-associated antigen 17;^Eukaryota; Metazoa; Chordata; Craniata; Vertebrata; Euteleostomi; Mammalia; Eutheria; Euarchontoglires; Primates; Haplorrhini; Catarrhini; Hominidae; Homo`SPG17_HUMAN^SPG17_HUMAN^Q:3701-5722,H:1222-1941^31.03%ID^E:6.02e-83^RecName: Full=Sperm-associated antigen 17;^Eukaryota; Metazoa; Chor…	PF14874.5^PapD-like^Flagellar-associated PapD-like^2140-2241^E:1.1e-10	GO:1990716^cellular_component^axonemal central apparatus`GO:0005829^cellular_component^cytosol`GO:0005874^cellular_component^microtubule`GO:0031514^cellular_component^motile cilium`GO:0005654^cellular_component^nucleoplasm`GO:1904158^biological_process^axonemal central apparatus assembly`GO:0003351^biological_process^epithelial cilium movement	.	No	No	No	No
c56979_g1_i1	99.3993	-2.55405	0.564491	-4.52452	6.05e-06	0.00342895	ODF3A_XENTR^ODF3A_XENTR^Q:145-882,H:14-256^53.659%ID^E:3.26e-75^RecName: Full=Outer dense fiber protein 3;^Eukaryota; Metazoa; Chordata; Craniata; Vertebrata; Euteleostomi; Amphibia; Batrachia; Anura; Pipoidea; Pipidae; Xenopodinae; Xenopus; Silurana	PF07004.11^SHIPPO-rpt^Sperm-tail PG-rich repeat^96-125^E:9.1e-07`PF07004.11^SHIPPO-rpt^Sperm-tail PG-rich repeat^176-203^E:0.00019`PF07004.11^SHIPPO-rpt^Sperm-tail PG-rich repeat^213-240^E:0.004	GO:0005737^cellular_component^cytoplasm	.	No	No	No	No
c69055_g1_i1	46.1747	-2.56333	0.565298	-4.53447	5.77e-06	0.00342895	CFA61_HUMAN^CFA61_HUMAN^Q:1322-3904,H:376-1237^53.882%ID^E:0^RecName: Full=Cilia- and flagella-associated protein 61 {ECO:0000312|HGNC:HGNC:15872};^Eukaryota; Metazoa; Chordata; Craniata; Vertebrata; Euteleostomi; Mammalia; Eutheria; Euarchontoglires; Primates; Haplorrhini; Catarrhini; Hominidae; Homo`CFA61_HUMAN^CFA61_HUMAN^Q:91-915,H:1-274^52.518%ID^E:7.87e-75^RecName: Full=Cilia- and flagella-…	.	GO:0016491^molecular_function^oxidoreductase activity	.	No	No	No	No
c77150_g1_i2	88.5619	-2.05316	0.452957	-4.53279	5.82e-06	0.00342895	DYH2_MOUSE^DYH2_MOUSE^Q:2390-8518,H:2413-4455^73.203%ID^E:0^RecName: Full=Dynein heavy chain 2, axonemal;^Eukaryota; Metazoa; Chordata; Craniata; Vertebrata; Euteleostomi; Mammalia; Eutheria; Euarchontoglires; Glires; Rodentia; Sciurognathi; Muroidea; Muridae; Murinae; Mus; Mus`DYH2_MOUSE^DYH2_MOUSE^Q:4-2412,H:1621-2420^60.569%ID^E:0^RecName: Full=Dynein heavy chain 2, axonemal;^Eukaryota; Metazo…	PF12775.6^AAA_7^P-loop containing dynein motor region D3^30-293^E:5.7e-57`PF07728.13^AAA_5^AAA domain (dynein-related subfamily)^57-195^E:7.8e-16`PF12780.6^AAA_8^P-loop containing dynein motor region D4^377-641^E:1.6e-81`PF12777.6^MT^Microtubule-binding stalk of dynein motor^654-986^E:2.6e-60`PF12781.6^AAA_9^ATP-binding dynein motor region D5^1013-1234^E:1.1e-92`PF03028.14^Dynein_heavy^Dynein hea…	GO:0005737^cellular_component^cytoplasm`GO:0036156^cellular_component^inner dynein arm`GO:0005874^cellular_component^microtubule`GO:0031514^cellular_component^motile cilium`GO:0005524^molecular_function^ATP binding`GO:0016887^molecular_function^ATPase activity`GO:0003777^molecular_function^microtubule motor activity`GO:0007018^biological_process^microtubule-based movement	GO:0005524^molecular_function^ATP binding`GO:0016887^molecular_function^ATPase activity`GO:0003777^molecular_function^microtubule motor activity`GO:0007018^biological_process^microtubule-based movement`GO:0030286^cellular_component^dynein complex	Yes	No	No	No
c51635_g1_i1	37.5489	-3.39982	0.757206	-4.48995	7.12e-06	0.00362426	DJB13_MOUSE^DJB13_MOUSE^Q:47-994,H:1-315^63.291%ID^E:7.31e-141^RecName: Full=DnaJ homolog subfamily B member 13;^Eukaryota; Metazoa; Chordata; Craniata; Vertebrata; Euteleostomi; Mammalia; Eutheria; Euarchontoglires; Glires; Rodentia; Sciurognathi; Muroidea; Muridae; Murinae; Mus; Mus	PF00226.30^DnaJ^DnaJ domain^19-81^E:8.9e-25`PF01556.17^DnaJ_C^DnaJ C terminal domain^156-315^E:5.7e-42	GO:0005930^cellular_component^axoneme`GO:0005737^cellular_component^cytoplasm`GO:0031514^cellular_component^motile cilium`GO:0036126^cellular_component^sperm flagellum`GO:1904158^biological_process^axonemal central apparatus assembly`GO:0006457^biological_process^protein folding	.	No	No	No	No
c61543_g1_i1	11.015	-4.63618	1.03357	-4.48561	7.27e-06	0.00362426	CA194_DANRE^CA194_DANRE^Q:216-701,H:5-164^45.062%ID^E:1.26e-38^RecName: Full=Uncharacterized protein C1orf194 homolog;^Eukaryota; Metazoa; Chordata; Craniata; Vertebrata; Euteleostomi; Actinopterygii; Neopterygii; Teleostei; Ostariophysi; Cypriniformes; Cyprinidae; Danio	PF12494.7^DUF3695^Protein of unknown function (DUF3695)^34-129^E:2.3e-34	.	.	No	No	No	No
c71674_g1_i1	25.8226	-3.69531	0.82154	-4.49803	6.86e-06	0.00362426	.	.	.	.	No	No	No	No
c66473_g2_i1	25.923	-3.00607	0.675396	-4.45082	8.55e-06	0.00387993	TEKT3_HUMAN^TEKT3_HUMAN^Q:110-1630,H:1-489^52.756%ID^E:4.75e-175^RecName: Full=Tektin-3;^Eukaryota; Metazoa; Chordata; Craniata; Vertebrata; Euteleostomi; Mammalia; Eutheria; Euarchontoglires; Primates; Haplorrhini; Catarrhini; Hominidae; Homo	PF03148.13^Tektin^Tektin family^117-499^E:3e-152	GO:0002080^cellular_component^acrosomal membrane`GO:0070062^cellular_component^extracellular exosome`GO:0005874^cellular_component^microtubule`GO:0005634^cellular_component^nucleus`GO:0036126^cellular_component^sperm flagellum`GO:0060271^biological_process^cilium assembly`GO:0060294^biological_process^cilium movement involved in cell motility`GO:0030317^biological_process^flagellated sperm motili…	.	No	No	No	No
c72345_g1_i2	40.1134	-3.58207	0.803805	-4.45639	8.33e-06	0.00387993	CFA45_HUMAN^CFA45_HUMAN^Q:156-1739,H:25-543^48.593%ID^E:1.27e-95^RecName: Full=Cilia- and flagella-associated protein 45 {ECO:0000312|HGNC:HGNC:17229};^Eukaryota; Metazoa; Chordata; Craniata; Vertebrata; Euteleostomi; Mammalia; Eutheria; Euarchontoglires; Primates; Haplorrhini; Catarrhini; Hominidae; Homo	PF13868.5^TPH^Trichohyalin-plectin-homology domain^194-541^E:9.7e-87	GO:0005929^cellular_component^cilium`GO:0005654^cellular_component^nucleoplasm`GO:0005634^cellular_component^nucleus	.	No	No	No	No
c73935_g2_i1	57.635	-2.84335	0.63942	-4.44676	8.72e-06	0.00387993	MAAT1_MOUSE^MAAT1_MOUSE^Q:96-2270,H:15-738^55.83%ID^E:0^RecName: Full=Protein MAATS1;^Eukaryota; Metazoa; Chordata; Craniata; Vertebrata; Euteleostomi; Mammalia; Eutheria; Euarchontoglires; Glires; Rodentia; Sciurognathi; Muroidea; Muridae; Murinae; Mus; Mus	PF14738.5^PaaSYMP^Solute carrier (proton/amino acid symporter), TRAMD3 or PAT1^176-328^E:6.3e-67	GO:0005739^cellular_component^mitochondrion	.	No	No	No	No
c68532_g1_i1	78.666	-3.07751	0.69345	-4.43796	9.08e-06	0.00390252	CK001_MACFA^CK001_MACFA^Q:72-443,H:19-138^45.161%ID^E:1.28e-27^RecName: Full=UPF0686 protein C11orf1 homolog;^Eukaryota; Metazoa; Chordata; Craniata; Vertebrata; Euteleostomi; Mammalia; Eutheria; Euarchontoglires; Primates; Haplorrhini; Catarrhini; Cercopithecidae; Cercopithecinae; Macaca	PF06608.10^DUF1143^Protein of unknown function (DUF1143)^9-129^E:7.3e-37	GO:0005634^cellular_component^nucleus	GO:0005634^cellular_component^nucleus	No	No	No	No
c71349_g1_i1	7.45814	-3.95486	0.900455	-4.39206	1.12e-05	0.00466411	.	PF13833.5^EF-hand_8^EF-hand domain pair^38-84^E:8.5e-08	.	GO:0005509^molecular_function^calcium ion binding	No	No	No	No
c56737_g1_i1	23.4609	-3.17374	0.7288	-4.35474	1.33e-05	0.00474356	CCD96_MACFA^CCD96_MACFA^Q:340-1311,H:225-555^48.338%ID^E:2.94e-58^RecName: Full=Coiled-coil domain-containing protein 96;^Eukaryota; Metazoa; Chordata; Craniata; Vertebrata; Euteleostomi; Mammalia; Eutheria; Euarchontoglires; Primates; Haplorrhini; Catarrhini; Cercopithecidae; Cercopithecinae; Macaca	PF13870.5^DUF4201^Domain of unknown function (DUF4201)^253-427^E:1.5e-49	GO:0005737^cellular_component^cytoplasm`GO:0005815^cellular_component^microtubule organizing center	.	No	No	No	No
c65023_g1_i1	14.5805	-3.61794	0.828941	-4.36453	1.27e-05	0.00474356	EFHC1_MOUSE^EFHC1_MOUSE^Q:136-2037,H:6-642^53.894%ID^E:0^RecName: Full=EF-hand domain-containing protein 1;^Eukaryota; Metazoa; Chordata; Craniata; Vertebrata; Euteleostomi; Mammalia; Eutheria; Euarchontoglires; Glires; Rodentia; Sciurognathi; Muroidea; Muridae; Murinae; Mus; Mus	PF06565.11^DUF1126^DUF1126 PH-like domain^83-185^E:1.5e-30`PF06565.11^DUF1126^DUF1126 PH-like domain^229-348^E:1.4e-37`PF06565.11^DUF1126^DUF1126 PH-like domain^407-508^E:1.4e-33`PF13499.5^EF-hand_7^EF-hand domain pair^577-638^E:1.6e-07	GO:0005930^cellular_component^axoneme`GO:0005813^cellular_component^centrosome`GO:0005929^cellular_component^cilium`GO:0005737^cellular_component^cytoplasm`GO:0072686^cellular_component^mitotic spindle`GO:0043025^cellular_component^neuronal cell body`GO:0005509^molecular_function^calcium ion binding`GO:0008022^molecular_function^protein C-terminus binding`GO:0006874^biological_process^cellular ca…	GO:0005509^molecular_function^calcium ion binding	No	No	No	No
c70480_g2_i1	14.6162	-3.09106	0.707419	-4.36948	1.25e-05	0.00474356	.	.	.	.	No	No	No	No
c75605_g2_i1	24.7635	-3.15026	0.721932	-4.36365	1.28e-05	0.00474356	KAD9_HUMAN^KAD9_HUMAN^Q:110-2050,H:1258-1908^49.002%ID^E:0^RecName: Full=Adenylate kinase 9;^Eukaryota; Metazoa; Chordata; Craniata; Vertebrata; Euteleostomi; Mammalia; Eutheria; Euarchontoglires; Primates; Haplorrhini; Catarrhini; Hominidae; Homo`KAD9_HUMAN^KAD9_HUMAN^Q:368-643,H:331-415^38.043%ID^E:1.16e-08^RecName: Full=Adenylate kinase 9;^Eukaryota; Metazoa; Chordata; Craniata; Vertebrata; Eu…	PF00406.21^ADK^Adenylate kinase^195-354^E:1.8e-18`PF13207.5^AAA_17^AAA domain^196-317^E:2.9e-11	GO:0005737^cellular_component^cytoplasm`GO:0005829^cellular_component^cytosol`GO:0031965^cellular_component^nuclear membrane`GO:0005654^cellular_component^nucleoplasm`GO:0005634^cellular_component^nucleus`GO:0005524^molecular_function^ATP binding`GO:0004550^molecular_function^nucleoside diphosphate kinase activity`GO:0019206^molecular_function^nucleoside kinase activity`GO:0050145^molecular_funct…	.	No	No	No	No
c77145_g1_i3	76.1231	-2.66308	0.610733	-4.36047	1.3e-05	0.00474356	HYDIN_HUMAN^HYDIN_HUMAN^Q:7469-15397,H:2559-5121^43.433%ID^E:0^RecName: Full=Hydrocephalus-inducing protein homolog;^Eukaryota; Metazoa; Chordata; Craniata; Vertebrata; Euteleostomi; Mammalia; Eutheria; Euarchontoglires; Primates; Haplorrhini; Catarrhini; Hominidae; Homo`HYDIN_HUMAN^HYDIN_HUMAN^Q:2-2932,H:228-1210^45.749%ID^E:0^RecName: Full=Hydrocephalus-inducing protein homolog;^Eukaryota; Meta…	PF17213.2^Hydin_ADK^Hydin Adenylate kinase-like domain^1894-2136^E:1.1e-75	GO:1990718^cellular_component^axonemal central pair projection`GO:1904158^biological_process^axonemal central apparatus assembly`GO:0003341^biological_process^cilium movement`GO:0002064^biological_process^epithelial cell development`GO:0060438^biological_process^trachea development`GO:0021591^biological_process^ventricular system development	.	No	No	No	No
c55846_g1_i1	22.2508	-3.00615	0.696228	-4.31778	1.58e-05	0.00496754	LRGUK_MOUSE^LRGUK_MOUSE^Q:226-2025,H:104-699^44.805%ID^E:6.39e-169^RecName: Full=Leucine-rich repeat and guanylate kinase domain-containing protein;^Eukaryota; Metazoa; Chordata; Craniata; Vertebrata; Euteleostomi; Mammalia; Eutheria; Euarchontoglires; Glires; Rodentia; Sciurognathi; Muroidea; Muridae; Murinae; Mus; Mus	PF14580.5^LRR_9^Leucine-rich repeat^233-349^E:4.7e-13`PF00625.20^Guanylate_kin^Guanylate kinase^389-569^E:8e-39	GO:0001669^cellular_component^acrosomal vesicle`GO:0002177^cellular_component^manchette`GO:0005524^molecular_function^ATP binding`GO:0016301^molecular_function^kinase activity`GO:0035082^biological_process^axoneme assembly`GO:0030154^biological_process^cell differentiation`GO:0007283^biological_process^spermatogenesis	.	No	No	No	No
c62213_g1_i1	38.1319	-2.18942	0.506103	-4.32603	1.52e-05	0.00496754	CCD40_HUMAN^CCD40_HUMAN^Q:780-3341,H:276-1129^42.74%ID^E:0^RecName: Full=Coiled-coil domain-containing protein 40 {ECO:0000305};^Eukaryota; Metazoa; Chordata; Craniata; Vertebrata; Euteleostomi; Mammalia; Eutheria; Euarchontoglires; Primates; Haplorrhini; Catarrhini; Hominidae; Homo	PF08647.10^BRE1^BRE1 E3 ubiquitin ligase^764-862^E:6.9e-20	GO:0005930^cellular_component^axoneme`GO:0005929^cellular_component^cilium`GO:0005737^cellular_component^cytoplasm`GO:0070286^biological_process^axonemal dynein complex assembly`GO:0003341^biological_process^cilium movement`GO:0071907^biological_process^determination of digestive tract left/right asymmetry`GO:0071910^biological_process^determination of liver left/right asymmetry`GO:0035469^biolog…	.	No	No	No	No
c65961_g1_i1	71.4295	-3.12499	0.723045	-4.32198	1.55e-05	0.00496754	TEKT3_BOVIN^TEKT3_BOVIN^Q:438-1622,H:87-481^51.392%ID^E:6.77e-124^RecName: Full=Tektin-3;^Eukaryota; Metazoa; Chordata; Craniata; Vertebrata; Euteleostomi; Mammalia; Eutheria; Laurasiatheria; Cetartiodactyla; Ruminantia; Pecora; Bovidae; Bovinae; Bos	PF03148.13^Tektin^Tektin family^72-454^E:1.8e-143	GO:0002080^cellular_component^acrosomal membrane`GO:0005874^cellular_component^microtubule`GO:0005634^cellular_component^nucleus`GO:0036126^cellular_component^sperm flagellum`GO:0060271^biological_process^cilium assembly`GO:0060294^biological_process^cilium movement involved in cell motility`GO:0030317^biological_process^flagellated sperm motility`GO:0080154^biological_process^regulation of ferti…	.	No	No	No	No
c66644_g1_i1	71.4442	-2.92202	0.677143	-4.31522	1.59e-05	0.00496754	FA47E_HUMAN^FA47E_HUMAN^Q:844-1242,H:228-359^32.331%ID^E:7.31e-13^RecName: Full=Protein FAM47E;^Eukaryota; Metazoa; Chordata; Craniata; Vertebrata; Euteleostomi; Mammalia; Eutheria; Euarchontoglires; Primates; Haplorrhini; Catarrhini; Hominidae; Homo`FA47E_HUMAN^FA47E_HUMAN^Q:46-531,H:1-152^32.099%ID^E:3.17e-12^RecName: Full=Protein FAM47E;^Eukaryota; Metazoa; Chordata; Craniata; Vertebrata; Eute…	PF14642.5^FAM47^FAM47 family^21-186^E:1.4e-10	.	.	No	No	No	No
c71772_g1_i2	9.73857	-2.42694	0.561802	-4.31992	1.56e-05	0.00496754	WDR78_RAT^WDR78_RAT^Q:285-2450,H:67-783^44.401%ID^E:0^RecName: Full=WD repeat-containing protein 78;^Eukaryota; Metazoa; Chordata; Craniata; Vertebrata; Euteleostomi; Mammalia; Eutheria; Euarchontoglires; Glires; Rodentia; Sciurognathi; Muroidea; Muridae; Murinae; Rattus	PF00400.31^WD40^WD domain, G-beta repeat^661-698^E:0.0016	GO:0002244^biological_process^hematopoietic progenitor cell differentiation	GO:0005515^molecular_function^protein binding	No	No	No	No
c55136_g2_i1	17.0385	-3.45983	0.807958	-4.28219	1.85e-05	0.00562499	CD047_XENLA^CD047_XENLA^Q:279-1196,H:4-303^52.443%ID^E:6.5e-96^RecName: Full=UPF0602 protein C4orf47 homolog;^Eukaryota; Metazoa; Chordata; Craniata; Vertebrata; Euteleostomi; Amphibia; Batrachia; Anura; Pipoidea; Pipidae; Xenopodinae; Xenopus; Xenopus	PF15239.5^DUF4586^Domain of unknown function (DUF4586)^8-298^E:6.7e-102	GO:0005813^cellular_component^centrosome`GO:0005737^cellular_component^cytoplasm	.	No	No	No	No
c63532_g2_i1	91.7366	-1.80518	0.423681	-4.26072	2.04e-05	0.00604623	.	.	.	.	No	No	No	No
c61480_g1_i1	33.5062	-2.22811	0.52377	-4.25398	2.1e-05	0.00608625	IQCG_HUMAN^IQCG_HUMAN^Q:59-1195,H:46-416^40%ID^E:2.7e-89^RecName: Full=IQ domain-containing protein G;^Eukaryota; Metazoa; Chordata; Craniata; Vertebrata; Euteleostomi; Mammalia; Eutheria; Euarchontoglires; Primates; Haplorrhini; Catarrhini; Hominidae; Homo	PF00612.26^IQ^IQ calmodulin-binding motif^345-363^E:0.00012	GO:0005737^cellular_component^cytoplasm`GO:0070062^cellular_component^extracellular exosome`GO:0002177^cellular_component^manchette`GO:0031514^cellular_component^motile cilium`GO:0036126^cellular_component^sperm flagellum`GO:0005516^molecular_function^calmodulin binding`GO:0030544^molecular_function^Hsp70 protein binding`GO:0007288^biological_process^sperm axoneme assembly`GO:0007286^biological_p…	GO:0005515^molecular_function^protein binding	No	No	No	No
c62214_g1_i1	56.7591	-2.65336	0.626219	-4.23711	2.26e-05	0.00641263	CFA58_MOUSE^CFA58_MOUSE^Q:675-2690,H:197-865^69.048%ID^E:0^RecName: Full=Cilia- and flagella-associated protein 58 {ECO:0000305};^Eukaryota; Metazoa; Chordata; Craniata; Vertebrata; Euteleostomi; Mammalia; Eutheria; Euarchontoglires; Glires; Rodentia; Sciurognathi; Muroidea; Muridae; Murinae; Mus; Mus`CFA58_MOUSE^CFA58_MOUSE^Q:83-637,H:1-184^65.405%ID^E:0^RecName: Full=Cilia- and flagella-associa…	.	GO:0005929^cellular_component^cilium`GO:0005615^cellular_component^extracellular space	.	No	No	No	No
c69032_g1_i1	31.3313	-2.48701	0.58847	-4.22623	2.38e-05	0.00658115	QRIC2_HUMAN^QRIC2_HUMAN^Q:1938-2993,H:1247-1615^39.418%ID^E:1.49e-68^RecName: Full=Glutamine-rich protein 2;^Eukaryota; Metazoa; Chordata; Craniata; Vertebrata; Euteleostomi; Mammalia; Eutheria; Euarchontoglires; Primates; Haplorrhini; Catarrhini; Hominidae; Homo	PF11918.7^Peptidase_S41_N^N-terminal domain of Peptidase_S41 in eukaryotic IRBP^284-337^E:0.46`PF16043.4^DUF4795^Domain of unknown function (DUF4795)^616-819^E:1.3e-62`PF11918.7^Peptidase_S41_N^N-terminal domain of Peptidase_S41 in eukaryotic IRBP^616-676^E:2.8	.	.	No	No	No	No
c64846_g1_i1	83.1107	-2.42218	0.574204	-4.21832	2.46e-05	0.00666798	R10B2_HUMAN^R10B2_HUMAN^Q:203-2023,H:73-682^45.663%ID^E:0^RecName: Full=Radial spoke head 10 homolog B2;^Eukaryota; Metazoa; Chordata; Craniata; Vertebrata; Euteleostomi; Mammalia; Eutheria; Euarchontoglires; Primates; Haplorrhini; Catarrhini; Hominidae; Homo	PF02493.19^MORN^MORN repeat^81-102^E:8.7`PF02493.19^MORN^MORN repeat^104-124^E:0.0093`PF02493.19^MORN^MORN repeat^127-149^E:9.6e-05`PF02493.19^MORN^MORN repeat^150-170^E:4.3e-05`PF02493.19^MORN^MORN repeat^174-192^E:0.00013`PF02493.19^MORN^MORN repeat^199-221^E:7.5e-06`PF02493.19^MORN^MORN repeat^222-239^E:0.00075`PF02493.19^MORN^MORN repeat^246-263^E:0.51`PF02493.19^MORN^MORN repeat^279-301^E:1.…	.	.	No	No	No	No
c69562_g4_i1	47.978	-0.861229	0.204632	-4.20867	2.57e-05	0.00681101	.	.	.	.	No	No	No	No
c63943_g1_i2	25.7204	-3.42902	0.821754	-4.1728	3.01e-05	0.00781146	STPG3_MOUSE^STPG3_MOUSE^Q:707-1288,H:94-306^31.39%ID^E:8.41e-20^RecName: Full=Protein STPG3;^Eukaryota; Metazoa; Chordata; Craniata; Vertebrata; Euteleostomi; Mammalia; Eutheria; Euarchontoglires; Glires; Rodentia; Sciurognathi; Muroidea; Muridae; Murinae; Mus; Mus	PF07004.11^SHIPPO-rpt^Sperm-tail PG-rich repeat^236-264^E:5.2e-05`PF07004.11^SHIPPO-rpt^Sperm-tail PG-rich repeat^381-404^E:0.27	.	.	No	No	No	No
c72594_g1_i6	20.4582	-3.39547	0.815164	-4.16539	3.11e-05	0.00790514	SP17_RABIT^SP17_RABIT^Q:99-521,H:1-140^43.972%ID^E:1.53e-30^RecName: Full=Sperm surface protein Sp17;^Eukaryota; Metazoa; Chordata; Craniata; Vertebrata; Euteleostomi; Mammalia; Eutheria; Euarchontoglires; Glires; Lagomorpha; Leporidae; Oryctolagus	PF02197.16^RIIa^Regulatory subunit of type II PKA R-subunit^46-82^E:9.7e-11`PF00612.26^IQ^IQ calmodulin-binding motif^145-161^E:0.0016`PF00612.26^IQ^IQ calmodulin-binding motif^194-213^E:1.8e-05`PF00612.26^IQ^IQ calmodulin-binding motif^237-256^E:0.0012`PF00612.26^IQ^IQ calmodulin-binding motif^281-300^E:3.9e-05`PF00612.26^IQ^IQ calmodulin-binding motif^341-360^E:1.7e-05`PF00612.26^IQ^IQ calmodul…	GO:0005737^cellular_component^cytoplasm`GO:0009897^cellular_component^external side of plasma membrane`GO:0035686^cellular_component^sperm fibrous sheath`GO:0097228^cellular_component^sperm principal piece`GO:0008201^molecular_function^heparin binding`GO:0007339^biological_process^binding of sperm to zona pellucida	GO:0005515^molecular_function^protein binding	No	No	No	No
c66863_g1_i1	21.431	-2.83839	0.684598	-4.14607	3.38e-05	0.00813669	SPAT4_PANTR^SPAT4_PANTR^Q:26-817,H:49-293^38.491%ID^E:2.51e-52^RecName: Full=Spermatogenesis-associated protein 4;^Eukaryota; Metazoa; Chordata; Craniata; Vertebrata; Euteleostomi; Mammalia; Eutheria; Euarchontoglires; Primates; Haplorrhini; Catarrhini; Hominidae; Pan	PF06294.10^CH_2^CH-like domain in sperm protein^15-110^E:1.6e-31`PF11971.7^CAMSAP_CH^CAMSAP CH domain^17-96^E:2.8e-13	GO:0005737^cellular_component^cytoplasm	.	No	No	No	No
c67814_g5_i1	59.7962	-2.1871	0.527948	-4.14264	3.43e-05	0.00813669	ANR45_MOUSE^ANR45_MOUSE^Q:184-783,H:43-242^43%ID^E:1.35e-47^RecName: Full=Ankyrin repeat domain-containing protein 45;^Eukaryota; Metazoa; Chordata; Craniata; Vertebrata; Euteleostomi; Mammalia; Eutheria; Euarchontoglires; Glires; Rodentia; Sciurognathi; Muroidea; Muridae; Murinae; Mus; Mus	PF12796.6^Ank_2^Ankyrin repeats (3 copies)^53-130^E:4.9e-10`PF13606.5^Ank_3^Ankyrin repeat^66-94^E:0.00028`PF00023.29^Ank^Ankyrin repeat^66-97^E:0.00052`PF13637.5^Ank_4^Ankyrin repeats (many copies)^69-120^E:2.1e-09	.	GO:0005515^molecular_function^protein binding	No	No	No	No
c70058_g3_i2	70.1095	-2.24607	0.54242	-4.14083	3.46e-05	0.00813669	RSPH1_MOUSE^RSPH1_MOUSE^Q:130-747,H:17-222^66.505%ID^E:1.51e-79^RecName: Full=Radial spoke head 1 homolog;^Eukaryota; Metazoa; Chordata; Craniata; Vertebrata; Euteleostomi; Mammalia; Eutheria; Euarchontoglires; Glires; Rodentia; Sciurognathi; Muroidea; Muridae; Murinae; Mus; Mus	PF02493.19^MORN^MORN repeat^54-70^E:0.13`PF02493.19^MORN^MORN repeat^71-93^E:1.6e-05`PF02493.19^MORN^MORN repeat^94-115^E:8.5e-07`PF02493.19^MORN^MORN repeat^117-138^E:6.6e-07`PF02493.19^MORN^MORN repeat^140-158^E:2.3e-07`PF02493.19^MORN^MORN repeat^164-183^E:0.00049`PF02493.19^MORN^MORN repeat^186-207^E:0.00075	GO:0000794^cellular_component^condensed nuclear chromosome`GO:0005737^cellular_component^cytoplasm`GO:0005829^cellular_component^cytosol`GO:0072687^cellular_component^meiotic spindle`GO:0031514^cellular_component^motile cilium`GO:0005634^cellular_component^nucleus`GO:0001520^cellular_component^outer dense fiber`GO:0036126^cellular_component^sperm flagellum`GO:0035082^biological_process^axoneme as…	.	No	No	No	No
c73553_g1_i1	45.6329	-3.29805	0.794816	-4.14944	3.33e-05	0.00813669	NSUN7_MOUSE^NSUN7_MOUSE^Q:816-2162,H:88-537^40.088%ID^E:2.84e-96^RecName: Full=Putative methyltransferase NSUN7;^Eukaryota; Metazoa; Chordata; Craniata; Vertebrata; Euteleostomi; Mammalia; Eutheria; Euarchontoglires; Glires; Rodentia; Sciurognathi; Muroidea; Muridae; Murinae; Mus; Mus	PF01189.16^Methyltr_RsmB-F^16S rRNA methyltransferase RsmB/F^353-521^E:5.5e-08	GO:0008168^molecular_function^methyltransferase activity`GO:0003723^molecular_function^RNA binding`GO:0030317^biological_process^flagellated sperm motility`GO:0030382^biological_process^sperm mitochondrion organization	GO:0008168^molecular_function^methyltransferase activity	No	No	No	No
c53375_g1_i1	11.4006	-4.02681	0.977691	-4.11869	3.81e-05	0.00879323	.	.	.	.	No	No	No	No
c59910_g1_i1	25.5942	-1.6004	0.389657	-4.10719	4e-05	0.00907446	CATR_SCHDU^CATR_SCHDU^Q:156-599,H:21-168^87.162%ID^E:1.96e-81^RecName: Full=Caltractin;^Eukaryota; Viridiplantae; Chlorophyta; Chlorodendrophyceae; Chlorodendrales; Chlorodendraceae; Scherffelia	PF13833.5^EF-hand_8^EF-hand domain pair^57-84^E:7.7e-05`PF13499.5^EF-hand_7^EF-hand domain pair^58-120^E:2.2e-15`PF00036.31^EF-hand_1^EF hand^59-87^E:3.2e-09`PF13405.5^EF-hand_6^EF-hand domain^59-88^E:1.2e-09`PF13202.5^EF-hand_5^EF hand^60-81^E:2.6e-06`PF13833.5^EF-hand_8^EF-hand domain pair^73-120^E:3.7e-07`PF00036.31^EF-hand_1^EF hand^95-121^E:1.3e-06`PF13499.5^EF-hand_7^EF-hand domain pair^130…	GO:0005814^cellular_component^centriole`GO:0005813^cellular_component^centrosome`GO:0036064^cellular_component^ciliary basal body`GO:0005929^cellular_component^cilium`GO:0005622^cellular_component^intracellular`GO:0032391^cellular_component^photoreceptor connecting cilium`GO:0071942^cellular_component^XPC complex`GO:0005509^molecular_function^calcium ion binding`GO:0031683^molecular_function^G-pr…	GO:0005509^molecular_function^calcium ion binding	No	No	No	No
c65710_g3_i2	19.2627	-1.92368	0.46964	-4.09607	4.2e-05	0.0091944	.	.	.	.	No	No	No	No
c74925_g1_i1	41.2344	-1.15238	0.28135	-4.09589	4.21e-05	0.0091944	TTC6_HUMAN^TTC6_HUMAN^Q:5300-6520,H:111-514^47.42%ID^E:3.7e-115^RecName: Full=Tetratricopeptide repeat protein 6;^Eukaryota; Metazoa; Chordata; Craniata; Vertebrata; Euteleostomi; Mammalia; Eutheria; Euarchontoglires; Primates; Haplorrhini; Catarrhini; Hominidae; Homo`TTC6_HUMAN^TTC6_HUMAN^Q:3818-5281,H:74-514^24.453%ID^E:4.91e-18^RecName: Full=Tetratricopeptide repeat protein 6;^Eukaryota; Metaz…	PF13181.5^TPR_8^Tetratricopeptide repeat^1262-1290^E:0.0073`PF13414.5^TPR_11^TPR repeat^1266-1305^E:1.5e-09`PF13431.5^TPR_17^Tetratricopeptide repeat^1280-1306^E:0.00015`PF13432.5^TPR_16^Tetratricopeptide repeat^1329-1374^E:7.6e-06`PF13181.5^TPR_8^Tetratricopeptide repeat^1430-1460^E:0.091`PF13432.5^TPR_16^Tetratricopeptide repeat^1512-1551^E:0.0065`PF07719.16^TPR_2^Tetratricopeptide repeat^1648-…	.	GO:0005515^molecular_function^protein binding	No	No	No	No
c59669_g1_i1	25.433	-2.88173	0.705506	-4.08463	4.41e-05	0.00932496	RSPH3_BOVIN^RSPH3_BOVIN^Q:199-1197,H:201-530^65.868%ID^E:2.74e-103^RecName: Full=Radial spoke head protein 3 homolog;^Eukaryota; Metazoa; Chordata; Craniata; Vertebrata; Euteleostomi; Mammalia; Eutheria; Laurasiatheria; Cetartiodactyla; Ruminantia; Pecora; Bovidae; Bovinae; Bos	PF06098.10^Radial_spoke_3^Radial spoke protein 3^42-323^E:1.3e-132	.	.	No	No	No	No
c61489_g1_i2	12.2284	3.70702	0.907291	4.08582	4.39e-05	0.00932496	.	.	.	.	No	No	No	No
c65520_g1_i1	39.0235	-2.63811	0.647575	-4.07383	4.62e-05	0.00944783	ZMY12_HUMAN^ZMY12_HUMAN^Q:91-1161,H:6-360^50.552%ID^E:1.16e-120^RecName: Full=Zinc finger MYND domain-containing protein 12;^Eukaryota; Metazoa; Chordata; Craniata; Vertebrata; Euteleostomi; Mammalia; Eutheria; Euarchontoglires; Primates; Haplorrhini; Catarrhini; Hominidae; Homo	PF01753.17^zf-MYND^MYND finger^16-53^E:9.6e-09`PF13181.5^TPR_8^Tetratricopeptide repeat^130-155^E:0.095`PF07721.13^TPR_4^Tetratricopeptide repeat^175-195^E:0.35	GO:0005622^cellular_component^intracellular`GO:0046872^molecular_function^metal ion binding	GO:0005515^molecular_function^protein binding`GO:0042802^molecular_function^identical protein binding	No	No	No	No
c66471_g2_i1	24.0662	-3.16157	0.775806	-4.07521	4.6e-05	0.00944783	CFA53_DANRE^CFA53_DANRE^Q:138-1643,H:1-504^40.198%ID^E:6.24e-43^RecName: Full=Cilia- and flagella-associated protein 53 {ECO:0000305};^Eukaryota; Metazoa; Chordata; Craniata; Vertebrata; Euteleostomi; Actinopterygii; Neopterygii; Teleostei; Ostariophysi; Cypriniformes; Cyprinidae; Danio	PF13868.5^TPH^Trichohyalin-plectin-homology domain^158-490^E:5.4e-24	GO:0005930^cellular_component^axoneme`GO:0097546^cellular_component^ciliary base`GO:0060271^biological_process^cilium assembly`GO:0003341^biological_process^cilium movement`GO:0060287^biological_process^epithelial cilium movement involved in determination of left/right asymmetry	.	No	No	No	No
c75040_g1_i3	14.5645	-1.14212	0.281156	-4.06223	4.86e-05	0.00976967	PCY2_HUMAN^PCY2_HUMAN^Q:33-1127,H:8-375^64.946%ID^E:8.67e-173^RecName: Full=Ethanolamine-phosphate cytidylyltransferase;^Eukaryota; Metazoa; Chordata; Craniata; Vertebrata; Euteleostomi; Mammalia; Eutheria; Euarchontoglires; Primates; Haplorrhini; Catarrhini; Hominidae; Homo`PCY2_HUMAN^PCY2_HUMAN^Q:60-566,H:208-381^29.31%ID^E:1.28e-16^RecName: Full=Ethanolamine-phosphate cytidylyltransferase;^Euk…	PF01467.25^CTP_transf_like^Cytidylyltransferase-like^30-153^E:1.4e-30`PF01467.25^CTP_transf_like^Cytidylyltransferase-like^219-312^E:4.3e-14	GO:0005789^cellular_component^endoplasmic reticulum membrane`GO:0004306^molecular_function^ethanolamine-phosphate cytidylyltransferase activity`GO:0006646^biological_process^phosphatidylethanolamine biosynthetic process`GO:0008654^biological_process^phospholipid biosynthetic process	GO:0003824^molecular_function^catalytic activity`GO:0009058^biological_process^biosynthetic process	No	No	No	No
c72686_g1_i1	133.904	-2.30772	0.569362	-4.05318	5.05e-05	0.00999469	TTLL3_HUMAN^TTLL3_HUMAN^Q:767-1870,H:176-549^51.733%ID^E:5.35e-119^RecName: Full=Tubulin monoglycylase TTLL3;^Eukaryota; Metazoa; Chordata; Craniata; Vertebrata; Euteleostomi; Mammalia; Eutheria; Euarchontoglires; Primates; Haplorrhini; Catarrhini; Hominidae; Homo`TTLL3_HUMAN^TTLL3_HUMAN^Q:197-373,H:100-158^49.153%ID^E:3.22e-12^RecName: Full=Tubulin monoglycylase TTLL3;^Eukaryota; Metazoa; Chorda…	PF03133.14^TTL^Tubulin-tyrosine ligase family^276-574^E:3.4e-76	GO:0005930^cellular_component^axoneme`GO:0005929^cellular_component^cilium`GO:0005737^cellular_component^cytoplasm`GO:0005874^cellular_component^microtubule`GO:0015630^cellular_component^microtubule cytoskeleton`GO:0005524^molecular_function^ATP binding`GO:0070735^molecular_function^protein-glycine ligase activity`GO:0070736^molecular_function^protein-glycine ligase activity, initiating`GO:003508…	GO:0006464^biological_process^cellular protein modification process	No	No	No	No
c54144_g1_i1	19.4903	-2.12025	0.52703	-4.02301	5.75e-05	0.01008	SMKR1_HUMAN^SMKR1_HUMAN^Q:347-460,H:19-56^60.526%ID^E:7.06e-07^RecName: Full=Small lysine-rich protein 1;^Eukaryota; Metazoa; Chordata; Craniata; Vertebrata; Euteleostomi; Mammalia; Eutheria; Euarchontoglires; Primates; Haplorrhini; Catarrhini; Hominidae; Homo	.	.	.	No	No	No	No
c57783_g1_i1	501.325	-4.90859	1.21926	-4.02588	5.68e-05	0.01008	.	.	.	.	No	No	No	No
c57797_g1_i1	21.0999	-3.08695	0.76477	-4.03644	5.43e-05	0.01008	CB081_RAT^CB081_RAT^Q:138-596,H:13-161^42.484%ID^E:3.76e-29^RecName: Full=Uncharacterized protein C2orf81 homolog;^Eukaryota; Metazoa; Chordata; Craniata; Vertebrata; Euteleostomi; Mammalia; Eutheria; Euarchontoglires; Glires; Rodentia; Sciurognathi; Muroidea; Muridae; Murinae; Rattus	PF15479.5^DUF4639^Domain of unknown function (DUF4639)^6-194^E:6.6e-39	.	.	No	No	No	No
c65786_g1_i1	10.093	-2.79366	0.694601	-4.02196	5.77e-05	0.01008	CFA69_CALJA^CFA69_CALJA^Q:235-2949,H:29-938^47.717%ID^E:0^RecName: Full=Cilia- and flagella-associated protein 69 {ECO:0000250|UniProtKB:A5D8W1};^Eukaryota; Metazoa; Chordata; Craniata; Vertebrata; Euteleostomi; Mammalia; Eutheria; Euarchontoglires; Primates; Haplorrhini; Platyrrhini; Cebidae; Callitrichinae; Callithrix	.	.	.	No	No	No	No
c65987_g1_i1	13.9258	-3.25055	0.805449	-4.03569	5.44e-05	0.01008	CG062_HUMAN^CG062_HUMAN^Q:63-734,H:27-253^34.783%ID^E:2.86e-36^RecName: Full=Uncharacterized protein C7orf62;^Eukaryota; Metazoa; Chordata; Craniata; Vertebrata; Euteleostomi; Mammalia; Eutheria; Euarchontoglires; Primates; Haplorrhini; Catarrhini; Hominidae; Homo	.	.	.	No	No	No	No
c71079_g1_i2	15.6647	-3.55836	0.8852	-4.01984	5.82e-05	0.01008	LMTD1_MACFA^LMTD1_MACFA^Q:2817-3620,H:110-383^35.714%ID^E:3.9e-44^RecName: Full=Lamin tail domain-containing protein 1;^Eukaryota; Metazoa; Chordata; Craniata; Vertebrata; Euteleostomi; Mammalia; Eutheria; Euarchontoglires; Primates; Haplorrhini; Catarrhini; Cercopithecidae; Cercopithecinae; Macaca	PF00038.20^Filament^Intermediate filament protein^73-435^E:1.3e-28`PF00932.18^LTD^Lamin Tail Domain^710-819^E:2.4e-14	GO:0005882^cellular_component^intermediate filament`GO:0005198^molecular_function^structural molecule activity	GO:0005198^molecular_function^structural molecule activity`GO:0005882^cellular_component^intermediate filament	No	No	No	No
c75192_g1_i6	83.0919	-2.24091	0.554661	-4.04014	5.34e-05	0.01008	TXND3_CIOIN^TXND3_CIOIN^Q:210-1856,H:28-590^52.028%ID^E:0^RecName: Full=Thioredoxin domain-containing protein 3 homolog;^Eukaryota; Metazoa; Chordata; Tunicata; Ascidiacea; Enterogona; Phlebobranchia; Cionidae; Ciona`TXND3_CIOIN^TXND3_CIOIN^Q:612-1022,H:462-592^31.387%ID^E:3.84e-14^RecName: Full=Thioredoxin domain-containing protein 3 homolog;^Eukaryota; Metazoa; Chordata; Tunicata; Ascidiacea; E…	PF00085.19^Thioredoxin^Thioredoxin^16-110^E:7.9e-10`PF00334.18^NDK^Nucleoside diphosphate kinase^162-299^E:1.6e-36`PF00334.18^NDK^Nucleoside diphosphate kinase^312-446^E:1.1e-38`PF00334.18^NDK^Nucleoside diphosphate kinase^447-580^E:4.4e-41	GO:0005623^cellular_component^cell`GO:0004550^molecular_function^nucleoside diphosphate kinase activity`GO:0030154^biological_process^cell differentiation`GO:0045454^biological_process^cell redox homeostasis`GO:0006241^biological_process^CTP biosynthetic process`GO:0006183^biological_process^GTP biosynthetic process`GO:0007275^biological_process^multicellular organism development`GO:0007283^biolo…	GO:0045454^biological_process^cell redox homeostasis`GO:0004550^molecular_function^nucleoside diphosphate kinase activity`GO:0006165^biological_process^nucleoside diphosphate phosphorylation`GO:0006183^biological_process^GTP biosynthetic process`GO:0006228^biological_process^UTP biosynthetic process`GO:0006241^biological_process^CTP biosynthetic process	No	No	No	No
c76512_g1_i1	20.5614	-2.20858	0.545962	-4.0453	5.23e-05	0.01008	PCDP1_HUMAN^PCDP1_HUMAN^Q:192-2621,H:32-809^39.586%ID^E:9.06e-179^RecName: Full=Cilia- and flagella-associated protein 221 {ECO:0000312|HGNC:HGNC:33720};^Eukaryota; Metazoa; Chordata; Craniata; Vertebrata; Euteleostomi; Mammalia; Eutheria; Euarchontoglires; Primates; Haplorrhini; Catarrhini; Hominidae; Homo	PF14874.5^PapD-like^Flagellar-associated PapD-like^59-124^E:8.9e-07	GO:0005930^cellular_component^axoneme`GO:0005929^cellular_component^cilium`GO:0005737^cellular_component^cytoplasm`GO:0005516^molecular_function^calmodulin binding`GO:0060271^biological_process^cilium assembly`GO:0003341^biological_process^cilium movement`GO:0044458^biological_process^motile cilium assembly	.	No	No	No	No
c76784_g1_i1	28.7816	-2.66985	0.662086	-4.03249	5.52e-05	0.01008	CFA44_HUMAN^CFA44_HUMAN^Q:848-3436,H:109-977^49.543%ID^E:0^RecName: Full=Cilia- and flagella-associated protein 44 {ECO:0000312|HGNC:HGNC:25631};^Eukaryota; Metazoa; Chordata; Craniata; Vertebrata; Euteleostomi; Mammalia; Eutheria; Euarchontoglires; Primates; Haplorrhini; Catarrhini; Hominidae; Homo	PF00400.31^WD40^WD domain, G-beta repeat^633-665^E:0.014	GO:0042995^cellular_component^cell projection`GO:0060285^biological_process^cilium-dependent cell motility	GO:0005515^molecular_function^protein binding	No	No	No	No
c52187_g1_i1	54.2675	-4.99781	1.25336	-3.98754	6.68e-05	0.0106708	WDY_DROGR^WDY_DROGR^Q:305-3271,H:43-922^26.01%ID^E:4.02e-88^RecName: Full=WD repeat-containing protein on Y chromosome {ECO:0000303|PubMed:19011613, ECO:0000312|EMBL:DAA06440.1};^Eukaryota; Metazoa; Ecdysozoa; Arthropoda; Hexapoda; Insecta; Pterygota; Neoptera; Endopterygota; Diptera; Brachycera; Muscomorpha; Ephydroidea; Drosophilidae; Drosophila; Hawaiian Drosophila	PF13499.5^EF-hand_7^EF-hand domain pair^81-142^E:1.2e-08`PF13833.5^EF-hand_8^EF-hand domain pair^97-141^E:3.1e-10`PF13202.5^EF-hand_5^EF hand^122-139^E:0.011`PF00400.31^WD40^WD domain, G-beta repeat^406-429^E:0.13`PF00400.31^WD40^WD domain, G-beta repeat^974-1008^E:0.035	GO:0031146^biological_process^SCF-dependent proteasomal ubiquitin-dependent protein catabolic process	GO:0005509^molecular_function^calcium ion binding`GO:0005515^molecular_function^protein binding	No	No	No	No
c61203_g1_i1	37.0279	-2.78983	0.699078	-3.99072	6.59e-05	0.0106708	ENKUR_HUMAN^ENKUR_HUMAN^Q:193-936,H:9-254^50.806%ID^E:4.17e-73^RecName: Full=Enkurin;^Eukaryota; Metazoa; Chordata; Craniata; Vertebrata; Euteleostomi; Mammalia; Eutheria; Euarchontoglires; Primates; Haplorrhini; Catarrhini; Hominidae; Homo	PF13864.5^Enkurin^Calmodulin-binding^153-249^E:9.1e-30	GO:0001669^cellular_component^acrosomal vesicle`GO:0097228^cellular_component^sperm principal piece	.	No	No	No	No
c67998_g2_i1	60.0373	-2.65737	0.667713	-3.97981	6.9e-05	0.0106708	.	.	.	.	No	No	No	No
c71079_g2_i1	74.0286	-2.47994	0.621547	-3.98994	6.61e-05	0.0106708	.	.	.	.	No	No	No	No
c72867_g1_i2	13.8975	-3.23427	0.812148	-3.98236	6.82e-05	0.0106708	CFA43_HUMAN^CFA43_HUMAN^Q:119-5197,H:17-1665^35.308%ID^E:0^RecName: Full=Cilia- and flagella-associated protein 43 {ECO:0000312|HGNC:HGNC:26684};^Eukaryota; Metazoa; Chordata; Craniata; Vertebrata; Euteleostomi; Mammalia; Eutheria; Euarchontoglires; Primates; Haplorrhini; Catarrhini; Hominidae; Homo	PF00400.31^WD40^WD domain, G-beta repeat^488-513^E:0.011	GO:0042995^cellular_component^cell projection	GO:0005515^molecular_function^protein binding	No	No	No	No
c74773_g3_i7	16.7841	-1.67964	0.420277	-3.99652	6.43e-05	0.0106708	SON_MOUSE^SON_MOUSE^Q:1352-1615,H:2227-2313^44.944%ID^E:4.35e-13^RecName: Full=Protein SON;^Eukaryota; Metazoa; Chordata; Craniata; Vertebrata; Euteleostomi; Mammalia; Eutheria; Euarchontoglires; Glires; Rodentia; Sciurognathi; Muroidea; Muridae; Murinae; Mus; Mus`SON_MOUSE^SON_MOUSE^Q:872-1183,H:2114-2218^39.286%ID^E:1.36e-08^RecName: Full=Protein SON;^Eukaryota; Metazoa; Chordata; Craniata; Ver…	.	GO:0016607^cellular_component^nuclear speck`GO:0003677^molecular_function^DNA binding`GO:0003676^molecular_function^nucleic acid binding`GO:0003723^molecular_function^RNA binding`GO:0000226^biological_process^microtubule cytoskeleton organization`GO:0000281^biological_process^mitotic cytokinesis`GO:0006397^biological_process^mRNA processing`GO:0043066^biological_process^negative regulation of apo…	.	No	No	No	No
c76071_g1_i1	23.6856	-2.69098	0.673417	-3.99602	6.44e-05	0.0106708	CC105_BOVIN^CC105_BOVIN^Q:420-1496,H:110-467^30.495%ID^E:3.77e-36^RecName: Full=Coiled-coil domain-containing protein 105;^Eukaryota; Metazoa; Chordata; Craniata; Vertebrata; Euteleostomi; Mammalia; Eutheria; Laurasiatheria; Cetartiodactyla; Ruminantia; Pecora; Bovidae; Bovinae; Bos	PF03148.13^Tektin^Tektin family^15-402^E:9.5e-39	GO:0070062^cellular_component^extracellular exosome	.	No	No	No	No
c77147_g1_i3	17.8379	-2.45794	0.617808	-3.97848	6.94e-05	0.0106708	DYH3_HUMAN^DYH3_HUMAN^Q:2-8029,H:1451-4116^68.559%ID^E:0^RecName: Full=Dynein heavy chain 3, axonemal;^Eukaryota; Metazoa; Chordata; Craniata; Vertebrata; Euteleostomi; Mammalia; Eutheria; Euarchontoglires; Primates; Haplorrhini; Catarrhini; Hominidae; Homo	PF12774.6^AAA_6^Hydrolytic ATP binding site of dynein motor region D1^2-171^E:5.7e-67`PF07728.13^AAA_5^AAA domain (dynein-related subfamily)^255-400^E:1.3e-06`PF12775.6^AAA_7^P-loop containing dynein motor region D3^597-864^E:6.6e-51`PF07728.13^AAA_5^AAA domain (dynein-related subfamily)^628-763^E:8e-06`PF12780.6^AAA_8^P-loop containing dynein motor region D4^959-1222^E:8.1e-65`PF12777.6^MT^Micro…	GO:0005858^cellular_component^axonemal dynein complex`GO:0005737^cellular_component^cytoplasm`GO:0005874^cellular_component^microtubule`GO:0005524^molecular_function^ATP binding`GO:0003777^molecular_function^microtubule motor activity`GO:0060285^biological_process^cilium-dependent cell motility`GO:0007018^biological_process^microtubule-based movement	GO:0005524^molecular_function^ATP binding`GO:0016887^molecular_function^ATPase activity`GO:0003777^molecular_function^microtubule motor activity`GO:0007018^biological_process^microtubule-based movement`GO:0030286^cellular_component^dynein complex	Yes	No	No	No
c77208_g1_i1	14.835	-1.54884	0.389269	-3.97885	6.92e-05	0.0106708	CE295_HUMAN^CE295_HUMAN^Q:160-1374,H:10-408^36.496%ID^E:1.78e-42^RecName: Full=Centrosomal protein of 295 kDa {ECO:0000312|HGNC:HGNC:29366};^Eukaryota; Metazoa; Chordata; Craniata; Vertebrata; Euteleostomi; Mammalia; Eutheria; Euarchontoglires; Primates; Haplorrhini; Catarrhini; Hominidae; Homo	.	GO:0005814^cellular_component^centriole`GO:0005813^cellular_component^centrosome`GO:0005737^cellular_component^cytoplasm`GO:0005856^cellular_component^cytoskeleton`GO:1902117^biological_process^positive regulation of organelle assembly	.	No	No	No	No
c69390_g2_i1	39.289	-2.08299	0.524102	-3.9744	7.06e-05	0.010723	IQCA1_MOUSE^IQCA1_MOUSE^Q:97-2538,H:1-832^51.609%ID^E:0^RecName: Full=IQ and AAA domain-containing protein 1;^Eukaryota; Metazoa; Chordata; Craniata; Vertebrata; Euteleostomi; Mammalia; Eutheria; Euarchontoglires; Glires; Rodentia; Sciurognathi; Muroidea; Muridae; Murinae; Mus; Mus	PF00612.26^IQ^IQ calmodulin-binding motif^211-228^E:0.011`PF00004.28^AAA^ATPase family associated with various cellular activities (AAA)^582-693^E:5.5e-13	GO:0005524^molecular_function^ATP binding	GO:0005515^molecular_function^protein binding`GO:0005524^molecular_function^ATP binding	No	No	No	No
c42236_g1_i2	40.4842	-6.10483	1.54195	-3.95916	7.52e-05	0.0112928	.	.	.	.	No	No	No	No
c52337_g1_i2	25.6425	-3.94446	0.998918	-3.94873	7.86e-05	0.0116559	MEIG1_NEMVE^MEIG1_NEMVE^Q:125-391,H:1-89^60.674%ID^E:2.22e-29^RecName: Full=Meiosis expressed gene 1 protein homolog;^Eukaryota; Metazoa; Cnidaria; Anthozoa; Hexacorallia; Actiniaria; Edwardsiidae; Nematostella	.	GO:0005634^cellular_component^nucleus	.	No	No	No	No
c41148_g1_i1	26.0389	-2.08473	0.5301	-3.93271	8.4e-05	0.0120532	RIAD1_HUMAN^RIAD1_HUMAN^Q:194-376,H:14-74^63.934%ID^E:5.57e-19^RecName: Full=RIIa domain-containing protein 1;^Eukaryota; Metazoa; Chordata; Craniata; Vertebrata; Euteleostomi; Mammalia; Eutheria; Euarchontoglires; Primates; Haplorrhini; Catarrhini; Hominidae; Homo	.	.	.	No	No	No	No
c50088_g1_i1	15.0954	-4.16262	1.05999	-3.92704	8.6e-05	0.0120532	F166B_XENLA^F166B_XENLA^Q:92-907,H:12-302^37.801%ID^E:2.8e-52^RecName: Full=Protein FAM166B;^Eukaryota; Metazoa; Chordata; Craniata; Vertebrata; Euteleostomi; Amphibia; Batrachia; Anura; Pipoidea; Pipidae; Xenopodinae; Xenopus; Xenopus	PF10629.8^DUF2475^Protein of unknown function (DUF2475)^13-45^E:1.6e-11`PF10629.8^DUF2475^Protein of unknown function (DUF2475)^249-278^E:3.1e-06	.	.	No	No	No	No
c61065_g1_i1	37.0426	-2.58151	0.656939	-3.92961	8.51e-05	0.0120532	CC146_HUMAN^CC146_HUMAN^Q:182-2236,H:23-705^40.292%ID^E:0^RecName: Full=Coiled-coil domain-containing protein 146;^Eukaryota; Metazoa; Chordata; Craniata; Vertebrata; Euteleostomi; Mammalia; Eutheria; Euarchontoglires; Primates; Haplorrhini; Catarrhini; Hominidae; Homo`CC146_HUMAN^CC146_HUMAN^Q:2226-2987,H:702-955^51.575%ID^E:0^RecName: Full=Coiled-coil domain-containing protein 146;^Eukaryota; M…	.	GO:0005814^cellular_component^centriole	.	No	No	No	No
c64434_g1_i1	13.5717	-3.00046	0.764619	-3.92412	8.7e-05	0.0120532	SPAG6_MOUSE^SPAG6_MOUSE^Q:108-1625,H:1-506^88.142%ID^E:0^RecName: Full=Sperm-associated antigen 6;^Eukaryota; Metazoa; Chordata; Craniata; Vertebrata; Euteleostomi; Mammalia; Eutheria; Euarchontoglires; Glires; Rodentia; Sciurognathi; Muroidea; Muridae; Murinae; Mus; Mus	PF00514.22^Arm^Armadillo/beta-catenin-like repeat^114-154^E:1e-09`PF00514.22^Arm^Armadillo/beta-catenin-like repeat^156-195^E:1.7e-06`PF00514.22^Arm^Armadillo/beta-catenin-like repeat^198-237^E:3.6e-06`PF03130.15^HEAT_PBS^PBS lyase HEAT-like repeat^353-384^E:0.13	GO:1990716^cellular_component^axonemal central apparatus`GO:0005737^cellular_component^cytoplasm`GO:0005874^cellular_component^microtubule`GO:0015630^cellular_component^microtubule cytoskeleton`GO:0005634^cellular_component^nucleus`GO:0097228^cellular_component^sperm principal piece`GO:0030317^biological_process^flagellated sperm motility`GO:0007288^biological_process^sperm axoneme assembly`GO:00…	GO:0005515^molecular_function^protein binding	No	No	No	No
c72492_g2_i3	36.3755	-2.58989	0.659901	-3.92466	8.69e-05	0.0120532	ANR26_HUMAN^ANR26_HUMAN^Q:492-3740,H:715-1709^26.339%ID^E:3.74e-57^RecName: Full=Ankyrin repeat domain-containing protein 26;^Eukaryota; Metazoa; Chordata; Craniata; Vertebrata; Euteleostomi; Mammalia; Eutheria; Euarchontoglires; Primates; Haplorrhini; Catarrhini; Hominidae; Homo	PF14915.5^CCDC144C^CCDC144C protein coiled-coil region^350-649^E:6.6e-45	GO:0005813^cellular_component^centrosome	.	No	No	No	No
c76777_g2_i1	54.7567	-3.36222	0.853818	-3.93786	8.22e-05	0.0120532	.	.	.	.	No	No	No	No
c55219_g1_i1	7.03811	-2.1292	0.546792	-3.89399	9.86e-05	0.012104	ECI2_HUMAN^ECI2_HUMAN^Q:57-1178,H:17-391^53.457%ID^E:5.73e-135^RecName: Full=Enoyl-CoA delta isomerase 2, mitochondrial;^Eukaryota; Metazoa; Chordata; Craniata; Vertebrata; Euteleostomi; Mammalia; Eutheria; Euarchontoglires; Primates; Haplorrhini; Catarrhini; Hominidae; Homo	PF00887.18^ACBP^Acyl CoA binding protein^42-120^E:8.7e-28`PF00378.19^ECH_1^Enoyl-CoA hydratase/isomerase^147-388^E:2.5e-37`PF16113.4^ECH_2^Enoyl-CoA hydratase/isomerase^152-351^E:1.1e-17	GO:0043231^cellular_component^intracellular membrane-bounded organelle`GO:0016020^cellular_component^membrane`GO:0005739^cellular_component^mitochondrion`GO:0005654^cellular_component^nucleoplasm`GO:0005782^cellular_component^peroxisomal matrix`GO:0005777^cellular_component^peroxisome`GO:0004165^molecular_function^dodecenoyl-CoA delta-isomerase activity`GO:0000062^molecular_function^fatty-acyl-Co…	GO:0000062^molecular_function^fatty-acyl-CoA binding`GO:0003824^molecular_function^catalytic activity`GO:0008152^biological_process^metabolic process`GO:0003860^molecular_function^3-hydroxyisobutyryl-CoA hydrolase activity	No	No	No	No
c59733_g1_i1	9.1944	3.44519	0.883499	3.89949	9.64e-05	0.012104	.	.	.	.	Yes	No	No	No
c60329_g1_i1	14.3225	-2.62663	0.673884	-3.89774	9.71e-05	0.012104	.	.	.	.	No	No	No	No
c62109_g1_i1	17.4177	-2.91924	0.750558	-3.88942	0.000100482	0.012104	LRIQ3_MOUSE^LRIQ3_MOUSE^Q:443-997,H:49-233^48.108%ID^E:6.57e-51^RecName: Full=Leucine-rich repeat and IQ domain-containing protein 3;^Eukaryota; Metazoa; Chordata; Craniata; Vertebrata; Euteleostomi; Mammalia; Eutheria; Euarchontoglires; Glires; Rodentia; Sciurognathi; Muroidea; Muridae; Murinae; Mus; Mus	PF14580.5^LRR_9^Leucine-rich repeat^100-206^E:7.4e-08`PF00612.26^IQ^IQ calmodulin-binding motif^263-278^E:0.00029	.	GO:0005515^molecular_function^protein binding	No	No	No	No
c62506_g1_i2	13.7839	-4.35597	1.1222	-3.88164	0.000103753	0.012104	SPT45_NEMVE^SPT45_NEMVE^Q:80-265,H:27-90^46.875%ID^E:7.47e-08^RecName: Full=Protein SPATA45 homolog;^Eukaryota; Metazoa; Cnidaria; Anthozoa; Hexacorallia; Actiniaria; Edwardsiidae; Nematostella	.	.	.	No	No	No	No
c63014_g1_i1	15.6177	-2.8556	0.728901	-3.91768	8.94e-05	0.012104	CFA52_MOUSE^CFA52_MOUSE^Q:179-2158,H:9-618^51.958%ID^E:0^RecName: Full=Cilia- and flagella-associated protein 52 {ECO:0000312|MGI:MGI:1919110};^Eukaryota; Metazoa; Chordata; Craniata; Vertebrata; Euteleostomi; Mammalia; Eutheria; Euarchontoglires; Glires; Rodentia; Sciurognathi; Muroidea; Muridae; Murinae; Mus; Mus	PF00400.31^WD40^WD domain, G-beta repeat^61-96^E:0.06`PF00400.31^WD40^WD domain, G-beta repeat^112-140^E:0.064`PF00400.31^WD40^WD domain, G-beta repeat^162-184^E:0.24`PF00400.31^WD40^WD domain, G-beta repeat^453-483^E:0.056`PF00400.31^WD40^WD domain, G-beta repeat^583-622^E:0.025`PF00400.31^WD40^WD domain, G-beta repeat^627-664^E:0.04	GO:0042995^cellular_component^cell projection`GO:0005737^cellular_component^cytoplasm	GO:0005515^molecular_function^protein binding	No	No	No	No
c66677_g1_i2	14.3394	-2.47418	0.635201	-3.89512	9.82e-05	0.012104	ARMC3_HUMAN^ARMC3_HUMAN^Q:123-2069,H:12-607^45.3%ID^E:3.76e-155^RecName: Full=Armadillo repeat-containing protein 3;^Eukaryota; Metazoa; Chordata; Craniata; Vertebrata; Euteleostomi; Mammalia; Eutheria; Euarchontoglires; Primates; Haplorrhini; Catarrhini; Hominidae; Homo`ARMC3_HUMAN^ARMC3_HUMAN^Q:2382-2840,H:717-870^55.195%ID^E:5.24e-45^RecName: Full=Armadillo repeat-containing protein 3;^Eukaryo…	PF00514.22^Arm^Armadillo/beta-catenin-like repeat^144-178^E:2.4e-06`PF13646.5^HEAT_2^HEAT repeats^339-432^E:6.8e-07`PF00514.22^Arm^Armadillo/beta-catenin-like repeat^408-435^E:0.00039`PF00514.22^Arm^Armadillo/beta-catenin-like repeat^438-477^E:1.7e-05`PF00514.22^Arm^Armadillo/beta-catenin-like repeat^530-558^E:3.9e-07`PF14381.5^EDR1^Ethylene-responsive protein kinase Le-CTR1^604-906^E:1.6e-33	GO:0005737^cellular_component^cytoplasm`GO:0070062^cellular_component^extracellular exosome`GO:0005634^cellular_component^nucleus	GO:0005515^molecular_function^protein binding	No	No	No	No
c66875_g1_i1	12.1656	-1.7935	0.460848	-3.89174	9.95e-05	0.012104	IFT74_MOUSE^IFT74_MOUSE^Q:161-1816,H:36-590^54.234%ID^E:7.02e-177^RecName: Full=Intraflagellar transport protein 74 homolog;^Eukaryota; Metazoa; Chordata; Craniata; Vertebrata; Euteleostomi; Mammalia; Eutheria; Euarchontoglires; Glires; Rodentia; Sciurognathi; Muroidea; Muridae; Murinae; Mus; Mus	.	GO:0005813^cellular_component^centrosome`GO:0005929^cellular_component^cilium`GO:0031410^cellular_component^cytoplasmic vesicle`GO:0030992^cellular_component^intraciliary transport particle B`GO:0005634^cellular_component^nucleus`GO:0048487^molecular_function^beta-tubulin binding`GO:0003682^molecular_function^chromatin binding`GO:0060271^biological_process^cilium assembly`GO:0007368^biological_pr…	.	No	No	Yes	No
c66966_g1_i7	24.4437	-2.32856	0.599021	-3.88727	0.000101378	0.012104	DYI2_HELCR^DYI2_HELCR^Q:169-2175,H:54-701^66.17%ID^E:0^RecName: Full=Dynein intermediate chain 2, ciliary;^Eukaryota; Metazoa; Echinodermata; Eleutherozoa; Echinozoa; Echinoidea; Euechinoidea; Echinacea; Echinoida; Echinometridae; Heliocidaris	PF00400.31^WD40^WD domain, G-beta repeat^518-554^E:0.048	GO:0005929^cellular_component^cilium`GO:0005737^cellular_component^cytoplasm`GO:0030286^cellular_component^dynein complex`GO:0005874^cellular_component^microtubule`GO:0003774^molecular_function^motor activity	GO:0005515^molecular_function^protein binding	No	No	No	No
c68011_g1_i3	9.2536	-2.04521	0.526948	-3.88124	0.000103926	0.012104	.	.	.	.	No	No	No	No
c70301_g5_i1	469.829	-1.73375	0.445771	-3.88934	0.000100516	0.012104	TBB_PARLI^TBB_PARLI^Q:93-1382,H:1-430^99.535%ID^E:0^RecName: Full=Tubulin beta chain;^Eukaryota; Metazoa; Echinodermata; Eleutherozoa; Echinozoa; Echinoidea; Euechinoidea; Echinacea; Echinoida; Echinidae; Paracentrotus	PF00091.24^Tubulin^Tubulin/FtsZ family, GTPase domain^3-211^E:4.9e-69`PF03953.16^Tubulin_C^Tubulin C-terminal domain^261-381^E:5.9e-43	GO:0005737^cellular_component^cytoplasm`GO:0005874^cellular_component^microtubule`GO:0005525^molecular_function^GTP binding`GO:0003924^molecular_function^GTPase activity`GO:0005200^molecular_function^structural constituent of cytoskeleton`GO:0007017^biological_process^microtubule-based process	GO:0003924^molecular_function^GTPase activity	Yes	No	No	No
c70388_g1_i2	6.04545	-2.31245	0.595673	-3.88209	0.000103564	0.012104	CAPSL_MOUSE^CAPSL_MOUSE^Q:82-705,H:1-208^61.058%ID^E:4.42e-90^RecName: Full=Calcyphosin-like protein;^Eukaryota; Metazoa; Chordata; Craniata; Vertebrata; Euteleostomi; Mammalia; Eutheria; Euarchontoglires; Glires; Rodentia; Sciurognathi; Muroidea; Muridae; Murinae; Mus; Mus	PF13499.5^EF-hand_7^EF-hand domain pair^46-104^E:2.7e-07`PF13833.5^EF-hand_8^EF-hand domain pair^59-104^E:2.9e-06`PF00036.31^EF-hand_1^EF hand^81-105^E:4.5e-06`PF13405.5^EF-hand_6^EF-hand domain^82-105^E:2.9e-05`PF13202.5^EF-hand_5^EF hand^82-102^E:0.0017`PF13202.5^EF-hand_5^EF hand^117-138^E:0.0012	GO:0005737^cellular_component^cytoplasm`GO:0005509^molecular_function^calcium ion binding	GO:0005509^molecular_function^calcium ion binding	No	No	No	No
c71948_g1_i2	78.3595	-3.13792	0.807229	-3.88727	0.000101378	0.012104	.	PF16977.4^ApeC^C-terminal domain of apextrin^209-416^E:1.9e-51	.	.	Yes	No	No	No
c72078_g1_i1	24.407	-2.36705	0.60455	-3.91539	9.03e-05	0.012104	F161A_XENTR^F161A_XENTR^Q:833-2224,H:191-600^36.966%ID^E:1.87e-58^RecName: Full=Protein FAM161A;^Eukaryota; Metazoa; Chordata; Craniata; Vertebrata; Euteleostomi; Amphibia; Batrachia; Anura; Pipoidea; Pipidae; Xenopodinae; Xenopus; Silurana	PF10595.8^UPF0564^Uncharacterised protein family UPF0564^297-660^E:3.3e-61	GO:0005929^cellular_component^cilium`GO:0005737^cellular_component^cytoplasm`GO:0005856^cellular_component^cytoskeleton`GO:0030030^biological_process^cell projection organization	.	No	No	No	No
c74145_g3_i1	22.313	-3.42255	0.877366	-3.90094	9.58e-05	0.012104	.	.	.	.	No	No	No	No
c75431_g1_i4	22.2278	1.78955	0.457924	3.90796	9.31e-05	0.012104	FGRL1_CHICK^FGRL1_CHICK^Q:434-1489,H:21-378^53.889%ID^E:3.72e-113^RecName: Full=Fibroblast growth factor receptor-like 1;^Eukaryota; Metazoa; Chordata; Craniata; Vertebrata; Euteleostomi; Archelosauria; Archosauria; Dinosauria; Saurischia; Theropoda; Coelurosauria; Aves; Neognathae; Galloanserae; Galliformes; Phasianidae; Phasianinae; Gallus	PF07679.15^I-set^Immunoglobulin I-set domain^33-111^E:3.6e-14`PF00047.24^ig^Immunoglobulin domain^34-105^E:2.4e-05`PF13927.5^Ig_3^Immunoglobulin domain^35-98^E:8.9e-10`PF00047.24^ig^Immunoglobulin domain^153-223^E:9.1e-07`PF07679.15^I-set^Immunoglobulin I-set domain^155-229^E:2.9e-12`PF13927.5^Ig_3^Immunoglobulin domain^157-216^E:8.8e-12`PF13895.5^Ig_2^Immunoglobulin domain^158-220^E:5.8e-09`PF13…	GO:0016021^cellular_component^integral component of membrane`GO:0005886^cellular_component^plasma membrane`GO:0008201^molecular_function^heparin binding`GO:0008285^biological_process^negative regulation of cell proliferation	GO:0005515^molecular_function^protein binding	No	No	No	No
c76777_g1_i1	29.1171	-4.59574	1.17694	-3.90484	9.43e-05	0.012104	.	.	.	.	No	No	No	No
c69530_g1_i1	6.30091	-3.51658	0.907278	-3.87596	0.000106203	0.0122547	IQCH_MOUSE^IQCH_MOUSE^Q:72-3374,H:1-1043^42.172%ID^E:0^RecName: Full=IQ domain-containing protein H;^Eukaryota; Metazoa; Chordata; Craniata; Vertebrata; Euteleostomi; Mammalia; Eutheria; Euarchontoglires; Glires; Rodentia; Sciurognathi; Muroidea; Muridae; Murinae; Mus; Mus	PF00612.26^IQ^IQ calmodulin-binding motif^468-485^E:0.00062	.	GO:0005515^molecular_function^protein binding	No	No	No	No
c38777_g1_i1	10.6858	-2.34513	0.606555	-3.86632	0.000110492	0.0123072	.	.	.	.	No	No	No	No
c66085_g3_i2	32.9332	1.06089	0.274411	3.86606	0.000110609	0.0123072	.	.	.	.	No	No	No	No
c73123_g3_i3	95.2608	1.17727	0.304264	3.86923	0.000109179	0.0123072	.	.	.	.	No	No	No	No
c75648_g1_i2	22.5526	-2.61161	0.675326	-3.86718	0.000110102	0.0123072	AXDN1_HUMAN^AXDN1_HUMAN^Q:153-2642,H:26-821^32.904%ID^E:1.55e-143^RecName: Full=Axonemal dynein light chain domain-containing protein 1;^Eukaryota; Metazoa; Chordata; Craniata; Vertebrata; Euteleostomi; Mammalia; Eutheria; Euarchontoglires; Primates; Haplorrhini; Catarrhini; Hominidae; Homo	PF10211.8^Ax_dynein_light^Axonemal dynein light chain^200-359^E:3.9e-09	.	.	Yes	No	No	No
c60921_g1_i1	20.5025	-1.32475	0.343168	-3.86036	0.000113221	0.0124042	IFT80_RAT^IFT80_RAT^Q:111-2438,H:1-776^63.015%ID^E:0^RecName: Full=Intraflagellar transport protein 80 homolog;^Eukaryota; Metazoa; Chordata; Craniata; Vertebrata; Euteleostomi; Mammalia; Eutheria; Euarchontoglires; Glires; Rodentia; Sciurognathi; Muroidea; Muridae; Murinae; Rattus	PF00400.31^WD40^WD domain, G-beta repeat^137-170^E:0.026`PF00400.31^WD40^WD domain, G-beta repeat^220-252^E:0.14	GO:0005813^cellular_component^centrosome`GO:0005929^cellular_component^cilium`GO:0005737^cellular_component^cytoplasm`GO:0030992^cellular_component^intraciliary transport particle B`GO:0060349^biological_process^bone morphogenesis`GO:0002062^biological_process^chondrocyte differentiation`GO:0060271^biological_process^cilium assembly`GO:0050680^biological_process^negative regulation of epithelial …	GO:0005515^molecular_function^protein binding	No	No	Yes	No
c76048_g1_i1	15.229	-2.43035	0.629654	-3.85982	0.000113471	0.0124042	MYBPP_HUMAN^MYBPP_HUMAN^Q:498-2138,H:67-628^27.682%ID^E:8.92e-26^RecName: Full=MYCBP-associated protein;^Eukaryota; Metazoa; Chordata; Craniata; Vertebrata; Euteleostomi; Mammalia; Eutheria; Euarchontoglires; Primates; Haplorrhini; Catarrhini; Hominidae; Homo	PF14646.5^MYCBPAP^MYCBP-associated protein family^215-639^E:5.3e-66	GO:0005737^cellular_component^cytoplasm`GO:0019897^cellular_component^extrinsic component of plasma membrane`GO:0030154^biological_process^cell differentiation`GO:0007268^biological_process^chemical synaptic transmission`GO:0007275^biological_process^multicellular organism development`GO:0007605^biological_process^sensory perception of sound`GO:0007283^biological_process^spermatogenesis	.	No	No	No	No
c70651_g1_i1	13.8248	-2.44507	0.63408	-3.8561	0.000115211	0.0124848	CCD92_HUMAN^CCD92_HUMAN^Q:101-655,H:16-204^34.197%ID^E:8.49e-14^RecName: Full=Coiled-coil domain-containing protein 92;^Eukaryota; Metazoa; Chordata; Craniata; Vertebrata; Euteleostomi; Mammalia; Eutheria; Euarchontoglires; Primates; Haplorrhini; Catarrhini; Hominidae; Homo	PF14916.5^CCDC92^Coiled-coil domain of unknown function^10-58^E:3.1e-20	GO:0005814^cellular_component^centriole`GO:0005813^cellular_component^centrosome`GO:0043231^cellular_component^intracellular membrane-bounded organelle`GO:0005654^cellular_component^nucleoplasm	.	No	No	No	No
c48458_g1_i1	30.7572	-1.81815	0.472978	-3.84405	0.00012102	0.012866	.	.	.	.	No	No	No	No
c64029_g1_i1	10.8266	-3.25698	0.847636	-3.84242	0.000121825	0.012866	TEX26_MOUSE^TEX26_MOUSE^Q:413-1060,H:62-280^25.225%ID^E:1.32e-10^RecName: Full=Testis-expressed protein 26;^Eukaryota; Metazoa; Chordata; Craniata; Vertebrata; Euteleostomi; Mammalia; Eutheria; Euarchontoglires; Glires; Rodentia; Sciurognathi; Muroidea; Muridae; Murinae; Mus; Mus	.	.	.	No	No	No	No
c72405_g2_i5	20.7961	-1.94491	0.506112	-3.84284	0.00012162	0.012866	.	.	.	.	No	No	No	No
c70957_g1_i2	5.39156	-4.29435	1.11997	-3.83434	0.000125902	0.0130749	C070A_XENLA^C070A_XENLA^Q:56-481,H:1-142^50%ID^E:1.23e-43^RecName: Full=UPF0573 protein C2orf70 homolog A;^Eukaryota; Metazoa; Chordata; Craniata; Vertebrata; Euteleostomi; Amphibia; Batrachia; Anura; Pipoidea; Pipidae; Xenopodinae; Xenopus; Xenopus	PF10629.8^DUF2475^Protein of unknown function (DUF2475)^18-84^E:2.1e-29	.	.	No	No	No	No
c74985_g1_i1	7.92089	-2.41124	0.62861	-3.83583	0.000125143	0.0130749	MIEAP_DANRE^MIEAP_DANRE^Q:58-1392,H:1-445^41.372%ID^E:9.17e-118^RecName: Full=Mitochondria-eating protein;^Eukaryota; Metazoa; Chordata; Craniata; Vertebrata; Euteleostomi; Actinopterygii; Neopterygii; Teleostei; Ostariophysi; Cypriniformes; Cyprinidae; Danio	PF16026.4^MIEAP^Mitochondria-eating protein^255-442^E:1.1e-51	GO:0005737^cellular_component^cytoplasm`GO:0043231^cellular_component^intracellular membrane-bounded organelle`GO:0005741^cellular_component^mitochondrial outer membrane`GO:0006974^biological_process^cellular response to DNA damage stimulus`GO:0035694^biological_process^mitochondrial protein catabolic process`GO:0035695^biological_process^mitophagy by induced vacuole formation	.	No	No	No	No
c51097_g1_i1	8.52027	-3.51939	0.920086	-3.82507	0.000130736	0.0133543	EFHC2_DANRE^EFHC2_DANRE^Q:194-2419,H:1-742^58.658%ID^E:0^RecName: Full=EF-hand domain-containing family member C2;^Eukaryota; Metazoa; Chordata; Craniata; Vertebrata; Euteleostomi; Actinopterygii; Neopterygii; Teleostei; Ostariophysi; Cypriniformes; Cyprinidae; Danio	PF06565.11^DUF1126^DUF1126 PH-like domain^69-174^E:4.1e-33`PF06565.11^DUF1126^DUF1126 PH-like domain^219-357^E:5.5e-34`PF06565.11^DUF1126^DUF1126 PH-like domain^417-525^E:1.2e-32	.	.	No	No	No	No
c59683_g1_i2	48.2352	-2.05612	0.537408	-3.826	0.000130241	0.0133543	LRC23_BOVIN^LRC23_BOVIN^Q:294-1067,H:46-303^62.791%ID^E:2.91e-97^RecName: Full=Leucine-rich repeat-containing protein 23;^Eukaryota; Metazoa; Chordata; Craniata; Vertebrata; Euteleostomi; Mammalia; Eutheria; Laurasiatheria; Cetartiodactyla; Ruminantia; Pecora; Bovidae; Bovinae; Bos	PF13516.5^LRR_6^Leucine Rich repeat^95-108^E:1.5`PF14580.5^LRR_9^Leucine-rich repeat^188-333^E:1.9e-13`PF13516.5^LRR_6^Leucine Rich repeat^225-239^E:0.73	.	GO:0005515^molecular_function^protein binding	No	No	No	No
c7411_g1_i1	35.4172	-4.2908	1.1232	-3.82018	0.000133356	0.0135113	.	.	.	.	No	No	No	No
c70438_g7_i5	20.4921	2.09033	0.548291	3.81245	0.000137597	0.0137178	.	.	.	.	No	No	No	No
c72558_g1_i1	30.128	-1.41071	0.369921	-3.81354	0.000136993	0.0137178	INVS_CHICK^INVS_CHICK^Q:472-1323,H:18-295^27.397%ID^E:6.89e-22^RecName: Full=Inversin;^Eukaryota; Metazoa; Chordata; Craniata; Vertebrata; Euteleostomi; Archelosauria; Archosauria; Dinosauria; Saurischia; Theropoda; Coelurosauria; Aves; Neognathae; Galloanserae; Galliformes; Phasianidae; Phasianinae; Gallus`INVS_CHICK^INVS_CHICK^Q:469-1290,H:224-492^25.623%ID^E:4.27e-09^RecName: Full=Inversin;^Eu…	PF12796.6^Ank_2^Ankyrin repeats (3 copies)^108-171^E:1.9e-06`PF13606.5^Ank_3^Ankyrin repeat^143-171^E:0.0029`PF13637.5^Ank_4^Ankyrin repeats (many copies)^143-187^E:6e-07`PF12796.6^Ank_2^Ankyrin repeats (3 copies)^175-239^E:2.3e-08`PF13857.5^Ank_5^Ankyrin repeats (many copies)^195-246^E:3e-06`PF00023.29^Ank^Ankyrin repeat^209-240^E:0.0035`PF13637.5^Ank_4^Ankyrin repeats (many copies)^211-251^E:8.…	.	GO:0005515^molecular_function^protein binding	No	No	No	No
c72092_g7_i2	33.0999	-2.27752	0.597853	-3.8095	0.000139246	0.0137721	BBOF1_XENLA^BBOF1_XENLA^Q:185-1600,H:35-508^44.937%ID^E:1.02e-109^RecName: Full=Basal body-orientation factor 1;^Eukaryota; Metazoa; Chordata; Craniata; Vertebrata; Euteleostomi; Amphibia; Batrachia; Anura; Pipoidea; Pipidae; Xenopodinae; Xenopus; Xenopus	PF14988.5^DUF4515^Domain of unknown function (DUF4515)^83-268^E:4.3e-16	GO:0036064^cellular_component^ciliary basal body`GO:0005737^cellular_component^cytoplasm`GO:0044458^biological_process^motile cilium assembly	.	No	No	No	No
c74058_g1_i1	50.1121	-2.20252	0.580659	-3.79315	0.000148751	0.0144823	CA158_BOVIN^CA158_BOVIN^Q:67-612,H:4-183^37.705%ID^E:4.24e-32^RecName: Full=Uncharacterized protein C1orf158 homolog;^Eukaryota; Metazoa; Chordata; Craniata; Vertebrata; Euteleostomi; Mammalia; Eutheria; Laurasiatheria; Cetartiodactyla; Ruminantia; Pecora; Bovidae; Bovinae; Bos	.	.	.	No	No	No	No
c76359_g1_i1	42.7688	-2.26392	0.596839	-3.79318	0.000148728	0.0144823	DYH6_HUMAN^DYH6_HUMAN^Q:248-8941,H:33-2880^61.546%ID^E:0^RecName: Full=Dynein heavy chain 6, axonemal;^Eukaryota; Metazoa; Chordata; Craniata; Vertebrata; Euteleostomi; Mammalia; Eutheria; Euarchontoglires; Primates; Haplorrhini; Catarrhini; Hominidae; Homo`DYH6_HUMAN^DYH6_HUMAN^Q:8928-12743,H:2904-4158^64.623%ID^E:0^RecName: Full=Dynein heavy chain 6, axonemal;^Eukaryota; Metazoa; Chordata; Cran…	PF08393.12^DHC_N2^Dynein heavy chain, N-terminal region 2^963-1377^E:5.1e-139`PF12774.6^AAA_6^Hydrolytic ATP binding site of dynein motor region D1^1510-1737^E:1.3e-88`PF07728.13^AAA_5^AAA domain (dynein-related subfamily)^1825-1967^E:2.2e-05`PF12775.6^AAA_7^P-loop containing dynein motor region D3^2132-2403^E:1.5e-53`PF12780.6^AAA_8^P-loop containing dynein motor region D4^2491-2753^E:9.2e-83`PF…	GO:0005858^cellular_component^axonemal dynein complex`GO:0005737^cellular_component^cytoplasm`GO:0005874^cellular_component^microtubule`GO:0005524^molecular_function^ATP binding`GO:0016887^molecular_function^ATPase activity`GO:0003777^molecular_function^microtubule motor activity`GO:0001539^biological_process^cilium or flagellum-dependent cell motility`GO:0007018^biological_process^microtubule-ba…	GO:0005524^molecular_function^ATP binding`GO:0016887^molecular_function^ATPase activity	No	No	No	No
c50109_g1_i1	9.24716	-3.06277	0.808483	-3.78829	0.000151685	0.0144843	TEX33_HUMAN^TEX33_HUMAN^Q:799-1191,H:142-271^30.37%ID^E:8.53e-09^RecName: Full=Testis-expressed protein 33;^Eukaryota; Metazoa; Chordata; Craniata; Vertebrata; Euteleostomi; Mammalia; Eutheria; Euarchontoglires; Primates; Haplorrhini; Catarrhini; Hominidae; Homo	PF15400.5^TEX33^Testis-expressed sequence 33 protein family^230-365^E:2e-26	.	.	No	No	No	No
c59405_g1_i1	36.2252	-1.35087	0.356582	-3.78838	0.000151633	0.0144843	.	PF00612.26^IQ^IQ calmodulin-binding motif^298-317^E:9.7e-05	.	GO:0005515^molecular_function^protein binding	No	No	No	No
c63138_g1_i3	52.9691	-4.40907	1.16416	-3.78736	0.000152258	0.0144843	SPON1_RAT^SPON1_RAT^Q:57-1010,H:352-714^24.409%ID^E:8.55e-11^RecName: Full=Spondin-1;^Eukaryota; Metazoa; Chordata; Craniata; Vertebrata; Euteleostomi; Mammalia; Eutheria; Euarchontoglires; Glires; Rodentia; Sciurognathi; Muroidea; Muridae; Murinae; Rattus`SPON1_RAT^SPON1_RAT^Q:21-914,H:438-765^25.217%ID^E:2.67e-10^RecName: Full=Spondin-1;^Eukaryota; Metazoa; Chordata; Craniata; Vertebrata; Eutel…	PF00090.18^TSP_1^Thrombospondin type 1 domain^81-119^E:0.066`PF00092.27^VWA^von Willebrand factor type A domain^194-381^E:2e-20`PF13519.5^VWA_2^von Willebrand factor type A domain^195-318^E:5.4e-12	GO:0005578^cellular_component^proteinaceous extracellular matrix`GO:0046872^molecular_function^metal ion binding`GO:0007155^biological_process^cell adhesion	.	No	No	No	No
c70126_g2_i1	29.9924	-2.94623	0.779053	-3.78182	0.000155688	0.0146984	CC173_HUMAN^CC173_HUMAN^Q:134-1777,H:9-552^36.559%ID^E:5.52e-30^RecName: Full=Coiled-coil domain-containing protein 173;^Eukaryota; Metazoa; Chordata; Craniata; Vertebrata; Euteleostomi; Mammalia; Eutheria; Euarchontoglires; Primates; Haplorrhini; Catarrhini; Hominidae; Homo	PF13868.5^TPH^Trichohyalin-plectin-homology domain^137-475^E:6.8e-17	.	.	No	No	No	No
c49420_g1_i1	286.721	-4.79619	1.27035	-3.77548	0.0001597	0.0149637	.	.	.	.	No	No	No	No
c61848_g1_i1	16.0324	-3.22747	0.855485	-3.77267	0.000161507	0.0150201	.	.	.	.	No	No	No	No
c76106_g4_i1	51.4151	-1.97657	0.525127	-3.76398	0.00016723	0.0154372	.	.	.	.	No	No	No	No
c66018_g1_i1	5.5095	-2.71887	0.723397	-3.75847	0.000170952	0.0156647	CFA70_MACFA^CFA70_MACFA^Q:144-2360,H:11-765^44.928%ID^E:0^RecName: Full=Cilia- and flagella-associated protein 70 {ECO:0000305};^Eukaryota; Metazoa; Chordata; Craniata; Vertebrata; Euteleostomi; Mammalia; Eutheria; Euarchontoglires; Primates; Haplorrhini; Catarrhini; Cercopithecidae; Cercopithecinae; Macaca`CFA70_MACFA^CFA70_MACFA^Q:3060-3470,H:873-1009^71.533%ID^E:8.76e-46^RecName: Full=Cilia- a…	PF13181.5^TPR_8^Tetratricopeptide repeat^660-690^E:0.12	GO:0005929^cellular_component^cilium`GO:0070062^cellular_component^extracellular exosome	GO:0005515^molecular_function^protein binding	No	No	No	No
c56226_g1_i1	25.1485	-2.22587	0.594381	-3.74486	0.000180496	0.0164186	CCD42_NEMVE^CCD42_NEMVE^Q:98-997,H:1-300^68.333%ID^E:6.04e-118^RecName: Full=Coiled-coil domain-containing protein 42 homolog {ECO:0000305};^Eukaryota; Metazoa; Cnidaria; Anthozoa; Hexacorallia; Actiniaria; Edwardsiidae; Nematostella	PF13863.5^DUF4200^Domain of unknown function (DUF4200)^35-152^E:6.8e-36	.	.	No	No	No	No
c56928_g1_i1	10.9906	-4.95649	1.32466	-3.74171	0.000182772	0.0165051	.	.	.	.	No	No	No	No
c107099_g1_i1	21.8157	1.08401	0.290643	3.7297	0.000191708	0.0168185	.	.	.	.	No	No	No	No
c52753_g1_i1	7.92615	-1.37427	0.367995	-3.73449	0.000188098	0.0168185	.	.	.	.	No	No	No	No
c53473_g1_i1	59.3718	-2.32265	0.623114	-3.72749	0.000193395	0.0168185	.	.	.	.	No	No	No	No
c58802_g1_i2	8.65081	-2.71363	0.728586	-3.72452	0.000195689	0.0168185	DYI3_HELCR^DYI3_HELCR^Q:45-1712,H:1-554^75.18%ID^E:0^RecName: Full=Dynein intermediate chain 3, ciliary;^Eukaryota; Metazoa; Echinodermata; Eleutherozoa; Echinozoa; Echinoidea; Euechinoidea; Echinacea; Echinoida; Echinometridae; Heliocidaris	.	GO:0005929^cellular_component^cilium`GO:0005737^cellular_component^cytoplasm`GO:0030286^cellular_component^dynein complex`GO:0005874^cellular_component^microtubule`GO:0003774^molecular_function^motor activity	.	No	No	No	No
c64443_g1_i1	15.5697	-3.6722	0.985829	-3.72499	0.000195322	0.0168185	CNBD2_HUMAN^CNBD2_HUMAN^Q:1202-1894,H:67-294^28.017%ID^E:6.4e-16^RecName: Full=Cyclic nucleotide-binding domain-containing protein 2;^Eukaryota; Metazoa; Chordata; Craniata; Vertebrata; Euteleostomi; Mammalia; Eutheria; Euarchontoglires; Primates; Haplorrhini; Catarrhini; Hominidae; Homo	PF00027.28^cNMP_binding^Cyclic nucleotide-binding domain^316-405^E:1.1e-16	GO:0005829^cellular_component^cytosol`GO:0030552^molecular_function^cAMP binding`GO:0007283^biological_process^spermatogenesis	.	No	No	No	No
c67997_g2_i2	25.0812	-3.68663	0.988868	-3.72813	0.000192907	0.0168185	KPYM_HUMAN^KPYM_HUMAN^Q:210-1718,H:25-531^68.442%ID^E:0^RecName: Full=Pyruvate kinase PKM;^Eukaryota; Metazoa; Chordata; Craniata; Vertebrata; Euteleostomi; Mammalia; Eutheria; Euarchontoglires; Primates; Haplorrhini; Catarrhini; Hominidae; Homo	PF00224.20^PK^Pyruvate kinase, barrel domain^88-435^E:2.9e-162`PF02887.15^PK_C^Pyruvate kinase, alpha/beta domain^452-569^E:7e-34	GO:0005929^cellular_component^cilium`GO:0005737^cellular_component^cytoplasm`GO:0005829^cellular_component^cytosol`GO:0070062^cellular_component^extracellular exosome`GO:0031012^cellular_component^extracellular matrix`GO:0005576^cellular_component^extracellular region`GO:1903561^cellular_component^extracellular vesicle`GO:1904813^cellular_component^ficolin-1-rich granule lumen`GO:0005739^cellular…	GO:0000287^molecular_function^magnesium ion binding`GO:0004743^molecular_function^pyruvate kinase activity`GO:0030955^molecular_function^potassium ion binding`GO:0006096^biological_process^glycolytic process	Yes	No	No	No
c76042_g2_i3	26.091	-4.89127	1.31128	-3.73014	0.000191372	0.0168185	.	.	.	.	No	No	No	No
c77531_g2_i1	38.8521	-1.93321	0.519321	-3.72258	0.000197198	0.0168321	DYH1B_CHLRE^DYH1B_CHLRE^Q:4489-6423,H:2818-3441^26.537%ID^E:6.27e-63^RecName: Full=Dynein-1-beta heavy chain, flagellar inner arm I1 complex;^Eukaryota; Viridiplantae; Chlorophyta; Chlorophyceae; Chlamydomonadales; Chlamydomonadaceae; Chlamydomonas`DYH1B_CHLRE^DYH1B_CHLRE^Q:7354-10383,H:3533-4470^21.47%ID^E:4.47e-50^RecName: Full=Dynein-1-beta heavy chain, flagellar inner arm I1 complex;^Eukaryot…	PF12774.6^AAA_6^Hydrolytic ATP binding site of dynein motor region D1^177-283^E:1.1e-17`PF12775.6^AAA_7^P-loop containing dynein motor region D3^862-1121^E:2.1e-19`PF12780.6^AAA_8^P-loop containing dynein motor region D4^1497-1773^E:2e-24`PF12777.6^MT^Microtubule-binding stalk of dynein motor^1848-2117^E:2.6e-31`PF12781.6^AAA_9^ATP-binding dynein motor region D5^2253-2303^E:1.9e-08`PF12781.6^AAA_…	GO:0005930^cellular_component^axoneme`GO:0005737^cellular_component^cytoplasm`GO:0036156^cellular_component^inner dynein arm`GO:0005874^cellular_component^microtubule`GO:0031514^cellular_component^motile cilium`GO:0005524^molecular_function^ATP binding`GO:0016887^molecular_function^ATPase activity`GO:0008017^molecular_function^microtubule binding`GO:0003777^molecular_function^microtubule motor ac…	GO:0003777^molecular_function^microtubule motor activity`GO:0007018^biological_process^microtubule-based movement`GO:0030286^cellular_component^dynein complex	Yes	No	No	No
c76889_g1_i3	54.4206	-1.91481	0.516931	-3.7042	0.00021206	0.0179775	DYH10_HUMAN^DYH10_HUMAN^Q:2-11638,H:618-4471^67.878%ID^E:0^RecName: Full=Dynein heavy chain 10, axonemal;^Eukaryota; Metazoa; Chordata; Craniata; Vertebrata; Euteleostomi; Mammalia; Eutheria; Euarchontoglires; Primates; Haplorrhini; Catarrhini; Hominidae; Homo	PF08385.11^DHC_N1^Dynein heavy chain, N-terminal region 1^1-159^E:1.4e-32`PF08393.12^DHC_N2^Dynein heavy chain, N-terminal region 2^657-1062^E:2.3e-145`PF12774.6^AAA_6^Hydrolytic ATP binding site of dynein motor region D1^1198-1428^E:1.7e-101`PF07728.13^AAA_5^AAA domain (dynein-related subfamily)^1514-1628^E:2.8e-06`PF12775.6^AAA_7^P-loop containing dynein motor region D3^1824-2091^E:8.9e-58`PF07…	GO:0005929^cellular_component^cilium`GO:0005737^cellular_component^cytoplasm`GO:0030286^cellular_component^dynein complex`GO:0005874^cellular_component^microtubule`GO:0005524^molecular_function^ATP binding`GO:0016887^molecular_function^ATPase activity`GO:0003777^molecular_function^microtubule motor activity`GO:0007018^biological_process^microtubule-based movement	GO:0005524^molecular_function^ATP binding`GO:0016887^molecular_function^ATPase activity`GO:0003777^molecular_function^microtubule motor activity`GO:0007018^biological_process^microtubule-based movement`GO:0030286^cellular_component^dynein complex	No	No	No	No
c46737_g1_i1	16.8407	-3.03857	0.8259	-3.67911	0.000234054	0.018848	TEKT2_HUMAN^TEKT2_HUMAN^Q:232-1425,H:1-399^61.905%ID^E:1.8e-162^RecName: Full=Tektin-2;^Eukaryota; Metazoa; Chordata; Craniata; Vertebrata; Euteleostomi; Mammalia; Eutheria; Euarchontoglires; Primates; Haplorrhini; Catarrhini; Hominidae; Homo	PF03148.13^Tektin^Tektin family^16-396^E:1e-142	GO:0005737^cellular_component^cytoplasm`GO:0005874^cellular_component^microtubule`GO:0005634^cellular_component^nucleus`GO:0036126^cellular_component^sperm flagellum`GO:0060271^biological_process^cilium assembly`GO:0060294^biological_process^cilium movement involved in cell motility`GO:0030317^biological_process^flagellated sperm motility`GO:0036159^biological_process^inner dynein arm assembly	.	No	No	No	No
c63040_g1_i6	21.9704	-3.01062	0.818464	-3.67837	0.000234726	0.018848	.	.	.	.	No	No	No	No
c64536_g1_i2	24.1199	-5.99437	1.63005	-3.67741	0.000235616	0.018848	TSSK2_MOUSE^TSSK2_MOUSE^Q:94-930,H:2-286^57.544%ID^E:5.62e-99^RecName: Full=Testis-specific serine/threonine-protein kinase 2;^Eukaryota; Metazoa; Chordata; Craniata; Vertebrata; Euteleostomi; Mammalia; Eutheria; Euarchontoglires; Glires; Rodentia; Sciurognathi; Muroidea; Muridae; Murinae; Mus; Mus	PF00069.24^Pkinase^Protein kinase domain^16-270^E:9.5e-71`PF07714.16^Pkinase_Tyr^Protein tyrosine kinase^18-264^E:1.4e-40`PF14531.5^Kinase-like^Kinase-like^121-258^E:6.5e-09	GO:0001669^cellular_component^acrosomal vesicle`GO:0005814^cellular_component^centriole`GO:0005737^cellular_component^cytoplasm`GO:0005634^cellular_component^nucleus`GO:0005524^molecular_function^ATP binding`GO:0000287^molecular_function^magnesium ion binding`GO:0004674^molecular_function^protein serine/threonine kinase activity`GO:0035556^biological_process^intracellular signal transduction`GO:0…	GO:0004672^molecular_function^protein kinase activity`GO:0005524^molecular_function^ATP binding`GO:0006468^biological_process^protein phosphorylation	No	No	Yes	No
c68693_g1_i1	10.1704	2.51774	0.683506	3.68356	0.000229995	0.018848	.	.	.	.	No	No	No	No
c68838_g1_i1	57.9283	-2.55842	0.69361	-3.68856	0.000225525	0.018848	FLTOP_NEMVE^FLTOP_NEMVE^Q:117-326,H:1-70^65.714%ID^E:6.2e-29^RecName: Full=Protein Flattop homolog {ECO:0000305};^Eukaryota; Metazoa; Cnidaria; Anthozoa; Hexacorallia; Actiniaria; Edwardsiidae; Nematostella	.	GO:0016324^cellular_component^apical plasma membrane`GO:0036064^cellular_component^ciliary basal body`GO:0005929^cellular_component^cilium`GO:0005737^cellular_component^cytoplasm`GO:0044782^biological_process^cilium organization	.	No	No	No	No
c70104_g1_i2	15.9795	-2.98003	0.809323	-3.68213	0.000231295	0.018848	ARMC4_MOUSE^ARMC4_MOUSE^Q:1366-3198,H:437-1037^74.715%ID^E:0^RecName: Full=Armadillo repeat-containing protein 4;^Eukaryota; Metazoa; Chordata; Craniata; Vertebrata; Euteleostomi; Mammalia; Eutheria; Euarchontoglires; Glires; Rodentia; Sciurognathi; Muroidea; Muridae; Murinae; Mus; Mus`ARMC4_MOUSE^ARMC4_MOUSE^Q:22-1026,H:19-326^36.795%ID^E:6.24e-49^RecName: Full=Armadillo repeat-containing protei…	PF00514.22^Arm^Armadillo/beta-catenin-like repeat^633-671^E:3.5e-05`PF00514.22^Arm^Armadillo/beta-catenin-like repeat^716-751^E:2.2e-05`PF00514.22^Arm^Armadillo/beta-catenin-like repeat^799-833^E:0.00013`PF00514.22^Arm^Armadillo/beta-catenin-like repeat^1016-1053^E:0.0004	GO:0005930^cellular_component^axoneme`GO:0097546^cellular_component^ciliary base`GO:0005737^cellular_component^cytoplasm`GO:0005634^cellular_component^nucleus`GO:0003341^biological_process^cilium movement`GO:0007368^biological_process^determination of left/right symmetry`GO:0007507^biological_process^heart development`GO:0036158^biological_process^outer dynein arm assembly`GO:0003356^biological_p…	GO:0005515^molecular_function^protein binding	No	No	No	No
c70159_g8_i1	28.7524	-1.53501	0.415991	-3.69	0.000224254	0.018848	.	.	.	.	No	No	No	No
c73230_g1_i4	33.4113	-2.07788	0.563963	-3.68443	0.000229217	0.018848	DRC7_XENTR^DRC7_XENTR^Q:395-2773,H:68-853^52.196%ID^E:0^RecName: Full=Dynein regulatory complex subunit 7;^Eukaryota; Metazoa; Chordata; Craniata; Vertebrata; Euteleostomi; Amphibia; Batrachia; Anura; Pipoidea; Pipidae; Xenopodinae; Xenopus; Silurana	.	GO:0005737^cellular_component^cytoplasm`GO:0005856^cellular_component^cytoskeleton`GO:0031514^cellular_component^motile cilium	.	No	No	No	No
c76843_g3_i3	7.95914	-3.41389	0.928429	-3.67706	0.00023594	0.018848	WDR66_HUMAN^WDR66_HUMAN^Q:2015-3541,H:638-1148^51.272%ID^E:0^RecName: Full=WD repeat-containing protein 66;^Eukaryota; Metazoa; Chordata; Craniata; Vertebrata; Euteleostomi; Mammalia; Eutheria; Euarchontoglires; Primates; Haplorrhini; Catarrhini; Hominidae; Homo`WDR66_HUMAN^WDR66_HUMAN^Q:814-2016,H:249-638^43.672%ID^E:0^RecName: Full=WD repeat-containing protein 66;^Eukaryota; Metazoa; Chordata; …	PF00400.31^WD40^WD domain, G-beta repeat^271-309^E:2.7e-06`PF00400.31^WD40^WD domain, G-beta repeat^594-625^E:0.13	.	GO:0005515^molecular_function^protein binding	No	No	No	No
c58687_g1_i1	38.8213	-1.25078	0.340718	-3.67101	0.000241597	0.019011	.	.	.	.	No	No	No	No
c63159_g1_i1	13.1339	-2.28063	0.62142	-3.67003	0.000242525	0.019011	.	.	.	.	No	No	No	No
c77516_g1_i1	39.5244	-2.05805	0.560776	-3.66999	0.000242557	0.019011	DYH7_RAT^DYH7_RAT^Q:2-7000,H:1731-4056^71.221%ID^E:0^RecName: Full=Dynein heavy chain 7, axonemal;^Eukaryota; Metazoa; Chordata; Craniata; Vertebrata; Euteleostomi; Mammalia; Eutheria; Euarchontoglires; Glires; Rodentia; Sciurognathi; Muroidea; Muridae; Murinae; Rattus	PF12775.6^AAA_7^P-loop containing dynein motor region D3^249-519^E:6.9e-51`PF12780.6^AAA_8^P-loop containing dynein motor region D4^618-882^E:4.5e-71`PF12777.6^MT^Microtubule-binding stalk of dynein motor^895-1240^E:1.3e-50`PF12781.6^AAA_9^ATP-binding dynein motor region D5^1270-1490^E:6.2e-94`PF03028.14^Dynein_heavy^Dynein heavy chain and region D6 of dynein motor^1628-2330^E:1.4e-292	GO:0005929^cellular_component^cilium`GO:0005737^cellular_component^cytoplasm`GO:0030286^cellular_component^dynein complex`GO:0005874^cellular_component^microtubule`GO:0005524^molecular_function^ATP binding`GO:0005509^molecular_function^calcium ion binding`GO:0003777^molecular_function^microtubule motor activity`GO:0007018^biological_process^microtubule-based movement	GO:0003777^molecular_function^microtubule motor activity`GO:0007018^biological_process^microtubule-based movement`GO:0030286^cellular_component^dynein complex	Yes	No	No	No
c58915_g1_i1	8.13472	-2.9789	0.813507	-3.6618	0.000250452	0.0195071	TEKT1_HUMAN^TEKT1_HUMAN^Q:210-1409,H:11-405^51.5%ID^E:1.59e-128^RecName: Full=Tektin-1;^Eukaryota; Metazoa; Chordata; Craniata; Vertebrata; Euteleostomi; Mammalia; Eutheria; Euarchontoglires; Primates; Haplorrhini; Catarrhini; Hominidae; Homo	PF03148.13^Tektin^Tektin family^10-372^E:8e-143	GO:0005737^cellular_component^cytoplasm`GO:0005874^cellular_component^microtubule`GO:0005634^cellular_component^nucleus`GO:0036126^cellular_component^sperm flagellum`GO:0060271^biological_process^cilium assembly`GO:0060294^biological_process^cilium movement involved in cell motility`GO:0030317^biological_process^flagellated sperm motility	.	No	No	No	No
c61043_g1_i1	26.0029	-4.6585	1.27413	-3.65621	0.000255967	0.0196245	TRI13_XENTR^TRI13_XENTR^Q:342-623,H:8-91^29.787%ID^E:1.23e-06^RecName: Full=Tripartite motif containing 13;^Eukaryota; Metazoa; Chordata; Craniata; Vertebrata; Euteleostomi; Amphibia; Batrachia; Anura; Pipoidea; Pipidae; Xenopodinae; Xenopus; Silurana	PF13923.5^zf-C3HC4_2^Zinc finger, C3HC4 type (RING finger)^20-47^E:1e-07`PF13639.5^zf-RING_2^Ring finger domain^20-75^E:7.6e-07`PF13445.5^zf-RING_UBOX^RING-type zinc-finger^21-47^E:3.1e-09`PF00097.24^zf-C3HC4^Zinc finger, C3HC4 type (RING finger)^21-74^E:4.4e-08`PF15227.5^zf-C3HC4_4^zinc finger of C3HC4-type, RING^21-48^E:2.1e-07	GO:0005789^cellular_component^endoplasmic reticulum membrane`GO:0016021^cellular_component^integral component of membrane`GO:0016874^molecular_function^ligase activity`GO:0008270^molecular_function^zinc ion binding`GO:0016567^biological_process^protein ubiquitination	GO:0005515^molecular_function^protein binding`GO:0008270^molecular_function^zinc ion binding`GO:0046872^molecular_function^metal ion binding	No	No	No	No
c67749_g1_i5	5.90334	-2.80616	0.767656	-3.6555	0.000256683	0.0196245	KAD9_HUMAN^KAD9_HUMAN^Q:149-763,H:237-440^48.544%ID^E:2.22e-39^RecName: Full=Adenylate kinase 9;^Eukaryota; Metazoa; Chordata; Craniata; Vertebrata; Euteleostomi; Mammalia; Eutheria; Euarchontoglires; Primates; Haplorrhini; Catarrhini; Hominidae; Homo`KAD9_HUMAN^KAD9_HUMAN^Q:1772-2437,H:819-1040^44.395%ID^E:8.24e-30^RecName: Full=Adenylate kinase 9;^Eukaryota; Metazoa; Chordata; Craniata; Vertebr…	PF17213.2^Hydin_ADK^Hydin Adenylate kinase-like domain^210-386^E:2.5e-07`PF12018.7^FAP206^Domain of unknown function^641-753^E:1.2e-07	GO:0005737^cellular_component^cytoplasm`GO:0005829^cellular_component^cytosol`GO:0031965^cellular_component^nuclear membrane`GO:0005654^cellular_component^nucleoplasm`GO:0005634^cellular_component^nucleus`GO:0005524^molecular_function^ATP binding`GO:0004550^molecular_function^nucleoside diphosphate kinase activity`GO:0019206^molecular_function^nucleoside kinase activity`GO:0050145^molecular_funct…	.	No	No	No	No
c68036_g1_i1	6.90339	-2.32221	0.635191	-3.65592	0.000256261	0.0196245	EFCB5_HUMAN^EFCB5_HUMAN^Q:1513-3471,H:805-1478^40.206%ID^E:7.11e-148^RecName: Full=EF-hand calcium-binding domain-containing protein 5;^Eukaryota; Metazoa; Chordata; Craniata; Vertebrata; Euteleostomi; Mammalia; Eutheria; Euarchontoglires; Primates; Haplorrhini; Catarrhini; Hominidae; Homo`EFCB5_HUMAN^EFCB5_HUMAN^Q:391-1284,H:152-442^36.213%ID^E:1.23e-43^RecName: Full=EF-hand calcium-binding doma…	PF01590.25^GAF^GAF domain^718-811^E:9.9e-05	GO:0005509^molecular_function^calcium ion binding	GO:0005515^molecular_function^protein binding	No	No	No	No
c72235_g1_i1	41.9667	-2.18993	0.600204	-3.64865	0.000263626	0.0200323	SPG16_HUMAN^SPG16_HUMAN^Q:62-1891,H:42-631^49.837%ID^E:0^RecName: Full=Sperm-associated antigen 16 protein;^Eukaryota; Metazoa; Chordata; Craniata; Vertebrata; Euteleostomi; Mammalia; Eutheria; Euarchontoglires; Primates; Haplorrhini; Catarrhini; Hominidae; Homo	PF00400.31^WD40^WD domain, G-beta repeat^344-378^E:0.023`PF00400.31^WD40^WD domain, G-beta repeat^386-421^E:1.3e-06`PF00400.31^WD40^WD domain, G-beta repeat^426-463^E:3.2e-07`PF00400.31^WD40^WD domain, G-beta repeat^468-505^E:1.4e-06`PF00400.31^WD40^WD domain, G-beta repeat^511-547^E:0.0013`PF00400.31^WD40^WD domain, G-beta repeat^597-630^E:4.2e-07	GO:1990716^cellular_component^axonemal central apparatus`GO:0005930^cellular_component^axoneme`GO:0005737^cellular_component^cytoplasm`GO:0031514^cellular_component^motile cilium`GO:0005634^cellular_component^nucleus`GO:0035082^biological_process^axoneme assembly`GO:0097231^biological_process^cell motility in response to calcium ion`GO:0060271^biological_process^cilium assembly`GO:0060294^biologi…	GO:0005515^molecular_function^protein binding	No	No	No	No
c75939_g2_i1	6.47866	-1.65692	0.454707	-3.64393	0.000268503	0.0202793	.	.	.	.	No	No	No	No
c51458_g1_i1	21.657	-2.45628	0.675183	-3.63795	0.00027482	0.0206314	.	.	.	.	No	No	No	No
c67571_g1_i2	348.697	-3.56514	0.981802	-3.63122	0.000282087	0.0209248	KARG_HALMK^KARG_HALMK^Q:131-1174,H:4-353^67.429%ID^E:2.7e-174^RecName: Full=Arginine kinase;^Eukaryota; Metazoa; Lophotrochozoa; Mollusca; Gastropoda; Vetigastropoda; Haliotoidea; Haliotidae; Haliotis	PF02807.14^ATP-gua_PtransN^ATP:guanido phosphotransferase, N-terminal domain^34-99^E:6.1e-24`PF00217.18^ATP-gua_Ptrans^ATP:guanido phosphotransferase, C-terminal catalytic domain^160-367^E:9.6e-84	GO:0004054^molecular_function^arginine kinase activity`GO:0005524^molecular_function^ATP binding	GO:0016301^molecular_function^kinase activity`GO:0016772^molecular_function^transferase activity, transferring phosphorus-containing groups	Yes	No	No	No
c73912_g1_i1	104.134	-1.89775	0.522494	-3.6321	0.000281119	0.0209248	MPIP2_MOUSE^MPIP2_MOUSE^Q:871-2328,H:106-567^35.4%ID^E:1.62e-75^RecName: Full=M-phase inducer phosphatase 2;^Eukaryota; Metazoa; Chordata; Craniata; Vertebrata; Euteleostomi; Mammalia; Eutheria; Euarchontoglires; Glires; Rodentia; Sciurognathi; Muroidea; Muridae; Murinae; Mus; Mus	PF06617.12^M-inducer_phosp^M-phase inducer phosphatase^94-376^E:4.1e-22`PF00581.19^Rhodanese^Rhodanese-like domain^435-533^E:2e-13	GO:0005813^cellular_component^centrosome`GO:0005737^cellular_component^cytoplasm`GO:0005634^cellular_component^nucleus`GO:0000922^cellular_component^spindle pole`GO:0019901^molecular_function^protein kinase binding`GO:0004725^molecular_function^protein tyrosine phosphatase activity`GO:0051301^biological_process^cell division`GO:0007144^biological_process^female meiosis I`GO:0007067^biological_pro…	GO:0004725^molecular_function^protein tyrosine phosphatase activity`GO:0000087^biological_process^mitotic M phase`GO:0006470^biological_process^protein dephosphorylation`GO:0005622^cellular_component^intracellular	No	No	No	No
c53191_g1_i1	13.9423	-2.63198	0.726445	-3.62309	0.000291104	0.0212929	.	.	.	.	No	No	No	No
c68328_g1_i1	6.27497	-2.85662	0.788654	-3.62214	0.000292175	0.0212929	LKAM1_HUMAN^LKAM1_HUMAN^Q:381-545,H:105-159^50.909%ID^E:9e-07^RecName: Full=Protein LKAAEAR1;^Eukaryota; Metazoa; Chordata; Craniata; Vertebrata; Euteleostomi; Mammalia; Eutheria; Euarchontoglires; Primates; Haplorrhini; Catarrhini; Hominidae; Homo	PF15478.5^LKAAEAR^Family of unknown function with LKAAEAR motif^18-154^E:1.1e-49	.	.	No	No	No	No
c73952_g1_i1	17.0132	-1.45167	0.40045	-3.62509	0.000288865	0.0212929	.	.	.	.	No	No	No	No
c31231_g1_i2	25.5464	-2.65672	0.734932	-3.61492	0.000300444	0.0217682	MORN2_BOVIN^MORN2_BOVIN^Q:311-547,H:1-79^56.962%ID^E:2.09e-23^RecName: Full=MORN repeat-containing protein 2;^Eukaryota; Metazoa; Chordata; Craniata; Vertebrata; Euteleostomi; Mammalia; Eutheria; Laurasiatheria; Cetartiodactyla; Ruminantia; Pecora; Bovidae; Bovinae; Bos	PF02493.19^MORN^MORN repeat^19-28^E:2`PF02493.19^MORN^MORN repeat^30-37^E:290`PF02493.19^MORN^MORN repeat^44-57^E:9.8`PF02493.19^MORN^MORN repeat^58-79^E:3.3e-07`PF02493.19^MORN^MORN repeat^81-102^E:4.2e-09`PF02493.19^MORN^MORN repeat^104-124^E:2.4	.	.	No	No	No	No
c44945_g1_i1	6.83863	-2.63467	0.730927	-3.60456	0.000312677	0.0221684	.	.	.	.	No	No	No	No
c56704_g1_i1	40.7463	-1.30306	0.361725	-3.60236	0.000315337	0.0221684	IF20A_XENLA^IF20A_XENLA^Q:39-434,H:1-132^75%ID^E:3.78e-56^RecName: Full=Intraflagellar transport protein 20 homolog A;^Eukaryota; Metazoa; Chordata; Craniata; Vertebrata; Euteleostomi; Amphibia; Batrachia; Anura; Pipoidea; Pipidae; Xenopodinae; Xenopus; Xenopus	PF14931.5^IFT20^Intraflagellar transport complex B, subunit 20^10-128^E:1e-50	GO:0005814^cellular_component^centriole`GO:0005929^cellular_component^cilium`GO:0005794^cellular_component^Golgi apparatus`GO:0030030^biological_process^cell projection organization	.	No	No	No	No
c60624_g2_i1	12.7761	-2.53269	0.703815	-3.59852	0.000320037	0.0221684	CJ107_MOUSE^CJ107_MOUSE^Q:1-396,H:72-207^40.146%ID^E:8.36e-21^RecName: Full=Uncharacterized protein C10orf107 homolog;^Eukaryota; Metazoa; Chordata; Craniata; Vertebrata; Euteleostomi; Mammalia; Eutheria; Euarchontoglires; Glires; Rodentia; Sciurognathi; Muroidea; Muridae; Murinae; Mus; Mus	.	.	.	No	No	No	No
c68764_g1_i1	69.3811	-1.0085	0.279943	-3.60251	0.000315161	0.0221684	IFT57_BOVIN^IFT57_BOVIN^Q:147-1343,H:26-419^64.662%ID^E:4.2e-173^RecName: Full=Intraflagellar transport protein 57 homolog;^Eukaryota; Metazoa; Chordata; Craniata; Vertebrata; Euteleostomi; Mammalia; Eutheria; Laurasiatheria; Cetartiodactyla; Ruminantia; Pecora; Bovidae; Bovinae; Bos	PF10498.8^IFT57^Intra-flagellar transport protein 57^28-390^E:4.3e-154	GO:0005930^cellular_component^axoneme`GO:0005813^cellular_component^centrosome`GO:0036064^cellular_component^ciliary basal body`GO:0005929^cellular_component^cilium`GO:0044292^cellular_component^dendrite terminus`GO:0005794^cellular_component^Golgi apparatus`GO:0030992^cellular_component^intraciliary transport particle B`GO:0032391^cellular_component^photoreceptor connecting cilium`GO:0003677^mol…	.	No	No	Yes	No
c73096_g1_i5	132.046	-0.965231	0.267613	-3.60682	0.000309973	0.0221684	LRC71_MOUSE^LRC71_MOUSE^Q:646-1494,H:36-319^41.754%ID^E:1.24e-63^RecName: Full=Leucine-rich repeat-containing protein 71;^Eukaryota; Metazoa; Chordata; Craniata; Vertebrata; Euteleostomi; Mammalia; Eutheria; Euarchontoglires; Glires; Rodentia; Sciurognathi; Muroidea; Muridae; Murinae; Mus; Mus`LRC71_MOUSE^LRC71_MOUSE^Q:2949-3233,H:449-545^39.175%ID^E:1.13e-11^RecName: Full=Leucine-rich repeat-con…	PF13516.5^LRR_6^Leucine Rich repeat^214-232^E:0.03`PF13516.5^LRR_6^Leucine Rich repeat^243-264^E:3.5e-05`PF13516.5^LRR_6^Leucine Rich repeat^271-292^E:0.00031	.	GO:0005515^molecular_function^protein binding	No	No	No	No
c77254_g1_i1	31.9661	-1.60236	0.445046	-3.60044	0.000317675	0.0221684	DYHB_CHLRE^DYHB_CHLRE^Q:2-3979,H:2218-3471^26.686%ID^E:5.23e-138^RecName: Full=Dynein beta chain, flagellar outer arm;^Eukaryota; Viridiplantae; Chlorophyta; Chlorophyceae; Chlamydomonadales; Chlamydomonadaceae; Chlamydomonas`DYHB_CHLRE^DYHB_CHLRE^Q:5900-8557,H:3812-4566^22.148%ID^E:2.57e-24^RecName: Full=Dynein beta chain, flagellar outer arm;^Eukaryota; Viridiplantae; Chlorophyta; Chlorophyceae…	PF12775.6^AAA_7^P-loop containing dynein motor region D3^302-588^E:1.7e-35`PF12780.6^AAA_8^P-loop containing dynein motor region D4^689-956^E:1.6e-31`PF12777.6^MT^Microtubule-binding stalk of dynein motor^993-1315^E:3.1e-29`PF12781.6^AAA_9^ATP-binding dynein motor region D5^1541-1736^E:1.7e-33`PF03028.14^Dynein_heavy^Dynein heavy chain and region D6 of dynein motor^2026-2851^E:1e-106	GO:0005737^cellular_component^cytoplasm`GO:0030286^cellular_component^dynein complex`GO:0005874^cellular_component^microtubule`GO:0031514^cellular_component^motile cilium`GO:0005524^molecular_function^ATP binding`GO:0016887^molecular_function^ATPase activity`GO:0003777^molecular_function^microtubule motor activity`GO:0030030^biological_process^cell projection organization`GO:0007018^biological_pr…	GO:0003777^molecular_function^microtubule motor activity`GO:0007018^biological_process^microtubule-based movement`GO:0030286^cellular_component^dynein complex	Yes	No	No	No
c88342_g1_i1	35.5394	-6.941	1.92892	-3.59839	0.000320198	0.0221684	TSSK4_MOUSE^TSSK4_MOUSE^Q:254-1090,H:4-293^41.017%ID^E:1.09e-70^RecName: Full=Testis-specific serine/threonine-protein kinase 4;^Eukaryota; Metazoa; Chordata; Craniata; Vertebrata; Euteleostomi; Mammalia; Eutheria; Euarchontoglires; Glires; Rodentia; Sciurognathi; Muroidea; Muridae; Murinae; Mus; Mus	PF00069.24^Pkinase^Protein kinase domain^66-321^E:2.1e-66`PF07714.16^Pkinase_Tyr^Protein tyrosine kinase^67-315^E:2.8e-38	GO:0001669^cellular_component^acrosomal vesicle`GO:0031514^cellular_component^motile cilium`GO:0005634^cellular_component^nucleus`GO:0005524^molecular_function^ATP binding`GO:0000287^molecular_function^magnesium ion binding`GO:0004674^molecular_function^protein serine/threonine kinase activity`GO:0030154^biological_process^cell differentiation`GO:0035556^biological_process^intracellular signal tr…	GO:0004672^molecular_function^protein kinase activity`GO:0005524^molecular_function^ATP binding`GO:0006468^biological_process^protein phosphorylation	No	No	Yes	No
c98329_g1_i1	6.38865	2.28351	0.63284	3.60835	0.000308145	0.0221684	.	.	.	.	No	No	No	No
c62103_g3_i1	12.3567	-3.50008	0.974373	-3.59214	0.000327977	0.0223357	ANR60_HUMAN^ANR60_HUMAN^Q:282-917,H:94-308^38.605%ID^E:5.3e-36^RecName: Full=Ankyrin repeat domain-containing protein 60;^Eukaryota; Metazoa; Chordata; Craniata; Vertebrata; Euteleostomi; Mammalia; Eutheria; Euarchontoglires; Primates; Haplorrhini; Catarrhini; Hominidae; Homo	PF14560.5^Ubiquitin_2^Ubiquitin-like domain^29-65^E:0.0087`PF12796.6^Ank_2^Ankyrin repeats (3 copies)^140-204^E:1.4e-12`PF13637.5^Ank_4^Ankyrin repeats (many copies)^144-191^E:2.3e-10`PF13857.5^Ank_5^Ankyrin repeats (many copies)^172-214^E:1.9e-08`PF13606.5^Ank_3^Ankyrin repeat^173-202^E:3.1e-05`PF13637.5^Ank_4^Ankyrin repeats (many copies)^174-222^E:2.3e-09`PF00023.29^Ank^Ankyrin repeat^174-205^…	.	GO:0005515^molecular_function^protein binding	No	No	No	No
c63114_g1_i2	68.6691	-1.50445	0.419087	-3.58983	0.000330894	0.0223357	IFT88_MOUSE^IFT88_MOUSE^Q:63-2459,H:1-807^65.848%ID^E:0^RecName: Full=Intraflagellar transport protein 88 homolog;^Eukaryota; Metazoa; Chordata; Craniata; Vertebrata; Euteleostomi; Mammalia; Eutheria; Euarchontoglires; Glires; Rodentia; Sciurognathi; Muroidea; Muridae; Murinae; Mus; Mus	PF13176.5^TPR_7^Tetratricopeptide repeat^240-265^E:0.00088`PF00515.27^TPR_1^Tetratricopeptide repeat^241-268^E:1.2e-06`PF13174.5^TPR_6^Tetratricopeptide repeat^241-269^E:0.23`PF08238.11^Sel1^Sel1 repeat^250-265^E:74`PF09976.8^TPR_21^Tetratricopeptide repeat-like domain^406-520^E:5.2e-06`PF00515.27^TPR_1^Tetratricopeptide repeat^489-520^E:1.1e-08`PF07719.16^TPR_2^Tetratricopeptide repeat^489-518^E…	GO:0002080^cellular_component^acrosomal membrane`GO:0097541^cellular_component^axonemal basal plate`GO:0005930^cellular_component^axoneme`GO:0005814^cellular_component^centriole`GO:0005813^cellular_component^centrosome`GO:0036064^cellular_component^ciliary basal body`GO:0097546^cellular_component^ciliary base`GO:0097542^cellular_component^ciliary tip`GO:0005929^cellular_component^cilium`GO:003099…	GO:0005515^molecular_function^protein binding	No	No	Yes	No
c66333_g1_i2	8.52678	-3.18561	0.886789	-3.5923	0.000327769	0.0223357	CD63_MOUSE^CD63_MOUSE^Q:379-1005,H:53-237^26.316%ID^E:7.93e-17^RecName: Full=CD63 antigen;^Eukaryota; Metazoa; Chordata; Craniata; Vertebrata; Euteleostomi; Mammalia; Eutheria; Euarchontoglires; Glires; Rodentia; Sciurognathi; Muroidea; Muridae; Murinae; Mus; Mus	PF00335.19^Tetraspannin^Tetraspanin family^9-267^E:3.7e-40	GO:0009986^cellular_component^cell surface`GO:0031904^cellular_component^endosome lumen`GO:0010008^cellular_component^endosome membrane`GO:0070062^cellular_component^extracellular exosome`GO:0005615^cellular_component^extracellular space`GO:0005887^cellular_component^integral component of plasma membrane`GO:0031226^cellular_component^intrinsic component of plasma membrane`GO:0005770^cellular_comp…	GO:0016021^cellular_component^integral component of membrane	No	No	Yes	No
c73055_g2_i1	28.0337	-3.46608	0.965228	-3.59095	0.000329479	0.0223357	DCLK3_HUMAN^DCLK3_HUMAN^Q:423-1208,H:356-617^64.885%ID^E:4.55e-114^RecName: Full=Serine/threonine-protein kinase DCLK3;^Eukaryota; Metazoa; Chordata; Craniata; Vertebrata; Euteleostomi; Mammalia; Eutheria; Euarchontoglires; Primates; Haplorrhini; Catarrhini; Hominidae; Homo	PF00069.24^Pkinase^Protein kinase domain^118-375^E:2.6e-73`PF07714.16^Pkinase_Tyr^Protein tyrosine kinase^120-333^E:7.3e-36	GO:0005737^cellular_component^cytoplasm`GO:0005634^cellular_component^nucleus`GO:0005524^molecular_function^ATP binding`GO:0004674^molecular_function^protein serine/threonine kinase activity`GO:0035556^biological_process^intracellular signal transduction`GO:1900181^biological_process^negative regulation of protein localization to nucleus`GO:0018105^biological_process^peptidyl-serine phosphorylati…	GO:0004672^molecular_function^protein kinase activity`GO:0005524^molecular_function^ATP binding`GO:0006468^biological_process^protein phosphorylation	No	No	Yes	No
c76106_g1_i2	25.609	-1.84089	0.512883	-3.58929	0.000331576	0.0223357	ADGB_HUMAN^ADGB_HUMAN^Q:2355-4904,H:613-1419^37.386%ID^E:3.82e-158^RecName: Full=Androglobin;^Eukaryota; Metazoa; Chordata; Craniata; Vertebrata; Euteleostomi; Mammalia; Eutheria; Euarchontoglires; Primates; Haplorrhini; Catarrhini; Hominidae; Homo`ADGB_HUMAN^ADGB_HUMAN^Q:96-962,H:1-284^47.635%ID^E:4.56e-65^RecName: Full=Androglobin;^Eukaryota; Metazoa; Chordata; Craniata; Vertebrata; Euteleostom…	PF00648.20^Peptidase_C2^Calpain family cysteine protease^197-254^E:1.2e-07`PF00612.26^IQ^IQ calmodulin-binding motif^1118-1134^E:0.089	GO:0005737^cellular_component^cytoplasm`GO:0004198^molecular_function^calcium-dependent cysteine-type endopeptidase activity`GO:0020037^molecular_function^heme binding`GO:0019825^molecular_function^oxygen binding`GO:0006508^biological_process^proteolysis	GO:0004198^molecular_function^calcium-dependent cysteine-type endopeptidase activity`GO:0006508^biological_process^proteolysis`GO:0005622^cellular_component^intracellular`GO:0005515^molecular_function^protein binding	No	No	No	No
c59457_g1_i1	5.68823	-3.35802	0.93747	-3.582	0.000340975	0.0228453	CC030_HUMAN^CC030_HUMAN^Q:290-418,H:494-536^51.163%ID^E:4.97e-09^RecName: Full=Uncharacterized protein C3orf30;^Eukaryota; Metazoa; Chordata; Craniata; Vertebrata; Euteleostomi; Mammalia; Eutheria; Euarchontoglires; Primates; Haplorrhini; Catarrhini; Hominidae; Homo	.	.	.	No	No	No	No
c58899_g1_i1	7.66711	-3.97457	1.11077	-3.57822	0.000345944	0.0229317	H32_WHEAT^H32_WHEAT^Q:314-565,H:51-134^65.476%ID^E:2.27e-28^RecName: Full=Histone H3.2;^Eukaryota; Viridiplantae; Streptophyta; Embryophyta; Tracheophyta; Spermatophyta; Magnoliophyta; Liliopsida; Poales; Poaceae; BOP clade; Pooideae; Triticodae; Triticeae; Triticinae; Triticum	PF00125.23^Histone^Core histone H2A/H2B/H3/H4^59-148^E:7e-34`PF15511.5^CENP-T_C^Centromere kinetochore component CENP-T histone fold^79-148^E:1.6e-07`PF00808.22^CBFD_NFYB_HMF^Histone-like transcription factor (CBF/NF-Y) and archaeal histone^79-145^E:0.00016	GO:0000786^cellular_component^nucleosome`GO:0005634^cellular_component^nucleus`GO:0003677^molecular_function^DNA binding	GO:0003677^molecular_function^DNA binding	Yes	No	No	No
c76212_g1_i1	110.233	1.8273	0.51053	3.57922	0.00034462	0.0229317	.	.	.	.	No	No	No	No
c70042_g2_i2	34.1269	-2.30236	0.645165	-3.56863	0.000358849	0.0236612	.	.	.	.	No	No	No	No
c63806_g6_i1	9.09364	-1.49443	0.419444	-3.56289	0.000366796	0.024058	SRP14_MOUSE^SRP14_MOUSE^Q:60-326,H:1-91^64.835%ID^E:4.26e-32^RecName: Full=Signal recognition particle 14 kDa protein;^Eukaryota; Metazoa; Chordata; Craniata; Vertebrata; Euteleostomi; Mammalia; Eutheria; Euarchontoglires; Glires; Rodentia; Sciurognathi; Muroidea; Muridae; Murinae; Mus; Mus	PF02290.14^SRP14^Signal recognition particle 14kD protein^4-92^E:5.2e-29	GO:0005786^cellular_component^signal recognition particle, endoplasmic reticulum targeting`GO:0008312^molecular_function^7S RNA binding`GO:0030942^molecular_function^endoplasmic reticulum signal peptide binding`GO:0006614^biological_process^SRP-dependent cotranslational protein targeting to membrane	GO:0008312^molecular_function^7S RNA binding`GO:0030942^molecular_function^endoplasmic reticulum signal peptide binding`GO:0006614^biological_process^SRP-dependent cotranslational protein targeting to membrane`GO:0005786^cellular_component^signal recognition particle, endoplasmic reticulum targeting	No	No	No	No
c117559_g1_i1	19.8376	-6.94342	1.95234	-3.55647	0.000375877	0.0243968	.	.	.	.	No	No	No	No
c67456_g1_i1	15.3925	-2.39126	0.672223	-3.55724	0.000374778	0.0243968	CP100_MACFA^CP100_MACFA^Q:1121-1552,H:379-523^54.483%ID^E:7.94e-50^RecName: Full=Cilia- and flagella-associated protein 100 {ECO:0000305};^Eukaryota; Metazoa; Chordata; Craniata; Vertebrata; Euteleostomi; Mammalia; Eutheria; Euarchontoglires; Primates; Haplorrhini; Catarrhini; Cercopithecidae; Cercopithecinae; Macaca`CP100_MACFA^CP100_MACFA^Q:1617-1805,H:545-607^46.032%ID^E:7.94e-50^RecName: Full…	PF13863.5^DUF4200^Domain of unknown function (DUF4200)^150-267^E:1.2e-34	GO:0097545^cellular_component^axonemal outer doublet`GO:0005737^cellular_component^cytoplasm`GO:0031514^cellular_component^motile cilium`GO:0070840^molecular_function^dynein complex binding`GO:0003341^biological_process^cilium movement`GO:0036159^biological_process^inner dynein arm assembly`GO:2000574^biological_process^regulation of microtubule motor activity	.	No	No	No	No
c63986_g3_i2	10.118	-0.98017	0.275935	-3.55218	0.000382056	0.0246693	TAD3B_XENLA^TAD3B_XENLA^Q:217-1506,H:5-429^51.025%ID^E:1.28e-122^RecName: Full=Transcriptional adapter 3-B;^Eukaryota; Metazoa; Chordata; Craniata; Vertebrata; Euteleostomi; Amphibia; Batrachia; Anura; Pipoidea; Pipidae; Xenopodinae; Xenopus; Xenopus	PF10198.8^Ada3^Histone acetyltransferases subunit 3^323-427^E:4.6e-24	GO:0005634^cellular_component^nucleus`GO:0006355^biological_process^regulation of transcription, DNA-templated`GO:0006351^biological_process^transcription, DNA-templated	.	No	No	No	No
c65717_g2_i2	40.8119	-2.35775	0.664538	-3.54795	0.000388236	0.0249391	.	.	.	.	No	No	No	No
c72030_g1_i1	22.6848	-2.13985	0.603596	-3.54518	0.000392349	0.0250741	.	.	.	.	No	No	No	No
c67815_g1_i1	22.3037	-4.96567	1.40139	-3.54339	0.000395016	0.0251158	CACO2_MOUSE^CACO2_MOUSE^Q:131-520,H:18-145^32.836%ID^E:4.36e-11^RecName: Full=Calcium-binding and coiled-coil domain-containing protein 2 {ECO:0000250|UniProtKB:Q13137};^Eukaryota; Metazoa; Chordata; Craniata; Vertebrata; Euteleostomi; Mammalia; Eutheria; Euarchontoglires; Glires; Rodentia; Sciurognathi; Muroidea; Muridae; Murinae; Mus; Mus	PF07888.10^CALCOCO1^Calcium binding and coiled-coil domain (CALCOCO1) like^20-131^E:2.2e-10	GO:0005776^cellular_component^autophagosome`GO:0000421^cellular_component^autophagosome membrane`GO:0005737^cellular_component^cytoplasm`GO:0031410^cellular_component^cytoplasmic vesicle`GO:0005856^cellular_component^cytoskeleton`GO:0048471^cellular_component^perinuclear region of cytoplasm`GO:0016605^cellular_component^PML body`GO:1901098^biological_process^positive regulation of autophagosome m…	.	No	No	No	No
c49945_g1_i1	8.38816	-3.00466	0.850303	-3.53364	0.000409884	0.0257979	.	.	.	.	No	No	No	No
c77504_g1_i1	15.4164	-1.82852	0.517448	-3.53373	0.000409742	0.0257979	CNTRL_HUMAN^CNTRL_HUMAN^Q:338-2743,H:48-854^36.364%ID^E:2.54e-109^RecName: Full=Centriolin;^Eukaryota; Metazoa; Chordata; Craniata; Vertebrata; Euteleostomi; Mammalia; Eutheria; Euarchontoglires; Primates; Haplorrhini; Catarrhini; Hominidae; Homo`CNTRL_HUMAN^CNTRL_HUMAN^Q:5276-7408,H:1420-2137^28.552%ID^E:3.42e-56^RecName: Full=Centriolin;^Eukaryota; Metazoa; Chordata; Craniata; Vertebrata; Eutel…	PF12799.6^LRR_4^Leucine Rich repeats (2 copies)^128-170^E:6.5e-08`PF12799.6^LRR_4^Leucine Rich repeats (2 copies)^151-187^E:1.1e-07`PF14580.5^LRR_9^Leucine-rich repeat^154-282^E:8.2e-21`PF13855.5^LRR_8^Leucine rich repeat^172-232^E:7e-08	GO:0005813^cellular_component^centrosome`GO:0005829^cellular_component^cytosol`GO:0016020^cellular_component^membrane`GO:0097431^cellular_component^mitotic spindle pole`GO:0048471^cellular_component^perinuclear region of cytoplasm`GO:0035904^biological_process^aorta development`GO:0003279^biological_process^cardiac septum development`GO:0051301^biological_process^cell division`GO:0060976^biologic…	GO:0005515^molecular_function^protein binding	No	No	No	No
c59724_g1_i1	16.0927	-5.6442	1.59799	-3.53207	0.000412327	0.0258212	.	PF15073.5^DUF4540^Domain of unknown function (DUF4540)^253-321^E:6.4e-06	.	.	No	No	No	No
c74354_g1_i2	50.6208	-0.590504	0.167287	-3.52989	0.000415726	0.0259039	UBP5_MOUSE^UBP5_MOUSE^Q:98-1543,H:3-496^57.916%ID^E:0^RecName: Full=Ubiquitin carboxyl-terminal hydrolase 5;^Eukaryota; Metazoa; Chordata; Craniata; Vertebrata; Euteleostomi; Mammalia; Eutheria; Euarchontoglires; Glires; Rodentia; Sciurognathi; Muroidea; Muridae; Murinae; Mus; Mus`UBP5_MOUSE^UBP5_MOUSE^Q:1605-2501,H:515-856^47.368%ID^E:0^RecName: Full=Ubiquitin carboxyl-terminal hydrolase 5;^Euka…	PF02148.18^zf-UBP^Zn-finger in ubiquitin-hydrolases and other protein^189-260^E:1.2e-15`PF00443.28^UCH^Ubiquitin carboxyl-terminal hydrolase^316-453^E:5.5e-21	GO:0004843^molecular_function^thiol-dependent ubiquitin-specific protease activity`GO:0043130^molecular_function^ubiquitin binding`GO:0008270^molecular_function^zinc ion binding`GO:0032436^biological_process^positive regulation of proteasomal ubiquitin-dependent protein catabolic process`GO:0016579^biological_process^protein deubiquitination`GO:0071108^biological_process^protein K48-linked deubiq…	GO:0008270^molecular_function^zinc ion binding`GO:0036459^molecular_function^thiol-dependent ubiquitinyl hydrolase activity`GO:0016579^biological_process^protein deubiquitination	No	No	No	No
c11199_g1_i1	39.2239	-1.94854	0.552426	-3.52724	0.000419914	0.0260285	.	.	.	.	No	No	No	No
c66138_g3_i1	25.6966	-2.45437	0.696148	-3.52564	0.000422453	0.0260285	.	.	.	.	No	No	No	No
c68907_g2_i2	44.5782	-4.63524	1.31508	-3.52468	0.000423992	0.0260285	.	.	.	.	No	No	No	No
c73249_g1_i1	5.35399	1.29273	0.366985	3.52256	0.000427405	0.0261094	.	.	.	.	No	No	No	No
c58942_g1_i1	7.31986	-1.83184	0.520317	-3.52062	0.000430541	0.0261727	F227B_HUMAN^F227B_HUMAN^Q:153-1667,H:1-438^30.409%ID^E:5.06e-53^RecName: Full=Protein FAM227B;^Eukaryota; Metazoa; Chordata; Craniata; Vertebrata; Euteleostomi; Mammalia; Eutheria; Euarchontoglires; Primates; Haplorrhini; Catarrhini; Hominidae; Homo	PF14922.5^FWWh^Protein of unknown function^186-330^E:1.6e-48	.	.	No	No	No	No
c72336_g1_i2	7.14733	2.26442	0.643621	3.51825	0.000434407	0.0262795	.	.	.	.	No	No	No	No
c34316_g1_i2	5.63405	-4.30449	1.22452	-3.51526	0.000439326	0.0264487	.	.	.	.	No	No	No	No
c69498_g2_i1	10.8756	-1.92908	0.550055	-3.50708	0.000453061	0.0270575	.	.	.	.	No	No	No	No
c73497_g5_i4	6.48187	-1.48372	0.423117	-3.50665	0.000453781	0.0270575	AMN1_PONAB^AMN1_PONAB^Q:146-394,H:178-258^63.855%ID^E:3.85e-27^RecName: Full=Protein AMN1 homolog;^Eukaryota; Metazoa; Chordata; Craniata; Vertebrata; Euteleostomi; Mammalia; Eutheria; Euarchontoglires; Primates; Haplorrhini; Catarrhini; Hominidae; Pongo	.	.	.	No	No	No	No
c77403_g3_i1	15.843	-2.94584	0.840782	-3.50369	0.000458865	0.0272304	HMCN1_HUMAN^HMCN1_HUMAN^Q:67-1686,H:3916-4407^25.59%ID^E:3.27e-28^RecName: Full=Hemicentin-1;^Eukaryota; Metazoa; Chordata; Craniata; Vertebrata; Euteleostomi; Mammalia; Eutheria; Euarchontoglires; Primates; Haplorrhini; Catarrhini; Hominidae; Homo`HMCN1_HUMAN^HMCN1_HUMAN^Q:7-1692,H:889-1431^25.801%ID^E:1.54e-26^RecName: Full=Hemicentin-1;^Eukaryota; Metazoa; Chordata; Craniata; Vertebrata; Eutel…	PF13927.5^Ig_3^Immunoglobulin domain^4-88^E:4.8e-11`PF00047.24^ig^Immunoglobulin domain^9-90^E:5.6e-09`PF07679.15^I-set^Immunoglobulin I-set domain^14-100^E:5.4e-09`PF07686.16^V-set^Immunoglobulin V-set domain^17-92^E:1.2e-09`PF13927.5^Ig_3^Immunoglobulin domain^106-190^E:3e-10`PF07679.15^I-set^Immunoglobulin I-set domain^106-202^E:3.5e-10`PF00047.24^ig^Immunoglobulin domain^111-196^E:7.6e-08`PF0…	GO:0005604^cellular_component^basement membrane`GO:0005938^cellular_component^cell cortex`GO:0030054^cellular_component^cell junction`GO:0032154^cellular_component^cleavage furrow`GO:0005509^molecular_function^calcium ion binding`GO:0030335^biological_process^positive regulation of cell migration`GO:0050896^biological_process^response to stimulus`GO:0006939^biological_process^smooth muscle contra…	GO:0005515^molecular_function^protein binding	No	No	No	No
c67143_g1_i1	81.5018	-1.19289	0.3412	-3.49615	0.000472024	0.0278785	IFT81_RAT^IFT81_RAT^Q:55-2091,H:1-675^56.433%ID^E:0^RecName: Full=Intraflagellar transport protein 81 homolog;^Eukaryota; Metazoa; Chordata; Craniata; Vertebrata; Euteleostomi; Mammalia; Eutheria; Euarchontoglires; Glires; Rodentia; Sciurognathi; Muroidea; Muridae; Murinae; Rattus	.	GO:0005813^cellular_component^centrosome`GO:0005929^cellular_component^cilium`GO:0030992^cellular_component^intraciliary transport particle B`GO:0015631^molecular_function^tubulin binding`GO:0060271^biological_process^cilium assembly`GO:0042073^biological_process^intraciliary transport`GO:0035735^biological_process^intraciliary transport involved in cilium assembly`GO:0007283^biological_process^s…	.	No	No	No	No
c67849_g1_i1	14.2072	1.57758	0.451404	3.49484	0.000474355	0.027884	.	.	.	.	No	Yes	No	No
c47883_g1_i1	102.096	-5.00566	1.43367	-3.4915	0.000480313	0.0281017	.	.	.	.	No	No	No	No
c73368_g2_i1	14.384	-3.58333	1.02676	-3.48994	0.000483126	0.0281342	TBC30_XENTR^TBC30_XENTR^Q:588-2390,H:82-699^47.293%ID^E:7.63e-176^RecName: Full=TBC1 domain family member 30;^Eukaryota; Metazoa; Chordata; Craniata; Vertebrata; Euteleostomi; Amphibia; Batrachia; Anura; Pipoidea; Pipidae; Xenopodinae; Xenopus; Silurana	PF00566.17^RabGAP-TBC^Rab-GTPase-TBC domain^204-427^E:1.7e-35`PF15733.4^DUF4682^Domain of unknown function (DUF4682)^580-656^E:3.9e-13	GO:0012505^cellular_component^endomembrane system`GO:0005622^cellular_component^intracellular`GO:0005096^molecular_function^GTPase activator activity`GO:0017137^molecular_function^Rab GTPase binding`GO:0090630^biological_process^activation of GTPase activity`GO:0006886^biological_process^intracellular protein transport`GO:0031338^biological_process^regulation of vesicle fusion	.	No	No	No	No
c54052_g1_i1	5.57467	-2.3763	0.682895	-3.47974	0.000501895	0.0290276	CFA47_HUMAN^CFA47_HUMAN^Q:1-2349,H:369-1152^36.352%ID^E:2.32e-147^RecName: Full=Cilia- and flagella-associated protein 47 {ECO:0000305};^Eukaryota; Metazoa; Chordata; Craniata; Vertebrata; Euteleostomi; Mammalia; Eutheria; Euarchontoglires; Primates; Haplorrhini; Catarrhini; Hominidae; Homo	.	.	.	No	No	No	No
c76961_g2_i8	5.37996	-1.76258	0.506623	-3.47909	0.000503127	0.0290276	.	.	.	.	No	No	No	No
c59902_g1_i1	4.98213	-1.5393	0.443002	-3.4747	0.000511431	0.0293708	OXSM_HUMAN^OXSM_HUMAN^Q:555-1433,H:167-456^63.481%ID^E:1.8e-119^RecName: Full=3-oxoacyl-[acyl-carrier-protein] synthase, mitochondrial;^Eukaryota; Metazoa; Chordata; Craniata; Vertebrata; Euteleostomi; Mammalia; Eutheria; Euarchontoglires; Primates; Haplorrhini; Catarrhini; Hominidae; Homo`OXSM_HUMAN^OXSM_HUMAN^Q:26-577,H:6-174^36.559%ID^E:1.8e-119^RecName: Full=3-oxoacyl-[acyl-carrier-protein] s…	PF00109.25^ketoacyl-synt^Beta-ketoacyl synthase, N-terminal domain^4-114^E:4.3e-35`PF02801.21^Ketoacyl-synt_C^Beta-ketoacyl synthase, C-terminal domain^122-236^E:1.3e-34	GO:0005829^cellular_component^cytosol`GO:0005739^cellular_component^mitochondrion`GO:0004315^molecular_function^3-oxoacyl-[acyl-carrier-protein] synthase activity`GO:0006637^biological_process^acyl-CoA metabolic process`GO:0051792^biological_process^medium-chain fatty acid biosynthetic process`GO:0051790^biological_process^short-chain fatty acid biosynthetic process	.	No	No	No	No
c75973_g4_i1	35.9354	-2.27323	0.655349	-3.46873	0.000522927	0.0298932	CCD39_XENTR^CCD39_XENTR^Q:102-2723,H:2-874^56.979%ID^E:0^RecName: Full=Coiled-coil domain-containing protein 39;^Eukaryota; Metazoa; Chordata; Craniata; Vertebrata; Euteleostomi; Amphibia; Batrachia; Anura; Pipoidea; Pipidae; Xenopodinae; Xenopus; Silurana	.	GO:0005930^cellular_component^axoneme`GO:0005737^cellular_component^cytoplasm`GO:0070286^biological_process^axonemal dynein complex assembly`GO:0003341^biological_process^cilium movement`GO:0060285^biological_process^cilium-dependent cell motility`GO:0060287^biological_process^epithelial cilium movement involved in determination of left/right asymmetry`GO:0036159^biological_process^inner dynein a…	.	No	No	No	No
c59945_g1_i1	23.9685	-0.948774	0.273697	-3.46651	0.000527267	0.0300037	NDUV1_BOVIN^NDUV1_BOVIN^Q:139-1380,H:29-442^85.266%ID^E:0^RecName: Full=NADH dehydrogenase [ubiquinone] flavoprotein 1, mitochondrial;^Eukaryota; Metazoa; Chordata; Craniata; Vertebrata; Euteleostomi; Mammalia; Eutheria; Laurasiatheria; Cetartiodactyla; Ruminantia; Pecora; Bovidae; Bovinae; Bos	PF01512.16^Complex1_51K^Respiratory-chain NADH dehydrogenase 51 Kd subunit^98-268^E:6.3e-50`PF10531.8^SLBB^SLBB domain^295-344^E:2e-06`PF10589.8^NADH_4Fe-4S^NADH-ubiquinone oxidoreductase-F iron-sulfur binding region^385-466^E:9.9e-30	GO:0005829^cellular_component^cytosol`GO:0005747^cellular_component^mitochondrial respiratory chain complex I`GO:0051539^molecular_function^4 iron, 4 sulfur cluster binding`GO:0010181^molecular_function^FMN binding`GO:0046872^molecular_function^metal ion binding`GO:0051287^molecular_function^NAD binding`GO:0008137^molecular_function^NADH dehydrogenase (ubiquinone) activity	GO:0051539^molecular_function^4 iron, 4 sulfur cluster binding	No	No	No	No
c59536_g2_i1	22.1996	-2.00234	0.578474	-3.46142	0.00053733	0.0304373	CA228_BOVIN^CA228_BOVIN^Q:295-1506,H:1-405^57.284%ID^E:4.11e-168^RecName: Full=Uncharacterized protein C1orf228 homolog;^Eukaryota; Metazoa; Chordata; Craniata; Vertebrata; Euteleostomi; Mammalia; Eutheria; Laurasiatheria; Cetartiodactyla; Ruminantia; Pecora; Bovidae; Bovinae; Bos	.	.	.	No	No	No	No
c49287_g1_i1	12.9055	-1.35911	0.392806	-3.46	0.000540175	0.03046	.	.	.	.	No	No	No	No
c58539_g1_i1	18.462	-1.67865	0.485506	-3.45752	0.00054517	0.0306032	TCTE1_MACFA^TCTE1_MACFA^Q:322-1656,H:40-482^52.135%ID^E:1.45e-146^RecName: Full=T-complex-associated testis-expressed protein 1;^Eukaryota; Metazoa; Chordata; Craniata; Vertebrata; Euteleostomi; Mammalia; Eutheria; Euarchontoglires; Primates; Haplorrhini; Catarrhini; Cercopithecidae; Cercopithecinae; Macaca	PF13516.5^LRR_6^Leucine Rich repeat^328-346^E:0.00059`PF13516.5^LRR_6^Leucine Rich repeat^354-376^E:0.62`PF13516.5^LRR_6^Leucine Rich repeat^381-404^E:6.6e-06`PF13516.5^LRR_6^Leucine Rich repeat^409-424^E:1.8`PF13516.5^LRR_6^Leucine Rich repeat^437-459^E:1.5e-05	.	GO:0005515^molecular_function^protein binding	No	No	No	No
c53363_g1_i1	119.826	-2.68409	0.776971	-3.45456	0.000551201	0.0306655	WFD18_RAT^WFD18_RAT^Q:118-315,H:3-73^43.662%ID^E:7.73e-10^RecName: Full=WAP four-disulfide core domain protein 18;^Eukaryota; Metazoa; Chordata; Craniata; Vertebrata; Euteleostomi; Mammalia; Eutheria; Euarchontoglires; Glires; Rodentia; Sciurognathi; Muroidea; Muridae; Murinae; Rattus	.	GO:0005576^cellular_component^extracellular region`GO:0030414^molecular_function^peptidase inhibitor activity	.	No	No	No	No
c69328_g1_i2	11.1648	-2.84461	0.823302	-3.45512	0.000550039	0.0306655	CCD81_HUMAN^CCD81_HUMAN^Q:172-747,H:22-213^52.083%ID^E:1.64e-63^RecName: Full=Coiled-coil domain-containing protein 81;^Eukaryota; Metazoa; Chordata; Craniata; Vertebrata; Euteleostomi; Mammalia; Eutheria; Euarchontoglires; Primates; Haplorrhini; Catarrhini; Hominidae; Homo`CCD81_HUMAN^CCD81_HUMAN^Q:1312-1938,H:285-491^44.55%ID^E:1.08e-35^RecName: Full=Coiled-coil domain-containing protein 81;^Eu…	PF14908.5^DUF4496^Domain of unknown function (DUF4496)^31-166^E:9.9e-45	GO:0005813^cellular_component^centrosome`GO:0005737^cellular_component^cytoplasm	.	No	No	No	No
c52739_g1_i2	22.4827	-1.22936	0.356042	-3.45285	0.000554693	0.0307226	.	.	.	.	No	No	No	No
c46160_g1_i1	5.08849	-2.24012	0.649252	-3.4503	0.000559959	0.030877	.	.	.	.	No	No	No	No
c77023_g2_i1	45.9956	-2.24946	0.653759	-3.44081	0.00057997	0.0318396	.	.	.	.	No	No	No	No
c42165_g1_i1	62.4824	-5.36429	1.56121	-3.43598	0.000590423	0.031878	.	PF14625.5^Lustrin_cystein^Lustrin, cysteine-rich repeated domain^54-98^E:0.00022`PF14625.5^Lustrin_cystein^Lustrin, cysteine-rich repeated domain^103-139^E:0.0042`PF14625.5^Lustrin_cystein^Lustrin, cysteine-rich repeated domain^144-187^E:0.00037	.	.	Yes	No	No	No
c54629_g1_i1	14.5209	-4.51289	1.31395	-3.43459	0.000593461	0.031878	.	.	.	.	No	No	No	No
c68222_g3_i1	12.3015	-5.53593	1.61063	-3.43712	0.000587925	0.031878	CNBD2_MACFA^CNBD2_MACFA^Q:1490-2212,H:70-304^26.613%ID^E:4.1e-19^RecName: Full=Cyclic nucleotide-binding domain-containing protein 2;^Eukaryota; Metazoa; Chordata; Craniata; Vertebrata; Euteleostomi; Mammalia; Eutheria; Euarchontoglires; Primates; Haplorrhini; Catarrhini; Cercopithecidae; Cercopithecinae; Macaca	PF00027.28^cNMP_binding^Cyclic nucleotide-binding domain^527-618^E:4e-16	GO:0005829^cellular_component^cytosol`GO:0030552^molecular_function^cAMP binding`GO:0007283^biological_process^spermatogenesis	.	No	No	No	No
c72695_g1_i2	7.37986	-1.71351	0.498736	-3.43571	0.000591014	0.031878	.	.	.	.	No	No	No	No
c77333_g9_i1	7.86451	0.916344	0.266765	3.43502	0.000592512	0.031878	.	.	.	.	No	No	No	No
c58003_g1_i1	5.29559	-2.94935	0.860307	-3.42826	0.000607471	0.0324906	FXJ1B_DANRE^FXJ1B_DANRE^Q:739-1704,H:1-355^40.327%ID^E:1.2e-61^RecName: Full=Forkhead box protein J1-B {ECO:0000305};^Eukaryota; Metazoa; Chordata; Craniata; Vertebrata; Euteleostomi; Actinopterygii; Neopterygii; Teleostei; Ostariophysi; Cypriniformes; Cyprinidae; Danio	PF00250.17^Forkhead^Forkhead domain^126-210^E:1.4e-37	GO:0005634^cellular_component^nucleus`GO:0000981^molecular_function^RNA polymerase II transcription factor activity, sequence-specific DNA binding`GO:0043565^molecular_function^sequence-specific DNA binding`GO:0060088^biological_process^auditory receptor cell stereocilium organization`GO:0060271^biological_process^cilium assembly`GO:0007368^biological_process^determination of left/right symmetry`…	GO:0003700^molecular_function^transcription factor activity, sequence-specific DNA binding`GO:0043565^molecular_function^sequence-specific DNA binding`GO:0006355^biological_process^regulation of transcription, DNA-templated	No	No	No	Yes
c65840_g1_i1	88.4039	-3.83698	1.1199	-3.42618	0.000612129	0.0325932	.	.	.	.	No	No	No	No
c67428_g1_i1	24.888	-4.46761	1.30438	-3.42508	0.00061462	0.0325932	.	.	.	.	No	No	No	No
c72421_g1_i3	17.1963	-1.66088	0.48511	-3.42371	0.000617718	0.0326187	SPAT1_RAT^SPAT1_RAT^Q:1845-2231,H:301-429^39.706%ID^E:1.95e-19^RecName: Full=Spermatogenesis-associated protein 1;^Eukaryota; Metazoa; Chordata; Craniata; Vertebrata; Euteleostomi; Mammalia; Eutheria; Euarchontoglires; Glires; Rodentia; Sciurognathi; Muroidea; Muridae; Murinae; Rattus	PF15743.4^SPATA1_C^Spermatogenesis-associated C-terminus^355-503^E:1.9e-40	.	.	No	No	No	No
c65702_g7_i1	12.4057	-2.16531	0.632694	-3.42236	0.000620799	0.032643	.	.	.	.	No	No	No	No
c76754_g4_i2	14.2503	-2.63204	0.770723	-3.41502	0.000637763	0.0333941	ERIP6_HUMAN^ERIP6_HUMAN^Q:778-1908,H:271-628^32.234%ID^E:1.03e-42^RecName: Full=Glutamate-rich protein 6;^Eukaryota; Metazoa; Chordata; Craniata; Vertebrata; Euteleostomi; Mammalia; Eutheria; Euarchontoglires; Primates; Haplorrhini; Catarrhini; Hominidae; Homo	PF14977.5^FAM194^FAM194 protein^414-611^E:1.7e-68	.	.	No	No	No	No
c52175_g1_i1	18.7467	-2.15473	0.631462	-3.41229	0.00064419	0.0335895	SPAG8_MOUSE^SPAG8_MOUSE^Q:134-688,H:263-444^41.622%ID^E:4.78e-32^RecName: Full=Sperm-associated antigen 8 {ECO:0000312|MGI:MGI:3056295};^Eukaryota; Metazoa; Chordata; Craniata; Vertebrata; Euteleostomi; Mammalia; Eutheria; Euarchontoglires; Glires; Rodentia; Sciurognathi; Muroidea; Muridae; Murinae; Mus; Mus	.	GO:0001669^cellular_component^acrosomal vesicle`GO:0005737^cellular_component^cytoplasm`GO:0005634^cellular_component^nucleus`GO:0005819^cellular_component^spindle`GO:0007049^biological_process^cell cycle`GO:0030154^biological_process^cell differentiation`GO:0032092^biological_process^positive regulation of protein binding`GO:0045944^biological_process^positive regulation of transcription from RN…	.	No	No	No	No
c48984_g1_i1	15.8704	-5.34853	1.56848	-3.41	0.000649632	0.0337321	.	.	.	.	No	No	No	No
c124437_g1_i1	33.011	0.747847	0.21964	3.40488	0.000661927	0.0341065	.	.	.	.	No	No	No	No
c75401_g1_i1	14.5475	-2.27849	0.669215	-3.40472	0.000662315	0.0341065	ANXA6_BOVIN^ANXA6_BOVIN^Q:1-1896,H:41-668^45.086%ID^E:8.99e-168^RecName: Full=Annexin A6;^Eukaryota; Metazoa; Chordata; Craniata; Vertebrata; Euteleostomi; Mammalia; Eutheria; Laurasiatheria; Cetartiodactyla; Ruminantia; Pecora; Bovidae; Bovinae; Bos`ANXA6_BOVIN^ANXA6_BOVIN^Q:991-1896,H:19-320^49.007%ID^E:2.32e-83^RecName: Full=Annexin A6;^Eukaryota; Metazoa; Chordata; Craniata; Vertebrata; Eutel…	PF00191.19^Annexin^Annexin^2-46^E:2.1e-13`PF00191.19^Annexin^Annexin^56-121^E:2.9e-27`PF00191.19^Annexin^Annexin^139-202^E:6e-21`PF00191.19^Annexin^Annexin^216-280^E:1.1e-19`PF00191.19^Annexin^Annexin^337-396^E:4.8e-19`PF00191.19^Annexin^Annexin^408-473^E:2.4e-22`PF00191.19^Annexin^Annexin^491-556^E:3.8e-22`PF00191.19^Annexin^Annexin^568-632^E:5.4e-19	GO:0042584^cellular_component^chromaffin granule membrane`GO:0005737^cellular_component^cytoplasm`GO:0005829^cellular_component^cytosol`GO:0070062^cellular_component^extracellular exosome`GO:0005925^cellular_component^focal adhesion`GO:0016021^cellular_component^integral component of membrane`GO:0031902^cellular_component^late endosome membrane`GO:0005765^cellular_component^lysosomal membrane`GO:…	GO:0005509^molecular_function^calcium ion binding`GO:0005544^molecular_function^calcium-dependent phospholipid binding	No	No	Yes	No
c73373_g1_i1	48.7358	-1.05797	0.311229	-3.39934	0.00067548	0.0346413	CE164_HUMAN^CE164_HUMAN^Q:142-432,H:6-102^67.01%ID^E:4.66e-39^RecName: Full=Centrosomal protein of 164 kDa;^Eukaryota; Metazoa; Chordata; Craniata; Vertebrata; Euteleostomi; Mammalia; Eutheria; Euarchontoglires; Primates; Haplorrhini; Catarrhini; Hominidae; Homo	PF00397.25^WW^WW domain^53-82^E:5.9e-08	GO:0005814^cellular_component^centriole`GO:0005813^cellular_component^centrosome`GO:0097539^cellular_component^ciliary transition fiber`GO:0005829^cellular_component^cytosol`GO:0005615^cellular_component^extracellular space`GO:0016607^cellular_component^nuclear speck`GO:0005654^cellular_component^nucleoplasm`GO:0051301^biological_process^cell division`GO:0097711^biological_process^ciliary basal b…	GO:0005515^molecular_function^protein binding	No	No	No	No
c72486_g1_i5	15.2229	-1.84548	0.543313	-3.39672	0.000681993	0.034832	DYH7_RAT^DYH7_RAT^Q:2-6937,H:1736-4057^60.172%ID^E:0^RecName: Full=Dynein heavy chain 7, axonemal;^Eukaryota; Metazoa; Chordata; Craniata; Vertebrata; Euteleostomi; Mammalia; Eutheria; Euarchontoglires; Glires; Rodentia; Sciurognathi; Muroidea; Muridae; Murinae; Rattus	PF12775.6^AAA_7^P-loop containing dynein motor region D3^230-494^E:3.8e-53`PF07728.13^AAA_5^AAA domain (dynein-related subfamily)^256-390^E:9.4e-06`PF12780.6^AAA_8^P-loop containing dynein motor region D4^595-859^E:4.7e-68`PF12777.6^MT^Microtubule-binding stalk of dynein motor^874-1214^E:8e-49`PF12781.6^AAA_9^ATP-binding dynein motor region D5^1247-1467^E:1.5e-92`PF03028.14^Dynein_heavy^Dynein he…	GO:0005929^cellular_component^cilium`GO:0005737^cellular_component^cytoplasm`GO:0030286^cellular_component^dynein complex`GO:0005874^cellular_component^microtubule`GO:0005524^molecular_function^ATP binding`GO:0005509^molecular_function^calcium ion binding`GO:0003777^molecular_function^microtubule motor activity`GO:0007018^biological_process^microtubule-based movement	GO:0005524^molecular_function^ATP binding`GO:0016887^molecular_function^ATPase activity`GO:0003777^molecular_function^microtubule motor activity`GO:0007018^biological_process^microtubule-based movement`GO:0030286^cellular_component^dynein complex	No	No	No	No
c55080_g1_i2	25.6733	2.30297	0.678678	3.39332	0.000690507	0.0351229	.	.	.	.	No	No	No	No
c75642_g1_i1	15.5459	-1.27241	0.375166	-3.39159	0.000694887	0.035202	CE162_HUMAN^CE162_HUMAN^Q:2363-4606,H:659-1392^37.335%ID^E:1.14e-99^RecName: Full=Centrosomal protein of 162 kDa;^Eukaryota; Metazoa; Chordata; Craniata; Vertebrata; Euteleostomi; Mammalia; Eutheria; Euarchontoglires; Primates; Haplorrhini; Catarrhini; Hominidae; Homo	.	GO:0005879^cellular_component^axonemal microtubule`GO:0005814^cellular_component^centriole`GO:0005634^cellular_component^nucleus`GO:0005819^cellular_component^spindle`GO:0060271^biological_process^cilium assembly	.	No	No	No	No
c56778_g1_i1	52.2957	-3.9135	1.15471	-3.38918	0.000701022	0.035369	CCD63_BOVIN^CCD63_BOVIN^Q:512-1774,H:116-529^32.311%ID^E:1.71e-55^RecName: Full=Coiled-coil domain-containing protein 63 {ECO:0000250|UniProtKB:Q8NA47};^Eukaryota; Metazoa; Chordata; Craniata; Vertebrata; Euteleostomi; Mammalia; Eutheria; Laurasiatheria; Cetartiodactyla; Ruminantia; Pecora; Bovidae; Bovinae; Bos	.	GO:0005930^cellular_component^axoneme`GO:0003341^biological_process^cilium movement`GO:0036158^biological_process^outer dynein arm assembly`GO:0007286^biological_process^spermatid development	.	No	No	No	No
c72382_g1_i1	23.5852	1.73708	0.512873	3.38696	0.000706717	0.0355125	.	.	.	.	No	Yes	No	No
c59128_g1_i1	9.70503	-1.48682	0.439832	-3.38042	0.000723746	0.0360773	.	.	.	.	No	No	No	No
c75828_g1_i1	15.9416	-3.01396	0.891378	-3.38123	0.000721617	0.0360773	PKHL1_MOUSE^PKHL1_MOUSE^Q:2-5914,H:2243-4186^41.733%ID^E:0^RecName: Full=Fibrocystin-L;^Eukaryota; Metazoa; Chordata; Craniata; Vertebrata; Euteleostomi; Mammalia; Eutheria; Euarchontoglires; Glires; Rodentia; Sciurognathi; Muroidea; Muridae; Murinae; Mus; Mus`PKHL1_MOUSE^PKHL1_MOUSE^Q:2369-3409,H:2176-2525^31.496%ID^E:3.25e-32^RecName: Full=Fibrocystin-L;^Eukaryota; Metazoa; Chordata; Craniata; …	PF10162.8^G8^G8 domain^1-60^E:4.1e-15`PF10162.8^G8^G8 domain^810-937^E:4.6e-26`PF13229.5^Beta_helix^Right handed beta helix region^1099-1267^E:4.3e-08	GO:0005929^cellular_component^cilium`GO:0016021^cellular_component^integral component of membrane	.	No	No	No	No
c59967_g1_i1	10.4661	-2.61233	0.773597	-3.37686	0.000733179	0.0364019	AKA14_RAT^AKA14_RAT^Q:257-673,H:361-499^43.972%ID^E:8.41e-33^RecName: Full=A-kinase anchor protein 14;^Eukaryota; Metazoa; Chordata; Craniata; Vertebrata; Euteleostomi; Mammalia; Eutheria; Euarchontoglires; Glires; Rodentia; Sciurognathi; Muroidea; Muridae; Murinae; Rattus	PF14469.5^AKAP28^28 kDa A-kinase anchor^66-186^E:3.6e-53	GO:0005737^cellular_component^cytoplasm`GO:0035686^cellular_component^sperm fibrous sheath`GO:0051018^molecular_function^protein kinase A binding`GO:0007283^biological_process^spermatogenesis	.	No	No	No	No
c65479_g1_i1	5.43128	-1.89087	0.560235	-3.37513	0.000737804	0.0364861	HAUS1_BOVIN^HAUS1_BOVIN^Q:160-981,H:4-278^34.892%ID^E:6.72e-41^RecName: Full=HAUS augmin-like complex subunit 1;^Eukaryota; Metazoa; Chordata; Craniata; Vertebrata; Euteleostomi; Mammalia; Eutheria; Laurasiatheria; Cetartiodactyla; Ruminantia; Pecora; Bovidae; Bovinae; Bos	.	GO:0005813^cellular_component^centrosome`GO:0005829^cellular_component^cytosol`GO:0070652^cellular_component^HAUS complex`GO:0005874^cellular_component^microtubule`GO:0000922^cellular_component^spindle pole`GO:0051301^biological_process^cell division`GO:0051297^biological_process^centrosome organization`GO:0007067^biological_process^mitotic nuclear division`GO:0051225^biological_process^spindle a…	.	No	No	No	No
c11339_g1_i1	22.7601	-4.7538	1.41101	-3.36907	0.000754212	0.0371502	SIK2_MOUSE^SIK2_MOUSE^Q:282-977,H:40-271^45.064%ID^E:3.58e-56^RecName: Full=Serine/threonine-protein kinase SIK2;^Eukaryota; Metazoa; Chordata; Craniata; Vertebrata; Euteleostomi; Mammalia; Eutheria; Euarchontoglires; Glires; Rodentia; Sciurognathi; Muroidea; Muridae; Murinae; Mus; Mus	PF00069.24^Pkinase^Protein kinase domain^42-291^E:8.9e-66`PF07714.16^Pkinase_Tyr^Protein tyrosine kinase^42-287^E:4e-35`PF06293.13^Kdo^Lipopolysaccharide kinase (Kdo/WaaP) family^123-183^E:0.00014`PF12330.7^Haspin_kinase^Haspin like kinase domain^136-192^E:3.1e-06`PF14531.5^Kinase-like^Kinase-like^140-279^E:4.1e-14	GO:0005737^cellular_component^cytoplasm`GO:0005634^cellular_component^nucleus`GO:0005524^molecular_function^ATP binding`GO:0000287^molecular_function^magnesium ion binding`GO:0004674^molecular_function^protein serine/threonine kinase activity`GO:0008286^biological_process^insulin receptor signaling pathway`GO:0035556^biological_process^intracellular signal transduction`GO:0046777^biological_proce…	GO:0004672^molecular_function^protein kinase activity`GO:0005524^molecular_function^ATP binding`GO:0006468^biological_process^protein phosphorylation`GO:0016773^molecular_function^phosphotransferase activity, alcohol group as acceptor`GO:0016020^cellular_component^membrane	No	No	Yes	No
c59397_g2_i2	28.6716	-5.7383	1.71055	-3.35465	0.000794641	0.0389875	.	.	.	.	No	No	No	No
c71633_g3_i1	12.7231	-2.67066	0.796665	-3.3523	0.000801435	0.0391666	.	.	.	.	No	No	No	No
c12889_g1_i1	9.86685	-2.19219	0.654172	-3.3511	0.000804926	0.0391835	.	.	.	.	No	No	No	No
c62438_g2_i1	6.00932	-2.10261	0.62773	-3.34955	0.000809424	0.0392093	.	.	.	.	No	No	No	No
c66072_g3_i1	12.8906	-2.44142	0.729203	-3.34806	0.00081379	0.0392093	.	.	.	.	No	No	No	No
c75294_g3_i2	47.6086	-0.589831	0.176191	-3.34769	0.000814893	0.0392093	MAON_MOUSE^MAON_MOUSE^Q:261-1916,H:47-597^60.398%ID^E:0^RecName: Full=NADP-dependent malic enzyme, mitochondrial;^Eukaryota; Metazoa; Chordata; Craniata; Vertebrata; Euteleostomi; Mammalia; Eutheria; Euarchontoglires; Glires; Rodentia; Sciurognathi; Muroidea; Muridae; Murinae; Mus; Mus	PF00390.18^malic^Malic enzyme, N-terminal domain^124-304^E:1.9e-78`PF03949.14^Malic_M^Malic enzyme, NAD binding domain^314-566^E:1.1e-95	GO:0005759^cellular_component^mitochondrial matrix`GO:0005739^cellular_component^mitochondrion`GO:0004471^molecular_function^malate dehydrogenase (decarboxylating) (NAD+) activity`GO:0004473^molecular_function^malate dehydrogenase (decarboxylating) (NADP+) activity`GO:0004470^molecular_function^malic enzyme activity`GO:0046872^molecular_function^metal ion binding`GO:0051287^molecular_function^NAD…	GO:0004471^molecular_function^malate dehydrogenase (decarboxylating) (NAD+) activity`GO:0055114^biological_process^oxidation-reduction process`GO:0051287^molecular_function^NAD binding	No	No	No	No
c64125_g1_i1	22.4358	-1.42781	0.426941	-3.34428	0.000824968	0.0395413	CU059_DANRE^CU059_DANRE^Q:159-1028,H:1-290^64.483%ID^E:2.59e-139^RecName: Full=UPF0769 protein C21orf59 homolog;^Eukaryota; Metazoa; Chordata; Craniata; Vertebrata; Euteleostomi; Actinopterygii; Neopterygii; Teleostei; Ostariophysi; Cypriniformes; Cyprinidae; Danio	PF11069.7^DUF2870^Protein of unknown function (DUF2870)^189-285^E:1.6e-45	GO:0005737^cellular_component^cytoplasm`GO:0048858^biological_process^cell projection morphogenesis`GO:0090660^biological_process^cerebrospinal fluid circulation`GO:0060271^biological_process^cilium assembly`GO:0007368^biological_process^determination of left/right symmetry`GO:0044458^biological_process^motile cilium assembly`GO:0048793^biological_process^pronephros development`GO:0072114^biologi…	.	No	No	No	No
c52426_g1_i1	32.8867	-4.7466	1.41979	-3.34317	0.000828262	0.0395471	.	.	.	.	No	No	No	No
c41378_g1_i1	50.5598	-1.80019	0.53912	-3.33912	0.000840429	0.0399749	CFA20_MOUSE^CFA20_MOUSE^Q:139-714,H:1-192^99.479%ID^E:3.14e-134^RecName: Full=Cilia- and flagella-associated protein 20;^Eukaryota; Metazoa; Chordata; Craniata; Vertebrata; Euteleostomi; Mammalia; Eutheria; Euarchontoglires; Glires; Rodentia; Sciurognathi; Muroidea; Muridae; Murinae; Mus; Mus	PF05018.12^DUF667^Protein of unknown function (DUF667)^1-184^E:4.4e-96	GO:0005814^cellular_component^centriole`GO:0036064^cellular_component^ciliary basal body`GO:0005929^cellular_component^cilium`GO:0070062^cellular_component^extracellular exosome`GO:0005874^cellular_component^microtubule`GO:0005634^cellular_component^nucleus`GO:0003723^molecular_function^RNA binding`GO:0060271^biological_process^cilium assembly`GO:2000147^biological_process^positive regulation of …	.	No	No	No	No
c73253_g1_i1	52.7204	-1.72192	0.517767	-3.32567	0.000882061	0.0417956	CDY2_HUMAN^CDY2_HUMAN^Q:32-199,H:5-59^42.857%ID^E:7.29e-08^RecName: Full=Testis-specific chromodomain protein Y 2;^Eukaryota; Metazoa; Chordata; Craniata; Vertebrata; Euteleostomi; Mammalia; Eutheria; Euarchontoglires; Primates; Haplorrhini; Catarrhini; Hominidae; Homo	PF00385.23^Chromo^Chromo (CHRromatin Organisation MOdifier) domain^12-64^E:1.6e-12	GO:0005634^cellular_component^nucleus`GO:0004402^molecular_function^histone acetyltransferase activity`GO:0007283^biological_process^spermatogenesis	.	No	No	No	No
c61522_g2_i1	5.1748	-2.64114	0.795178	-3.32144	0.000895543	0.0421201	.	.	.	.	No	No	No	No
c61726_g1_i1	8.31061	-2.09841	0.631784	-3.3214	0.000895668	0.0421201	.	.	.	.	No	No	No	No
c74254_g2_i2	91.6883	0.605843	0.182633	3.31727	0.000909009	0.0425867	.	.	.	.	No	No	No	No
c75419_g1_i1	5.26219	-1.79986	0.542984	-3.31475	0.000917241	0.0428114	CEP70_MACFA^CEP70_MACFA^Q:61-1938,H:11-596^28.081%ID^E:4.79e-56^RecName: Full=Centrosomal protein of 70 kDa;^Eukaryota; Metazoa; Chordata; Craniata; Vertebrata; Euteleostomi; Mammalia; Eutheria; Euarchontoglires; Primates; Haplorrhini; Catarrhini; Cercopithecidae; Cercopithecinae; Macaca	.	GO:0005813^cellular_component^centrosome`GO:0005829^cellular_component^cytosol`GO:0042802^molecular_function^identical protein binding`GO:0097711^biological_process^ciliary basal body docking`GO:0000086^biological_process^G2/M transition of mitotic cell cycle	.	No	No	No	No
c56664_g1_i1	12.8969	1.7251	0.521045	3.31084	0.000930161	0.0430917	.	.	.	.	No	No	No	No
c74484_g1_i4	30.9016	-1.22482	0.369857	-3.31162	0.00092759	0.0430917	WDR35_RAT^WDR35_RAT^Q:435-2537,H:475-1169^66.573%ID^E:0^RecName: Full=WD repeat-containing protein 35;^Eukaryota; Metazoa; Chordata; Craniata; Vertebrata; Euteleostomi; Mammalia; Eutheria; Euarchontoglires; Glires; Rodentia; Sciurognathi; Muroidea; Muridae; Murinae; Rattus	PF13176.5^TPR_7^Tetratricopeptide repeat^271-294^E:0.028`PF00637.19^Clathrin^Region in Clathrin and VPS^298-396^E:3.8e-07	GO:0005930^cellular_component^axoneme`GO:0005813^cellular_component^centrosome`GO:0036064^cellular_component^ciliary basal body`GO:0005929^cellular_component^cilium`GO:0005737^cellular_component^cytoplasm`GO:0030991^cellular_component^intraciliary transport particle A`GO:0035091^molecular_function^phosphatidylinositol binding`GO:0071333^biological_process^cellular response to glucose stimulus`GO:…	GO:0005515^molecular_function^protein binding`GO:0006886^biological_process^intracellular protein transport`GO:0016192^biological_process^vesicle-mediated transport	No	No	No	No
c52598_g1_i1	20.8147	-3.88674	1.17509	-3.3076	0.000940992	0.0432717	KLHL2_HUMAN^KLHL2_HUMAN^Q:936-2663,H:38-588^24.415%ID^E:3.43e-45^RecName: Full=Kelch-like protein 2;^Eukaryota; Metazoa; Chordata; Craniata; Vertebrata; Euteleostomi; Mammalia; Eutheria; Euarchontoglires; Primates; Haplorrhini; Catarrhini; Hominidae; Homo`KLHL2_HUMAN^KLHL2_HUMAN^Q:1932-2759,H:318-570^30.072%ID^E:2.83e-24^RecName: Full=Kelch-like protein 2;^Eukaryota; Metazoa; Chordata; Craniata; …	PF00651.30^BTB^BTB/POZ domain^322-426^E:3.2e-18`PF07707.14^BACK^BTB And C-terminal Kelch^447-533^E:2e-16`PF01344.24^Kelch_1^Kelch motif^668-720^E:1.4e-06`PF13418.5^Kelch_4^Galactose oxidase, central domain^668-716^E:0.00012`PF13415.5^Kelch_3^Galactose oxidase, central domain^678-731^E:3.7e-07`PF01344.24^Kelch_1^Kelch motif^722-768^E:7.9e-11`PF13964.5^Kelch_6^Kelch motif^722-771^E:3.9e-06`PF13418.…	GO:0031463^cellular_component^Cul3-RING ubiquitin ligase complex`GO:0030134^cellular_component^ER to Golgi transport vesicle`GO:0000139^cellular_component^Golgi membrane`GO:0048208^biological_process^COPII vesicle coating`GO:0006888^biological_process^ER to Golgi vesicle-mediated transport`GO:0006513^biological_process^protein monoubiquitination`GO:0016055^biological_process^Wnt signaling pathway	GO:0005515^molecular_function^protein binding	No	No	Yes	No
c61073_g2_i1	19.3571	-1.40435	0.424507	-3.30819	0.000939017	0.0432717	CETN3_HUMAN^CETN3_HUMAN^Q:1-150,H:117-166^90%ID^E:9.78e-21^RecName: Full=Centrin-3;^Eukaryota; Metazoa; Chordata; Craniata; Vertebrata; Euteleostomi; Mammalia; Eutheria; Euarchontoglires; Primates; Haplorrhini; Catarrhini; Hominidae; Homo	.	GO:0005814^cellular_component^centriole`GO:0005813^cellular_component^centrosome`GO:0005730^cellular_component^nucleolus`GO:0005509^molecular_function^calcium ion binding`GO:0051301^biological_process^cell division`GO:0007098^biological_process^centrosome cycle`GO:0007067^biological_process^mitotic nuclear division	.	No	No	No	No
c68644_g1_i1	6.15311	1.17683	0.355929	3.30636	0.000945169	0.0433041	.	.	.	.	No	No	No	No
c61217_g1_i1	11.6222	-2.38639	0.722896	-3.30115	0.000962883	0.043954	CDKL2_PONAB^CDKL2_PONAB^Q:221-1141,H:1-307^69.381%ID^E:1.86e-161^RecName: Full=Cyclin-dependent kinase-like 2;^Eukaryota; Metazoa; Chordata; Craniata; Vertebrata; Euteleostomi; Mammalia; Eutheria; Euarchontoglires; Primates; Haplorrhini; Catarrhini; Hominidae; Pongo	PF00069.24^Pkinase^Protein kinase domain^4-287^E:1.1e-79`PF07714.16^Pkinase_Tyr^Protein tyrosine kinase^10-205^E:2.7e-35`PF12330.7^Haspin_kinase^Haspin like kinase domain^42-156^E:1.9e-07	GO:0005737^cellular_component^cytoplasm`GO:0005634^cellular_component^nucleus`GO:0005524^molecular_function^ATP binding`GO:0004693^molecular_function^cyclin-dependent protein serine/threonine kinase activity	GO:0004672^molecular_function^protein kinase activity`GO:0005524^molecular_function^ATP binding`GO:0006468^biological_process^protein phosphorylation	No	No	No	No
c63197_g1_i1	11.4584	-1.8242	0.553319	-3.29684	0.000977797	0.0444719	YC006_HUMAN^YC006_HUMAN^Q:1702-2928,H:2-408^40.338%ID^E:1.27e-96^RecName: Full=Uncharacterized protein FLJ43738;^Eukaryota; Metazoa; Chordata; Craniata; Vertebrata; Euteleostomi; Mammalia; Eutheria; Euarchontoglires; Primates; Haplorrhini; Catarrhini; Hominidae; Homo`YC006_HUMAN^YC006_HUMAN^Q:3262-3588,H:440-545^33.028%ID^E:1.99e-08^RecName: Full=Uncharacterized protein FLJ43738;^Eukaryota; Metaz…	PF15084.5^DUF4550^Domain of unknown function (DUF4550)^158-253^E:9.8e-30	.	.	No	No	No	No
c64971_g1_i1	76.9609	-4.54061	1.37938	-3.29179	0.000995528	0.0446269	FSIP2_MOUSE^FSIP2_MOUSE^Q:155-460,H:51-149^41.176%ID^E:4.05e-16^RecName: Full=Fibrous sheath-interacting protein 2;^Eukaryota; Metazoa; Chordata; Craniata; Vertebrata; Euteleostomi; Mammalia; Eutheria; Euarchontoglires; Glires; Rodentia; Sciurognathi; Muroidea; Muridae; Murinae; Mus; Mus	.	GO:0005739^cellular_component^mitochondrion`GO:0031514^cellular_component^motile cilium	.	No	No	No	No
c72503_g4_i1	6.78895	0.946041	0.287177	3.29428	0.000986732	0.0446269	.	.	.	.	No	No	No	No
c72582_g1_i1	5.10264	-2.37307	0.720785	-3.29233	0.000993595	0.0446269	.	.	.	.	No	No	No	No
c73063_g2_i5	45.157	-1.63671	0.49697	-3.29338	0.000989889	0.0446269	CASC1_HUMAN^CASC1_HUMAN^Q:1177-2211,H:382-716^39.193%ID^E:1.01e-65^RecName: Full=Protein CASC1;^Eukaryota; Metazoa; Chordata; Craniata; Vertebrata; Euteleostomi; Mammalia; Eutheria; Euarchontoglires; Primates; Haplorrhini; Catarrhini; Hominidae; Homo`CASC1_HUMAN^CASC1_HUMAN^Q:298-837,H:83-261^38.889%ID^E:5.32e-30^RecName: Full=Protein CASC1;^Eukaryota; Metazoa; Chordata; Craniata; Vertebrata; Eut…	PF15927.4^Casc1_N^Cancer susceptibility candidate 1 N-terminus^23-224^E:7.1e-51	.	.	No	No	No	No
c72514_g1_i1	4.95674	-1.65539	0.503855	-3.28545	0.00101819	0.0454789	.	.	.	.	No	No	No	No
c59393_g1_i1	11.7268	-2.03821	0.620961	-3.28234	0.0010295	0.045538	.	.	.	.	No	No	No	No
c62274_g2_i1	9.83055	1.17923	0.359273	3.28227	0.00102976	0.045538	.	.	.	.	No	No	No	No
c67090_g1_i1	11.069	-1.65782	0.505113	-3.28207	0.00103047	0.045538	CT096_HUMAN^CT096_HUMAN^Q:640-1356,H:126-363^28.745%ID^E:4.28e-14^RecName: Full=Uncharacterized protein C20orf96;^Eukaryota; Metazoa; Chordata; Craniata; Vertebrata; Euteleostomi; Mammalia; Eutheria; Euarchontoglires; Primates; Haplorrhini; Catarrhini; Hominidae; Homo	PF15397.5^DUF4618^Domain of unknown function (DUF4618)^106-364^E:1.2e-65	.	.	No	No	No	No
c65112_g1_i1	52.1753	-0.7189	0.219202	-3.27963	0.00103944	0.045772	ETFB_HUMAN^ETFB_HUMAN^Q:77-841,H:1-255^69.804%ID^E:5.37e-114^RecName: Full=Electron transfer flavoprotein subunit beta {ECO:0000305};^Eukaryota; Metazoa; Chordata; Craniata; Vertebrata; Euteleostomi; Mammalia; Eutheria; Euarchontoglires; Primates; Haplorrhini; Catarrhini; Hominidae; Homo	PF01012.20^ETF^Electron transfer flavoprotein domain^54-235^E:2.4e-47	GO:0005829^cellular_component^cytosol`GO:0070062^cellular_component^extracellular exosome`GO:0005759^cellular_component^mitochondrial matrix`GO:0009055^molecular_function^electron carrier activity`GO:0033539^biological_process^fatty acid beta-oxidation using acyl-CoA dehydrogenase`GO:0006479^biological_process^protein methylation`GO:0022904^biological_process^respiratory electron transport chain	.	No	No	No	No
c69115_g1_i1	42.7107	1.13931	0.34824	3.27162	0.00106935	0.0467588	.	.	.	.	No	No	No	No
c72929_g1_i1	20.4252	-3.27315	1.00043	-3.27175	0.00106886	0.0467588	.	PF15633.5^Tox-ART-HYD1^HYD1 signature containing ADP-ribosyltransferase^10-69^E:9.2e-09	.	.	No	No	No	No
c64459_g3_i1	92.0558	-0.447202	0.136773	-3.26966	0.00107676	0.0469181	CY12_SOLTU^CY12_SOLTU^Q:553-1263,H:21-257^54.008%ID^E:1.61e-86^RecName: Full=Cytochrome c1-2, heme protein, mitochondrial;^Eukaryota; Viridiplantae; Streptophyta; Embryophyta; Tracheophyta; Spermatophyta; Magnoliophyta; eudicotyledons; Gunneridae; Pentapetalae; asterids; lamiids; Solanales; Solanaceae; Solanoideae; Solaneae; Solanum	PF02167.14^Cytochrom_C1^Cytochrome C1 family^76-292^E:1.1e-85	GO:0016021^cellular_component^integral component of membrane`GO:0005743^cellular_component^mitochondrial inner membrane`GO:0070469^cellular_component^respiratory chain`GO:0009055^molecular_function^electron carrier activity`GO:0020037^molecular_function^heme binding`GO:0046872^molecular_function^metal ion binding`GO:0055114^biological_process^oxidation-reduction process	GO:0009055^molecular_function^electron carrier activity`GO:0020037^molecular_function^heme binding	No	No	No	No
c63914_g3_i1	10.0652	-3.31341	1.01436	-3.26651	0.00108883	0.0472789	.	.	.	.	No	No	No	No
c64739_g1_i1	14.1801	-1.99645	0.611717	-3.26369	0.00109971	0.0475853	.	.	.	.	No	No	No	No
c68817_g1_i1	66.5596	-0.710052	0.217757	-3.26075	0.00111116	0.0479145	ECHA_HUMAN^ECHA_HUMAN^Q:267-2471,H:27-762^61.737%ID^E:0^RecName: Full=Trifunctional enzyme subunit alpha, mitochondrial;^Eukaryota; Metazoa; Chordata; Craniata; Vertebrata; Euteleostomi; Mammalia; Eutheria; Euarchontoglires; Primates; Haplorrhini; Catarrhini; Hominidae; Homo	PF00378.19^ECH_1^Enoyl-CoA hydratase/isomerase^76-255^E:1.3e-38`PF16113.4^ECH_2^Enoyl-CoA hydratase/isomerase^82-255^E:1.3e-21`PF02737.17^3HCDH_N^3-hydroxyacyl-CoA dehydrogenase, NAD binding domain^396-573^E:3.2e-55`PF00725.21^3HCDH^3-hydroxyacyl-CoA dehydrogenase, C-terminal domain^576-671^E:4.4e-27	GO:0031012^cellular_component^extracellular matrix`GO:0016507^cellular_component^mitochondrial fatty acid beta-oxidation multienzyme complex`GO:0005743^cellular_component^mitochondrial inner membrane`GO:0042645^cellular_component^mitochondrial nucleoid`GO:0005739^cellular_component^mitochondrion`GO:0003857^molecular_function^3-hydroxyacyl-CoA dehydrogenase activity`GO:0003985^molecular_function^a…	GO:0003824^molecular_function^catalytic activity`GO:0008152^biological_process^metabolic process`GO:0003860^molecular_function^3-hydroxyisobutyryl-CoA hydrolase activity`GO:0003857^molecular_function^3-hydroxyacyl-CoA dehydrogenase activity`GO:0016491^molecular_function^oxidoreductase activity`GO:0006631^biological_process^fatty acid metabolic process`GO:0055114^biological_process^oxidation-reduc…	No	No	No	No
c59610_g1_i1	6.98055	-2.04577	0.62799	-3.25764	0.00112342	0.0479563	.	.	.	.	No	No	No	No
c60806_g1_i1	23.9103	-1.95737	0.601266	-3.25541	0.00113228	0.0479563	MNS1_DANRE^MNS1_DANRE^Q:255-1685,H:6-481^54.927%ID^E:2.41e-93^RecName: Full=Meiosis-specific nuclear structural protein 1;^Eukaryota; Metazoa; Chordata; Craniata; Vertebrata; Euteleostomi; Actinopterygii; Neopterygii; Teleostei; Ostariophysi; Cypriniformes; Cyprinidae; Danio	PF13868.5^TPH^Trichohyalin-plectin-homology domain^115-466^E:1.2e-83	GO:0031514^cellular_component^motile cilium`GO:0005634^cellular_component^nucleus`GO:0044782^biological_process^cilium organization`GO:0051321^biological_process^meiotic cell cycle	.	No	No	No	No
c63914_g4_i1	7.25381	-2.74654	0.843862	-3.25472	0.00113503	0.0479563	CCNB3_DROME^CCNB3_DROME^Q:618-1442,H:281-562^55.319%ID^E:3.51e-95^RecName: Full=G2/mitotic-specific cyclin-B3;^Eukaryota; Metazoa; Ecdysozoa; Arthropoda; Hexapoda; Insecta; Pterygota; Neoptera; Endopterygota; Diptera; Brachycera; Muscomorpha; Ephydroidea; Drosophilidae; Drosophila; Sophophora	PF00134.22^Cyclin_N^Cyclin, N-terminal domain^186-309^E:5.4e-40`PF02984.18^Cyclin_C^Cyclin, C-terminal domain^312-425^E:4.8e-30	GO:0005634^cellular_component^nucleus`GO:0007049^biological_process^cell cycle`GO:0051301^biological_process^cell division`GO:0000079^biological_process^regulation of cyclin-dependent protein serine/threonine kinase activity`GO:0010389^biological_process^regulation of G2/M transition of mitotic cell cycle	GO:0005634^cellular_component^nucleus	No	No	No	No
c74088_g2_i1	6.03596	-2.53284	0.777851	-3.2562	0.00112915	0.0479563	.	.	.	.	No	No	No	No
c74105_g2_i1	21.041	1.01756	0.312422	3.25702	0.0011259	0.0479563	.	.	.	.	No	No	No	No
c74538_g1_i1	13.1174	-1.42338	0.437335	-3.25468	0.00113522	0.0479563	TT30A_XENLA^TT30A_XENLA^Q:139-2076,H:1-637^77.709%ID^E:0^RecName: Full=Tetratricopeptide repeat protein 30A;^Eukaryota; Metazoa; Chordata; Craniata; Vertebrata; Euteleostomi; Amphibia; Batrachia; Anura; Pipoidea; Pipidae; Xenopodinae; Xenopus; Xenopus	PF03382.13^DUF285^Mycoplasma protein of unknown function, DUF285^429-493^E:0.025	GO:0005879^cellular_component^axonemal microtubule`GO:0005929^cellular_component^cilium`GO:0005215^molecular_function^transporter activity`GO:0042073^biological_process^intraciliary transport`GO:0018095^biological_process^protein polyglutamylation	.	No	No	No	No
c71496_g3_i4	19.1331	-1.65232	0.508069	-3.25216	0.00114533	0.0482201	CCD87_MOUSE^CCD87_MOUSE^Q:2751-3188,H:676-820^43.151%ID^E:5.66e-28^RecName: Full=Coiled-coil domain-containing protein 87;^Eukaryota; Metazoa; Chordata; Craniata; Vertebrata; Euteleostomi; Mammalia; Eutheria; Euarchontoglires; Glires; Rodentia; Sciurognathi; Muroidea; Muridae; Murinae; Mus; Mus`CCD87_MOUSE^CCD87_MOUSE^Q:1371-2285,H:351-619^25.641%ID^E:2.95e-18^RecName: Full=Coiled-coil domain-con…	.	.	.	No	No	No	No
c59725_g1_i1	38.0103	-1.47157	0.453175	-3.24725	0.00116526	0.048567	.	.	.	.	No	No	No	No
c62441_g1_i1	11.1186	-2.26787	0.69825	-3.24793	0.00116247	0.048567	CF118_HUMAN^CF118_HUMAN^Q:133-1500,H:41-451^25.546%ID^E:8.4e-24^RecName: Full=Uncharacterized protein C6orf118;^Eukaryota; Metazoa; Chordata; Craniata; Vertebrata; Euteleostomi; Mammalia; Eutheria; Euarchontoglires; Primates; Haplorrhini; Catarrhini; Hominidae; Homo	PF15739.4^TSNAXIP1_N^Translin-associated factor X-interacting N-terminus^258-370^E:1e-24	.	.	No	No	No	No
c70381_g2_i1	6.25378	1.70438	0.524785	3.24778	0.00116311	0.048567	TIMP3_MOUSE^TIMP3_MOUSE^Q:375-896,H:23-197^28.342%ID^E:1.05e-08^RecName: Full=Metalloproteinase inhibitor 3;^Eukaryota; Metazoa; Chordata; Craniata; Vertebrata; Euteleostomi; Mammalia; Eutheria; Euarchontoglires; Glires; Rodentia; Sciurognathi; Muroidea; Muridae; Murinae; Mus; Mus	PF00965.16^TIMP^Tissue inhibitor of metalloproteinase^18-197^E:1.1e-24`PF01759.20^NTR^UNC-6/NTR/C345C module^28-120^E:1.3e-05	GO:0005604^cellular_component^basement membrane`GO:0070062^cellular_component^extracellular exosome`GO:0005615^cellular_component^extracellular space`GO:0005634^cellular_component^nucleus`GO:0046872^molecular_function^metal ion binding`GO:0008191^molecular_function^metalloendopeptidase inhibitor activity`GO:0002020^molecular_function^protease binding`GO:0071310^biological_process^cellular respons…	GO:0008191^molecular_function^metalloendopeptidase inhibitor activity	No	Yes	Yes	No
c75190_g4_i1	18.989	0.874913	0.269511	3.2463	0.00116917	0.0485674	.	.	.	.	No	No	No	No
c40883_g1_i2	38.929	-3.26303	1.00571	-3.24449	0.00117659	0.048669	.	.	.	.	No	No	No	No
c63721_g2_i1	17.5102	-1.3276	0.40946	-3.24232	0.0011856	0.048669	SPICE_XENLA^SPICE_XENLA^Q:199-741,H:32-214^44.324%ID^E:1.28e-27^RecName: Full=Spindle and centriole-associated protein 1;^Eukaryota; Metazoa; Chordata; Craniata; Vertebrata; Euteleostomi; Amphibia; Batrachia; Anura; Pipoidea; Pipidae; Xenopodinae; Xenopus; Xenopus`SPICE_XENLA^SPICE_XENLA^Q:971-1291,H:302-405^37.383%ID^E:1.57e-09^RecName: Full=Spindle and centriole-associated protein 1;^Eukaryota;…	PF15678.4^SPICE^Centriole duplication and mitotic chromosome congression^3-132^E:1.3e-23	GO:0005814^cellular_component^centriole`GO:0005819^cellular_component^spindle`GO:0051301^biological_process^cell division`GO:0090307^biological_process^mitotic spindle assembly`GO:0046599^biological_process^regulation of centriole replication	GO:0090307^biological_process^mitotic spindle assembly	No	No	No	No
c75605_g1_i1	6.64899	-3.1257	0.963693	-3.24346	0.00118086	0.048669	KAD9_HUMAN^KAD9_HUMAN^Q:221-460,H:1087-1166^45%ID^E:7.12e-18^RecName: Full=Adenylate kinase 9;^Eukaryota; Metazoa; Chordata; Craniata; Vertebrata; Euteleostomi; Mammalia; Eutheria; Euarchontoglires; Primates; Haplorrhini; Catarrhini; Hominidae; Homo	PF00406.21^ADK^Adenylate kinase^67-184^E:2.5e-08	GO:0005737^cellular_component^cytoplasm`GO:0005829^cellular_component^cytosol`GO:0031965^cellular_component^nuclear membrane`GO:0005654^cellular_component^nucleoplasm`GO:0005634^cellular_component^nucleus`GO:0005524^molecular_function^ATP binding`GO:0004550^molecular_function^nucleoside diphosphate kinase activity`GO:0019206^molecular_function^nucleoside kinase activity`GO:0050145^molecular_funct…	.	No	No	No	No
c76403_g2_i2	5.46365	1.7486	0.539371	3.24193	0.00118724	0.048669	SO4A1_MOUSE^SO4A1_MOUSE^Q:160-2040,H:24-666^34.609%ID^E:6.31e-102^RecName: Full=Solute carrier organic anion transporter family member 4A1;^Eukaryota; Metazoa; Chordata; Craniata; Vertebrata; Euteleostomi; Mammalia; Eutheria; Euarchontoglires; Glires; Rodentia; Sciurognathi; Muroidea; Muridae; Murinae; Mus; Mus	PF03137.19^OATP^Organic Anion Transporter Polypeptide (OATP) family^68-627^E:1.2e-141`PF07690.15^MFS_1^Major Facilitator Superfamily^73-435^E:1.1e-14`PF07648.14^Kazal_2^Kazal-type serine protease inhibitor domain^467-512^E:9.1e-05	GO:0005887^cellular_component^integral component of plasma membrane`GO:0008514^molecular_function^organic anion transmembrane transporter activity`GO:0015711^biological_process^organic anion transport	GO:0005215^molecular_function^transporter activity`GO:0006810^biological_process^transport`GO:0016020^cellular_component^membrane`GO:0055085^biological_process^transmembrane transport`GO:0016021^cellular_component^integral component of membrane`GO:0005515^molecular_function^protein binding	No	No	No	No
c71126_g1_i1	28.0128	-1.04432	0.322242	-3.2408	0.00119195	0.0487021	DC2L1_BOVIN^DC2L1_BOVIN^Q:119-1081,H:6-330^52.147%ID^E:2.43e-112^RecName: Full=Cytoplasmic dynein 2 light intermediate chain 1;^Eukaryota; Metazoa; Chordata; Craniata; Vertebrata; Euteleostomi; Mammalia; Eutheria; Laurasiatheria; Cetartiodactyla; Ruminantia; Pecora; Bovidae; Bovinae; Bos	PF05783.10^DLIC^Dynein light intermediate chain (DLIC)^32-142^E:9.9e-05	GO:0045177^cellular_component^apical part of cell`GO:0005930^cellular_component^axoneme`GO:0005813^cellular_component^centrosome`GO:0036064^cellular_component^ciliary basal body`GO:0035869^cellular_component^ciliary transition zone`GO:0005737^cellular_component^cytoplasm`GO:0005868^cellular_component^cytoplasmic dynein complex`GO:0030990^cellular_component^intraciliary transport particle`GO:00058…	.	No	No	No	No
c77007_g4_i2	9.63945	-2.68708	0.829793	-3.23825	0.00120265	0.0489786	.	.	.	.	No	No	No	No
c5854_g1_i1	22.0494	-5.43778	1.68224	-3.23246	0.00122729	0.0495249	CE049_HUMAN^CE049_HUMAN^Q:353-607,H:46-130^42.353%ID^E:2.11e-13^RecName: Full=Uncharacterized protein C5orf49;^Eukaryota; Metazoa; Chordata; Craniata; Vertebrata; Euteleostomi; Mammalia; Eutheria; Euarchontoglires; Primates; Haplorrhini; Catarrhini; Hominidae; Homo	PF15074.5^DUF4541^Domain of unknown function (DUF4541)^80-161^E:2e-24	.	.	No	No	No	No
c72013_g3_i1	12.8938	1.85185	0.57292	3.2323	0.00122799	0.0495249	CHIA_RAT^CHIA_RAT^Q:193-1371,H:4-388^44.081%ID^E:2.74e-113^RecName: Full=Acidic mammalian chitinase;^Eukaryota; Metazoa; Chordata; Craniata; Vertebrata; Euteleostomi; Mammalia; Eutheria; Euarchontoglires; Glires; Rodentia; Sciurognathi; Muroidea; Muridae; Murinae; Rattus	PF00704.27^Glyco_hydro_18^Glycosyl hydrolases family 18^28-370^E:3.2e-87	GO:0005737^cellular_component^cytoplasm`GO:0005576^cellular_component^extracellular region`GO:0005615^cellular_component^extracellular space`GO:0008061^molecular_function^chitin binding`GO:0004568^molecular_function^chitinase activity`GO:0006915^biological_process^apoptotic process`GO:0006032^biological_process^chitin catabolic process`GO:0002376^biological_process^immune system process`GO:000027…	GO:0005975^biological_process^carbohydrate metabolic process	Yes	No	No	No
c74657_g2_i1	46.5011	0.73129	0.226157	3.23356	0.00122259	0.0495249	.	.	.	.	No	No	No	No
c43370_g1_i1	12.1838	-2.38629	0.738841	-3.22977	0.0012389	0.0497409	RSP14_MOUSE^RSP14_MOUSE^Q:81-1103,H:1-341^47.368%ID^E:2.21e-96^RecName: Full=Radial spoke head 14 homolog;^Eukaryota; Metazoa; Chordata; Craniata; Vertebrata; Euteleostomi; Mammalia; Eutheria; Euarchontoglires; Glires; Rodentia; Sciurognathi; Muroidea; Muridae; Murinae; Mus; Mus	PF13646.5^HEAT_2^HEAT repeats^193-295^E:1.4e-09`PF00514.22^Arm^Armadillo/beta-catenin-like repeat^226-253^E:0.00019`PF13646.5^HEAT_2^HEAT repeats^231-299^E:2.2e-07`PF02985.21^HEAT^HEAT repeat^231-256^E:0.00027	.	GO:0005515^molecular_function^protein binding	No	No	No	No
c66529_g2_i1	13.9086	-2.2072	0.683626	-3.22867	0.00124367	0.0497409	NDK7_HUMAN^NDK7_HUMAN^Q:85-1200,H:2-374^58.933%ID^E:2.57e-165^RecName: Full=Nucleoside diphosphate kinase 7;^Eukaryota; Metazoa; Chordata; Craniata; Vertebrata; Euteleostomi; Mammalia; Eutheria; Euarchontoglires; Primates; Haplorrhini; Catarrhini; Hominidae; Homo`NDK7_HUMAN^NDK7_HUMAN^Q:796-1203,H:94-226^33.824%ID^E:3.14e-15^RecName: Full=Nucleoside diphosphate kinase 7;^Eukaryota; Metazoa; Chord…	PF00334.18^NDK^Nucleoside diphosphate kinase^93-225^E:1.6e-40`PF00334.18^NDK^Nucleoside diphosphate kinase^239-372^E:2.8e-32	GO:0005813^cellular_component^centrosome`GO:0005524^molecular_function^ATP binding`GO:0046872^molecular_function^metal ion binding`GO:0004550^molecular_function^nucleoside diphosphate kinase activity`GO:0006241^biological_process^CTP biosynthetic process`GO:0006183^biological_process^GTP biosynthetic process`GO:0006228^biological_process^UTP biosynthetic process	GO:0004550^molecular_function^nucleoside diphosphate kinase activity`GO:0006165^biological_process^nucleoside diphosphate phosphorylation`GO:0006183^biological_process^GTP biosynthetic process`GO:0006228^biological_process^UTP biosynthetic process`GO:0006241^biological_process^CTP biosynthetic process	No	No	No	No
c73319_g1_i2	13.1605	-1.42676	0.441956	-3.22829	0.00124532	0.0497409	IF122_DANRE^IF122_DANRE^Q:109-3879,H:1-1185^65.632%ID^E:0^RecName: Full=Intraflagellar transport protein 122 homolog;^Eukaryota; Metazoa; Chordata; Craniata; Vertebrata; Euteleostomi; Actinopterygii; Neopterygii; Teleostei; Ostariophysi; Cypriniformes; Cyprinidae; Danio	PF00400.31^WD40^WD domain, G-beta repeat^50-86^E:9.6e-06`PF00400.31^WD40^WD domain, G-beta repeat^265-292^E:0.095`PF13176.5^TPR_7^Tetratricopeptide repeat^709-730^E:0.0065	GO:0005929^cellular_component^cilium`GO:0005737^cellular_component^cytoplasm`GO:0005856^cellular_component^cytoskeleton`GO:0030991^cellular_component^intraciliary transport particle A`GO:0048593^biological_process^camera-type eye morphogenesis`GO:0060271^biological_process^cilium assembly`GO:0010172^biological_process^embryonic body morphogenesis`GO:0007507^biological_process^heart development`GO…	GO:0005515^molecular_function^protein binding	No	No	Yes	No
c71758_g2_i2	18.8178	-2.00188	0.620436	-3.22657	0.00125286	0.0497815	F183B_MOUSE^F183B_MOUSE^Q:93-443,H:14-130^53.846%ID^E:7.31e-30^RecName: Full=Protein FAM183B;^Eukaryota; Metazoa; Chordata; Craniata; Vertebrata; Euteleostomi; Mammalia; Eutheria; Euarchontoglires; Glires; Rodentia; Sciurognathi; Muroidea; Muridae; Murinae; Mus; Mus	PF14886.5^FAM183^FAM183A and FAM183B related^15-118^E:6.2e-34	.	.	No	No	No	No
c74436_g1_i1	21.5267	-2.23516	0.693004	-3.22532	0.00125832	0.0497815	.	.	.	.	No	No	No	No
c77366_g1_i1	10.688	-2.32842	0.72182	-3.22577	0.00125636	0.0497815	CFA65_CHICK^CFA65_CHICK^Q:1-4860,H:188-1758^38.217%ID^E:0^RecName: Full=Cilia- and flagella-associated protein 65 {ECO:0000305};^Eukaryota; Metazoa; Chordata; Craniata; Vertebrata; Euteleostomi; Archelosauria; Archosauria; Dinosauria; Saurischia; Theropoda; Coelurosauria; Aves; Neognathae; Galloanserae; Galliformes; Phasianidae; Phasianinae; Gallus	.	GO:0016021^cellular_component^integral component of membrane`GO:0031514^cellular_component^motile cilium`GO:0005886^cellular_component^plasma membrane	.	No	No	No	No

## Sheet: Table S3 - Enrichment analysis
Table S3. Gene Ontology 'Biological Process' enrichments within calcification-associated differentially expressed transcripts.
Biological process	GO accession	Adjusted P Value
cilium organization	0044782	3.56e-34
cilium assembly	0060271	1.49e-31
microtubule-based process	0007017	8.03e-30
plasma membrane bounded cell projection assembly	0120031	5.52e-29
cell projection assembly	0030031	7.38e-29
microtubule-based movement	0007018	1.66e-26
organelle assembly	0070925	2.12e-25
cell projection organization	0030030	1.01e-23
axoneme assembly	0035082	1.33e-19
plasma membrane bounded cell projection organization	0120036	1.3e-18
microtubule bundle formation	0001578	3.95e-18
movement of cell or subcellular component	0006928	5.97e-17
cilium movement	0003341	3.79e-16
microtubule cytoskeleton organization	0000226	1.15e-12
cilium or flagellum-dependent cell motility	0001539	1.41e-12
cilium-dependent cell motility	0060285	2.55e-11
cellular component assembly	0022607	2.33e-10
sperm motility	0097722	5.17e-10
flagellated sperm motility	0030317	5.17e-10
spermatogenesis	0007283	1.15e-09
male gamete generation	0048232	1.92e-09
organelle organization	0006996	2.36e-09
cellular component biogenesis	0044085	2.67e-08
axonemal dynein complex assembly	0070286	1.63e-07
intraciliary transport	0042073	5.31e-07
gamete generation	0007276	5.33e-07
cilium movement involved in cell motility	0060294	1.16e-06
sexual reproduction	0019953	1.25e-06
determination of left/right symmetry	0007368	1.77e-06
cytoskeleton organization	0007010	2.92e-06
cellular component organization	0016043	3.25e-06
specification of symmetry	0009799	3.62e-06
determination of bilateral symmetry	0009855	3.62e-06
multi-organism reproductive process	0044703	5.34e-06
multicellular organismal reproductive process	0048609	5.77e-06
multicellular organism reproduction	0032504	5.87e-06
localization of cell	0051674	1.3e-05
cell motility	0048870	1.3e-05
spermatid development	0007286	2.09e-05
nucleobase-containing small molecule interconversion	0015949	2.09e-05
inner dynein arm assembly	0036159	2.31e-05
spermatid differentiation	0048515	2.65e-05
cellular component organization or biogenesis	0071840	2.65e-05
purine deoxyribonucleoside triphosphate biosynthetic process	0009216	6.57e-05
nucleoside monophosphate phosphorylation	0046940	6.57e-05
motile cilium assembly	0044458	6.57e-05
CDP phosphorylation	0061508	6.57e-05
dADP phosphorylation	0006174	6.57e-05
dGDP phosphorylation	0006186	6.57e-05
sperm axoneme assembly	0007288	6.57e-05
dCDP phosphorylation	0061570	6.57e-05
TDP phosphorylation	0061571	6.57e-05
axonemal central apparatus assembly	1904158	6.57e-05
dGDP metabolic process	0046066	6.57e-05
AMP phosphorylation	0006756	6.57e-05
GDP phosphorylation	0061568	6.57e-05
UDP phosphorylation	0061569	6.57e-05
dCMP phosphorylation	0061567	6.57e-05
dAMP phosphorylation	0061565	6.57e-05
CMP phosphorylation	0061566	6.57e-05
microtubule-based transport	0099111	0.000142
transport along microtubule	0010970	0.000142
reproductive process	0022414	0.000222
reproduction	0000003	0.000225
dADP metabolic process	0046056	0.000229
deoxyribonucleoside triphosphate biosynthetic process	0009202	0.000229
deoxyribonucleoside diphosphate metabolic process	0009186	0.000229
purine deoxyribonucleoside diphosphate metabolic process	0009182	0.000229
cytoskeleton-dependent intracellular transport	0030705	0.00024
nucleoside triphosphate biosynthetic process	0009142	0.000259
intraciliary transport involved in cilium assembly	0035735	0.000516
AMP metabolic process	0046033	0.000521
regulation of cilium movement	0003352	0.000521
regulation of cilium beat frequency	0003356	0.000521
locomotion	0040011	0.000782
nucleoside diphosphate phosphorylation	0006165	0.000788
nucleotide phosphorylation	0046939	0.000788
epithelial cilium movement involved in determination of left/right asymmetry	0060287	0.000978
purine nucleoside triphosphate biosynthetic process	0009145	0.00106
purine ribonucleoside triphosphate biosynthetic process	0009206	0.00106
epithelial cilium movement	0003351	0.00111
ribonucleoside triphosphate biosynthetic process	0009201	0.00116
nucleoside diphosphate metabolic process	0009132	0.00166
regulation of microtubule-based movement	0060632	0.00249
protein-containing complex localization	0031503	0.00394
ATP generation from ADP	0006757	0.0047
purine deoxyribonucleoside triphosphate metabolic process	0009215	0.00498
purine deoxyribonucleotide metabolic process	0009151	0.00498
non-motile cilium assembly	1905515	0.00635
germ cell development	0007281	0.00665
ADP metabolic process	0046031	0.00725
purine nucleoside diphosphate metabolic process	0009135	0.00823
purine ribonucleoside diphosphate metabolic process	0009179	0.00823
deoxyribonucleoside triphosphate metabolic process	0009200	0.00837
ribonucleoside diphosphate metabolic process	0009185	0.0093
multi-organism process	0051704	0.0096

## Sheet: Table S4 - Underskin
Table S4. Transcripts differentially expressed between sacs producing pearls with 'underskin' and those without
Transcript ID	Mean of normalised counts - all samples	No defect vs with defect					Trinotate transcript annotation
		log2 Fold change	log2 fold change standard error	Wald statistic	Wald test p-value	Adjusted P-value	Swissprot top BLASTX hit	Pfam domains	Gene Ontology - BLAST	Gene Ontology - Pfam	Shell matrix protein reciprocol hit?	Likely identified in Le Luyer et al 2019?	Likely signalling function?	Likely transcription factor?
c52227_g1_i2	2.60081	3.18174	0.629603	5.05356	4.34e-07	0.00586917	TGMH_TACTR^TGMH_TACTR^Q:5-1465,H:282-763^40.443%ID^E:7.05e-113^RecName: Full=Hemocyte protein-glutamine gamma-glutamyltransferase;^Eukaryota; Metazoa; Ecdysozoa; Arthropoda; Chelicerata; Merostomata; Xiphosura; Limulidae; Tachypleus	PF01841.18^Transglut_core^Transglutaminase-like superfamily^58-144^E:1.3e-16`PF00927.21^Transglut_C^Transglutaminase family, C-terminal ig like domain^279-379^E:1e-06`PF00927.21^Transglut_C^Transglutaminase family, C-terminal ig like domain^399-486^E:8.2e-08	GO:0016020^cellular_component^membrane`GO:0046872^molecular_function^metal ion binding`GO:0003810^molecular_function^protein-glutamine gamma-glutamyltransferase activity`GO:0018149^biological_process^peptide cross-linking	GO:0003810^molecular_function^protein-glutamine gamma-glutamyltransferase activity`GO:0018149^biological_process^peptide cross-linking	No	No	No	No
c66069_g1_i1	32.9163	4.04416	0.780442	5.18189	2.2e-07	0.00586917	.	.	.	.	No	Yes	No	No
c61489_g1_i2	67.8269	5.91942	1.20882	4.89686	9.74e-07	0.00878667	.	.	.	.	No	No	No	No
c76142_g6_i1	21.8389	-2.31095	0.514003	-4.49599	6.92e-06	0.0468609	.	.	.	.	No	No	No	No

## Sheet: Table S5 - Weight
Table S5. Transcripts differentially expressed between sacs producing pearls with different weights
Transcript ID	Mean of normalised counts - all samples	Weight					Trinotate transcript annotation
		log2 Fold change	log2 fold change standard error	Wald statistic	Wald test p-value	Adjusted P-value	Swissprot top BLASTX hit	Pfam domains	Gene Ontology - BLAST	Gene Ontology - Pfam	Shell matrix protein reciprocol hit?	Likely identified in Le Luyer et al 2019?	Likely signalling function?	Likely transcription factor?
c74149_g3_i1	29.9317	11.8272	1.769	6.68584	2.3e-11	4.75e-07	.	.	.	.	No	No	No	No
c74149_g2_i2	60.5758	11.9192	1.89776	6.28065	3.37e-10	3.49e-06	.	.	.	.	No	No	No	No
c65161_g1_i1	16.1666	-10.9593	1.87616	-5.84136	5.18e-09	3.57e-05	.	.	.	.	No	No	No	No
c70290_g1_i3	66.7332	-8.84503	1.63956	-5.39476	6.86e-08	0.000354959	.	.	.	.	No	No	No	No
c66918_g1_i1	16.7137	7.14608	1.34864	5.29872	1.17e-07	0.000482621	HVCN1_CHICK^HVCN1_CHICK^Q:1144-1440,H:100-195^38.384%ID^E:4.51e-07^RecName: Full=Voltage-gated hydrogen channel 1;^Eukaryota; Metazoa; Chordata; Craniata; Vertebrata; Euteleostomi; Archelosauria; Archosauria; Dinosauria; Saurischia; Theropoda; Coelurosauria; Aves; Neognathae; Galloanserae; Galliformes; Phasianidae; Phasianinae; Gallus	.	GO:0016021^cellular_component^integral component of membrane`GO:0005887^cellular_component^integral component of plasma membrane`GO:0030171^molecular_function^voltage-gated proton channel activity`GO:0071467^biological_process^cellular response to pH`GO:0071294^biological_process^cellular response to zinc ion`GO:0015992^biological_process^proton transport`GO:0009268^biological_process^response to…	.	No	No	No	No
c63203_g4_i1	12.9159	-13.5415	2.68016	-5.0525	4.36e-07	0.00150389	.	.	.	.	No	No	No	No
c69953_g2_i1	11.7375	7.13495	1.4413	4.95036	7.41e-07	0.00218983	PIF_PINMG^PIF_PINMG^Q:239-1381,H:1-379^96.063%ID^E:0^RecName: Full=Protein PIF;^Eukaryota; Metazoa; Lophotrochozoa; Mollusca; Bivalvia; Pteriomorphia; Pterioida; Pterioidea; Pteriidae; Pinctada	PF00092.27^VWA^von Willebrand factor type A domain^31-191^E:3.6e-15`PF01607.23^CBM_14^Chitin binding Peritrophin-A domain^272-321^E:2.5e-05	GO:0005576^cellular_component^extracellular region`GO:0008061^molecular_function^chitin binding`GO:0006030^biological_process^chitin metabolic process	GO:0008061^molecular_function^chitin binding`GO:0006030^biological_process^chitin metabolic process`GO:0005576^cellular_component^extracellular region	Yes	No	No	No
c72343_g2_i1	10.2017	8.63919	1.75487	4.92297	8.52e-07	0.00220481	.	.	.	.	No	No	No	No
c72343_g1_i9	41.5175	7.91379	1.62809	4.86079	1.17e-06	0.00268817	.	.	.	.	No	No	No	No
c63292_g1_i1	94.476	7.20153	1.49523	4.81634	1.46e-06	0.00275056	.	.	.	.	Yes	No	No	No
c70544_g3_i2	16.8211	6.06959	1.25885	4.82154	1.42e-06	0.00275056	EF1D_XENLA^EF1D_XENLA^Q:50-316,H:1-95^34.737%ID^E:1.06e-08^RecName: Full=Elongation factor 1-delta;^Eukaryota; Metazoa; Chordata; Craniata; Vertebrata; Euteleostomi; Amphibia; Batrachia; Anura; Pipoidea; Pipidae; Xenopodinae; Xenopus; Xenopus	PF13176.5^TPR_7^Tetratricopeptide repeat^26-49^E:0.013	GO:0005853^cellular_component^eukaryotic translation elongation factor 1 complex`GO:0003746^molecular_function^translation elongation factor activity	GO:0005515^molecular_function^protein binding	No	No	No	No
c53345_g1_i2	7.95213	5.31122	1.12807	4.70822	2.5e-06	0.00403886	.	.	.	.	No	No	No	No
c69766_g3_i1	4.59883	6.30456	1.33994	4.70511	2.54e-06	0.00403886	.	.	.	.	Yes	No	No	No
c74528_g1_i1	12.8367	-3.03041	0.655366	-4.62399	3.76e-06	0.00556376	VWKA_DICDI^VWKA_DICDI^Q:1383-1646,H:498-594^34.021%ID^E:1.16e-08^RecName: Full=Alpha-protein kinase vwkA;^Eukaryota; Amoebozoa; Mycetozoa; Dictyosteliida; Dictyostelium	PF02816.17^Alpha_kinase^Alpha-kinase family^61-236^E:1.2e-22	GO:0031164^cellular_component^contractile vacuolar membrane`GO:0000331^cellular_component^contractile vacuole`GO:0005737^cellular_component^cytoplasm`GO:0005829^cellular_component^cytosol`GO:0048471^cellular_component^perinuclear region of cytoplasm`GO:0005524^molecular_function^ATP binding`GO:0005516^molecular_function^calmodulin binding`GO:0004672^molecular_function^protein kinase activity`GO:0…	GO:0004674^molecular_function^protein serine/threonine kinase activity`GO:0005524^molecular_function^ATP binding`GO:0006468^biological_process^protein phosphorylation	No	No	No	No
c73260_g2_i1	3.29911	-12.7552	2.76904	-4.60638	4.1e-06	0.00565259	.	.	.	.	No	No	No	No
c73596_g2_i2	205.592	-6.42646	1.40404	-4.57711	4.71e-06	0.00609732	SLEB_BACCR^SLEB_BACCR^Q:247-645,H:145-257^34.328%ID^E:5.72e-10^RecName: Full=Spore cortex-lytic enzyme;^Bacteria; Firmicutes; Bacilli; Bacillales; Bacillaceae; Bacillus; Bacillus cereus group	PF07486.11^Hydrolase_2^Cell Wall Hydrolase^40-157^E:6.2e-19	GO:0042763^cellular_component^intracellular immature spore`GO:0016787^molecular_function^hydrolase activity`GO:0071555^biological_process^cell wall organization`GO:0009847^biological_process^spore germination`GO:0030435^biological_process^sporulation resulting in formation of a cellular spore	GO:0016787^molecular_function^hydrolase activity	Yes	No	No	No
c70735_g3_i1	4.07424	-5.74991	1.26615	-4.54126	5.59e-06	0.00680678	ETS4_DROME^ETS4_DROME^Q:798-1592,H:249-516^41.304%ID^E:2.43e-47^RecName: Full=DNA-binding protein D-ETS-4;^Eukaryota; Metazoa; Ecdysozoa; Arthropoda; Hexapoda; Insecta; Pterygota; Neoptera; Endopterygota; Diptera; Brachycera; Muscomorpha; Ephydroidea; Drosophilidae; Drosophila; Sophophora	PF02198.15^SAM_PNT^Sterile alpha motif (SAM)/Pointed domain^183-262^E:1.4e-13`PF00178.21^Ets^Ets-domain^347-429^E:1.2e-33	GO:0005634^cellular_component^nucleus`GO:0000981^molecular_function^RNA polymerase II transcription factor activity, sequence-specific DNA binding`GO:0043565^molecular_function^sequence-specific DNA binding`GO:0030154^biological_process^cell differentiation`GO:0060576^biological_process^intestinal epithelial cell development`GO:0060480^biological_process^lung goblet cell differentiation`GO:000727…	GO:0043565^molecular_function^sequence-specific DNA binding`GO:0005634^cellular_component^nucleus`GO:0003700^molecular_function^transcription factor activity, sequence-specific DNA binding`GO:0006355^biological_process^regulation of transcription, DNA-templated	No	Yes	No	Yes
c67069_g1_i1	3.17704	-22.9558	5.10042	-4.50077	6.77e-06	0.00778372	.	.	.	.	No	No	No	No
c60561_g1_i1	4.49637	6.21897	1.39881	4.44589	8.75e-06	0.00826196	.	.	.	.	No	No	No	No
c62199_g2_i1	28.6237	-3.32915	0.748721	-4.44645	8.73e-06	0.00826196	.	.	.	.	No	No	No	No
c70245_g1_i2	9.82914	6.55283	1.47734	4.43557	9.18e-06	0.00826196	.	.	.	.	No	Yes	No	No
c76160_g1_i3	27.6623	8.19913	1.84761	4.4377	9.09e-06	0.00826196	.	.	.	.	No	No	No	No
c76258_g1_i1	50.9442	1.96258	0.438967	4.47091	7.79e-06	0.00826196	SUOX_DROME^SUOX_DROME^Q:494-1879,H:105-567^53.305%ID^E:1.03e-163^RecName: Full=Probable sulfite oxidase, mitochondrial;^Eukaryota; Metazoa; Ecdysozoa; Arthropoda; Hexapoda; Insecta; Pterygota; Neoptera; Endopterygota; Diptera; Brachycera; Muscomorpha; Ephydroidea; Drosophilidae; Drosophila; Sophophora	PF00173.27^Cyt-b5^Cytochrome b5-like Heme/Steroid binding domain^134-207^E:4.2e-15`PF00174.18^Oxidored_molyb^Oxidoreductase molybdopterin binding domain^265-442^E:1.9e-60`PF03404.15^Mo-co_dimer^Mo-co oxidoreductase dimerisation domain^466-590^E:1.5e-38	GO:0005758^cellular_component^mitochondrial intermembrane space`GO:0020037^molecular_function^heme binding`GO:0030151^molecular_function^molybdenum ion binding`GO:0008482^molecular_function^sulfite oxidase activity`GO:0042128^biological_process^nitrate assimilation`GO:0006790^biological_process^sulfur compound metabolic process	GO:0042128^biological_process^nitrate assimilation`GO:0016491^molecular_function^oxidoreductase activity`GO:0030151^molecular_function^molybdenum ion binding`GO:0055114^biological_process^oxidation-reduction process	Yes	No	No	No
c36377_g1_i1	5.12676	-9.32807	2.12595	-4.38771	1.15e-05	0.00955231	.	.	.	.	No	No	No	No
c74438_g2_i1	5.36518	-8.89465	2.02792	-4.38609	1.15e-05	0.00955231	.	.	.	.	No	No	No	No
c64105_g1_i2	79.4138	-7.31678	1.67154	-4.37728	1.2e-05	0.00956416	.	.	.	.	No	Yes	No	No
c63665_g1_i1	37.3967	-3.81423	0.873073	-4.36874	1.25e-05	0.00957742	.	.	.	.	No	No	No	No
c72694_g1_i2	15.392	8.08221	1.85517	4.3566	1.32e-05	0.00976267	.	.	.	.	No	No	No	No
c44548_g1_i2	5.91449	-10.4642	2.40696	-4.34749	1.38e-05	0.00982609	.	.	.	.	No	No	No	No
c66274_g2_i1	6.86617	-3.25077	0.765583	-4.24614	2.17e-05	0.0150012	FUCTA_DROME^FUCTA_DROME^Q:506-1327,H:167-439^33.803%ID^E:7.95e-34^RecName: Full=Glycoprotein 3-alpha-L-fucosyltransferase A;^Eukaryota; Metazoa; Ecdysozoa; Arthropoda; Hexapoda; Insecta; Pterygota; Neoptera; Endopterygota; Diptera; Brachycera; Muscomorpha; Ephydroidea; Drosophilidae; Drosophila; Sophophora	PF17039.4^Glyco_tran_10_N^Fucosyltransferase, N-terminal^56-162^E:5.7e-20`PF00852.18^Glyco_transf_10^Glycosyltransferase family 10 (fucosyltransferase) C-term^182-349^E:1.9e-46	GO:0032580^cellular_component^Golgi cisterna membrane`GO:0005797^cellular_component^Golgi medial cisterna`GO:0000139^cellular_component^Golgi membrane`GO:0016021^cellular_component^integral component of membrane`GO:0033932^molecular_function^1,3-alpha-L-fucosidase activity`GO:0046920^molecular_function^alpha-(1->3)-fucosyltransferase activity`GO:0008417^molecular_function^fucosyltransferase activ…	GO:0008417^molecular_function^fucosyltransferase activity`GO:0006486^biological_process^protein glycosylation`GO:0016020^cellular_component^membrane	No	No	No	No
c73341_g4_i4	8.9602	2.90076	0.684859	4.23555	2.28e-05	0.0152187	YTX2_XENLA^YTX2_XENLA^Q:1451-3079,H:358-892^29.167%ID^E:4.18e-60^RecName: Full=Transposon TX1 uncharacterized 149 kDa protein;^Eukaryota; Metazoa; Chordata; Craniata; Vertebrata; Euteleostomi; Amphibia; Batrachia; Anura; Pipoidea; Pipidae; Xenopodinae; Xenopus; Xenopus`YTX2_XENLA^YTX2_XENLA^Q:350-1129,H:8-268^29.74%ID^E:6.32e-20^RecName: Full=Transposon TX1 uncharacterized 149 kDa protein;^Eukary…	PF00078.26^RVT_1^Reverse transcriptase (RNA-dependent DNA polymerase)^547-801^E:1.3e-39`PF13966.5^zf-RVT^zinc-binding in reverse transcriptase^1111-1183^E:4.2e-08	.	.	No	No	No	No
c18440_g1_i1	2.53179	-12.5785	3.00785	-4.18188	2.89e-05	0.0186957	.	.	.	.	No	No	No	No
c61530_g1_i2	5.20403	-7.21858	1.74345	-4.14041	3.47e-05	0.0199277	.	.	.	.	No	No	No	No
c67102_g2_i1	62.8442	-1.98352	0.477981	-4.1498	3.33e-05	0.0199277	.	.	.	.	No	No	No	No
c70211_g1_i3	29.8503	-6.80904	1.64263	-4.1452	3.4e-05	0.0199277	.	.	.	.	No	No	No	No
c73619_g5_i1	11.8218	-4.49458	1.08355	-4.148	3.35e-05	0.0199277	.	.	.	.	No	No	No	No
c61489_g1_i2	67.8269	-13.7815	3.36163	-4.09965	4.14e-05	0.0218371	.	.	.	.	No	No	No	No
c63208_g1_i1	24.693	-7.62841	1.86119	-4.09868	4.16e-05	0.0218371	.	PF00095.20^WAP^WAP-type (Whey Acidic Protein) 'four-disulfide core'^42-84^E:4.1e-08`PF00095.20^WAP^WAP-type (Whey Acidic Protein) 'four-disulfide core'^379-423^E:5.6e-05`PF00095.20^WAP^WAP-type (Whey Acidic Protein) 'four-disulfide core'^448-494^E:1.3e-07	.	GO:0030414^molecular_function^peptidase inhibitor activity`GO:0005576^cellular_component^extracellular region	No	Yes	No	No
c63221_g3_i2	4.58344	-11.0254	2.6924	-4.09503	4.22e-05	0.0218371	.	.	.	.	No	No	No	No
c65348_g7_i1	9.11332	-2.74121	0.667712	-4.10538	4.04e-05	0.0218371	.	.	.	.	No	No	No	No
c28067_g1_i1	3.35179	-4.94442	1.2283	-4.02542	5.69e-05	0.0278482	.	.	.	.	No	No	No	No
c63601_g1_i2	198.611	-5.71549	1.42321	-4.01592	5.92e-05	0.0278482	.	.	.	.	No	No	No	No
c66245_g2_i1	15.2512	5.47349	1.36044	4.02332	5.74e-05	0.0278482	.	.	.	.	No	No	No	No
c69857_g4_i1	5.10453	-9.59731	2.38662	-4.0213	5.79e-05	0.0278482	.	.	.	.	No	No	No	No
c75473_g4_i1	400.374	2.27023	0.570069	3.98238	6.82e-05	0.0313749	.	.	.	.	No	No	No	No
c67129_g1_i1	205.894	2.23337	0.562669	3.96924	7.21e-05	0.0324353	.	.	.	.	No	No	No	No
c65232_g1_i1	13.0451	-10.4599	2.64579	-3.9534	7.7e-05	0.0339223	USP1_PINMG^USP1_PINMG^Q:85-516,H:1-144^51.389%ID^E:9.64e-44^RecName: Full=Uncharacterized shell protein 1;^Eukaryota; Metazoa; Lophotrochozoa; Mollusca; Bivalvia; Pteriomorphia; Pterioida; Pterioidea; Pteriidae; Pinctada	PF00965.16^TIMP^Tissue inhibitor of metalloproteinase^25-131^E:2.3e-08	GO:0005576^cellular_component^extracellular region	GO:0008191^molecular_function^metalloendopeptidase inhibitor activity	Yes	Yes	No	No
c71931_g2_i1	11.7254	-4.62533	1.17802	-3.92634	8.62e-05	0.036423	.	.	.	.	No	No	No	No
c76625_g2_i5	55.5448	-4.27903	1.08969	-3.92684	8.61e-05	0.036423	BIR7B_XENLA^BIR7B_XENLA^Q:1639-2250,H:142-345^36.574%ID^E:2.65e-44^RecName: Full=Baculoviral IAP repeat-containing protein 7-B;^Eukaryota; Metazoa; Chordata; Craniata; Vertebrata; Euteleostomi; Amphibia; Batrachia; Anura; Pipoidea; Pipidae; Xenopodinae; Xenopus; Xenopus`BIR7B_XENLA^BIR7B_XENLA^Q:1675-1875,H:46-113^48.529%ID^E:7.22e-11^RecName: Full=Baculoviral IAP repeat-containing protein 7-B;^E…	PF00653.20^BIR^Inhibitor of Apoptosis domain^264-328^E:8e-17`PF00653.20^BIR^Inhibitor of Apoptosis domain^559-623^E:5.9e-18`PF13920.5^zf-C3HC4_3^Zinc finger, C3HC4 type (RING finger)^700-742^E:2.6e-13	GO:0005737^cellular_component^cytoplasm`GO:0043027^molecular_function^cysteine-type endopeptidase inhibitor activity involved in apoptotic process`GO:0016740^molecular_function^transferase activity`GO:0008270^molecular_function^zinc ion binding`GO:0007275^biological_process^multicellular organism development`GO:0043066^biological_process^negative regulation of apoptotic process`GO:0043154^biologi…	.	No	No	No	No
c64348_g2_i1	3.79251	7.20916	1.84779	3.9015	9.56e-05	0.0395636	.	PF03067.14^LPMO_10^Lytic polysaccharide mono-oxygenase, cellulose-degrading^26-215^E:4.7e-30	.	.	Yes	No	No	No
c70271_g4_i1	215.205	4.12421	1.06355	3.87779	0.000105409	0.0419468	.	.	.	.	No	No	No	No
c71188_g1_i1	7.49975	-5.28221	1.36146	-3.87981	0.000104537	0.0419468	.	.	.	.	No	No	No	No
c72205_g5_i1	46.1846	-1.74294	0.450444	-3.86939	0.000109109	0.0420103	.	.	.	.	No	No	No	No
c76080_g3_i1	3.06945	8.27418	2.13901	3.86823	0.000109629	0.0420103	.	.	.	.	No	No	No	No
c72456_g1_i1	59.7519	-4.03592	1.04524	-3.86126	0.000112805	0.0424415	.	.	.	.	No	No	No	No
c66180_g2_i5	169.098	-5.92809	1.53905	-3.85178	0.000117263	0.0433308	.	.	.	.	No	Yes	No	No
c65601_g1_i2	46.4235	-2.84783	0.742454	-3.8357	0.000125209	0.0446729	.	PF17218.2^CBX7_C^CBX family C-terminal motif^76-98^E:1.4e-08	.	.	No	No	No	No
c77325_g3_i1	20.5017	-5.26646	1.37301	-3.83569	0.000125213	0.0446729	.	.	.	.	No	No	No	No
c52153_g1_i2	7.28236	3.84937	1.00891	3.81537	0.000135977	0.0469174	.	.	.	.	No	No	No	No
c67921_g3_i1	14.3527	-2.76153	0.724587	-3.81118	0.000138306	0.0469174	.	.	.	.	No	No	No	No
c77452_g1_i2	29.7371	3.59535	0.943184	3.81193	0.000137886	0.0469174	LRP2_RAT^LRP2_RAT^Q:25-11982,H:447-4414^43.929%ID^E:0^RecName: Full=Low-density lipoprotein receptor-related protein 2;^Eukaryota; Metazoa; Chordata; Craniata; Vertebrata; Euteleostomi; Mammalia; Eutheria; Euarchontoglires; Glires; Rodentia; Sciurognathi; Muroidea; Muridae; Murinae; Rattus`LRP2_RAT^LRP2_RAT^Q:1924-4932,H:25-1012^33.852%ID^E:5.09e-141^RecName: Full=Low-density lipoprotein receptor…	PF14670.5^FXa_inhibition^Coagulation Factor Xa inhibitory site^528-570^E:1.7e-08`PF00057.17^Ldl_recept_a^Low-density lipoprotein receptor domain class A^581-615^E:1.4e-10`PF00057.17^Ldl_recept_a^Low-density lipoprotein receptor domain class A^619-655^E:3.8e-13`PF00057.17^Ldl_recept_a^Low-density lipoprotein receptor domain class A^659-693^E:4.5e-08`PF00057.17^Ldl_recept_a^Low-density lipoprotein …	GO:0016324^cellular_component^apical plasma membrane`GO:0005903^cellular_component^brush border`GO:0031526^cellular_component^brush border membrane`GO:0005905^cellular_component^clathrin-coated pit`GO:0005737^cellular_component^cytoplasm`GO:0005768^cellular_component^endosome`GO:0005615^cellular_component^extracellular space`GO:0016021^cellular_component^integral component of membrane`GO:0016020^…	GO:0005515^molecular_function^protein binding`GO:0005509^molecular_function^calcium ion binding	No	No	No	No
c45433_g1_i1	21.5437	4.39601	1.15589	3.80315	0.00014287	0.0470199	.	.	.	.	No	No	No	No
c53583_g1_i1	29.6373	1.56447	0.411416	3.80266	0.000143152	0.0470199	SNAPN_HUMAN^SNAPN_HUMAN^Q:29-385,H:8-131^53.226%ID^E:8e-35^RecName: Full=SNARE-associated protein Snapin;^Eukaryota; Metazoa; Chordata; Craniata; Vertebrata; Euteleostomi; Mammalia; Eutheria; Euarchontoglires; Primates; Haplorrhini; Catarrhini; Hominidae; Homo	PF14712.5^Snapin_Pallidin^Snapin/Pallidin^24-111^E:2.1e-28`PF01442.17^Apolipoprotein^Apolipoprotein A1/A4/E domain^30-125^E:0.017	GO:1904115^cellular_component^axon cytoplasm`GO:0031083^cellular_component^BLOC-1 complex`GO:0099078^cellular_component^BORC complex`GO:0030054^cellular_component^cell junction`GO:0000139^cellular_component^Golgi membrane`GO:0005765^cellular_component^lysosomal membrane`GO:0048471^cellular_component^perinuclear region of cytoplasm`GO:0030141^cellular_component^secretory granule`GO:0045202^cellula…	GO:0008289^molecular_function^lipid binding`GO:0006869^biological_process^lipid transport`GO:0042157^biological_process^lipoprotein metabolic process`GO:0005576^cellular_component^extracellular region	No	No	No	No
c65449_g1_i1	8.23966	5.5583	1.46827	3.78562	0.000153327	0.0495748	.	.	.	.	No	No	No	No
